# Supplementary material
Source: PubMed Central journal article supplement (PMC5500414)

## Supplementary Figure S1

(a) 3p24

(i) All Cases vs. Controls (EUR)

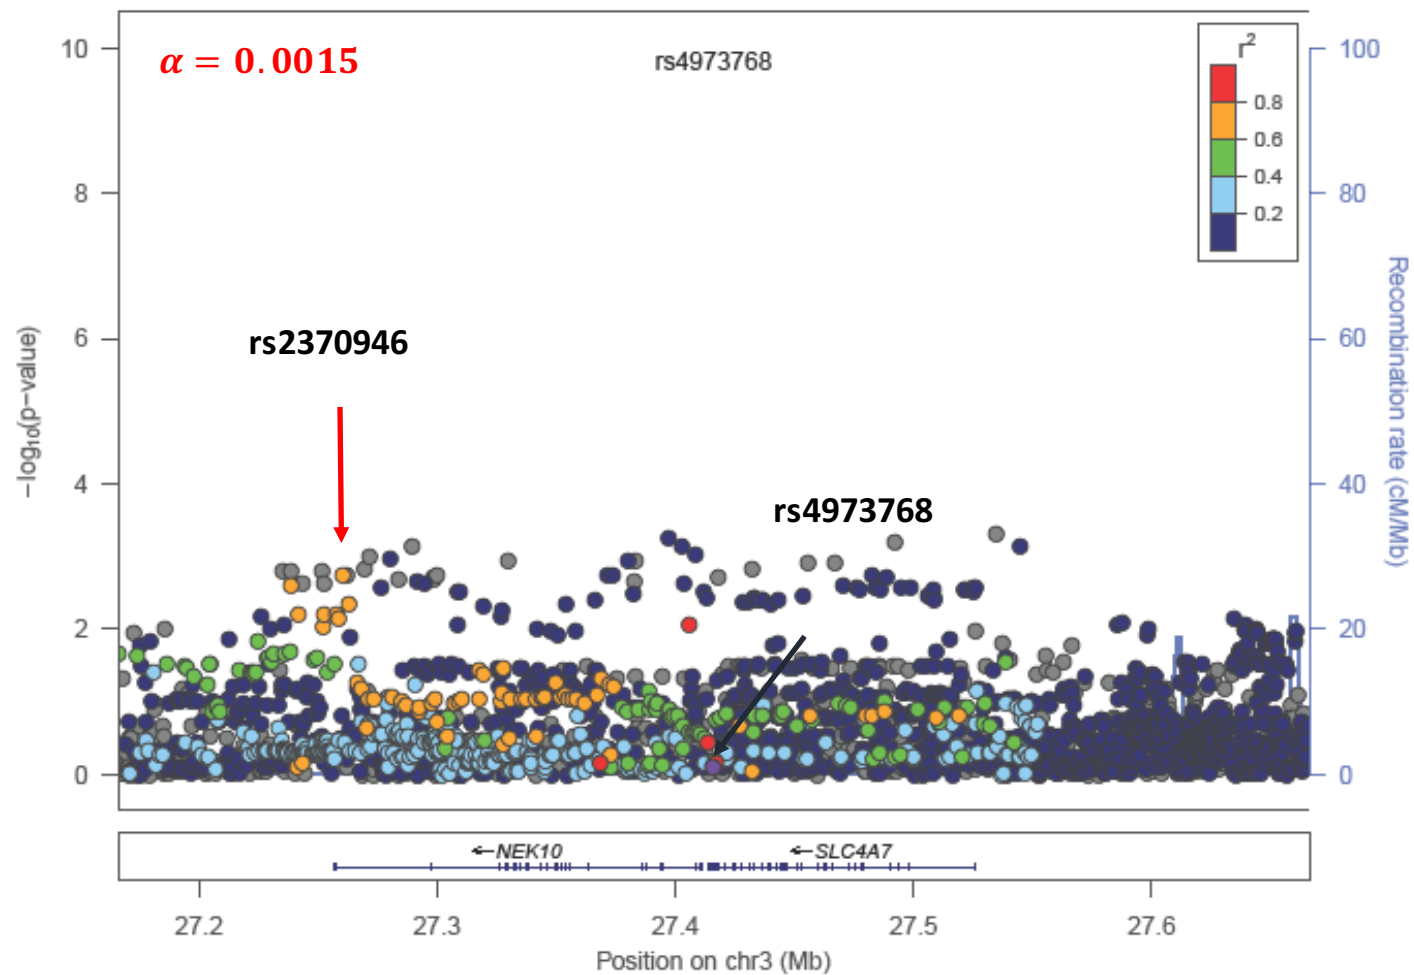

(a) 3p24

(ii) All Cases vs. Controls (AFR)

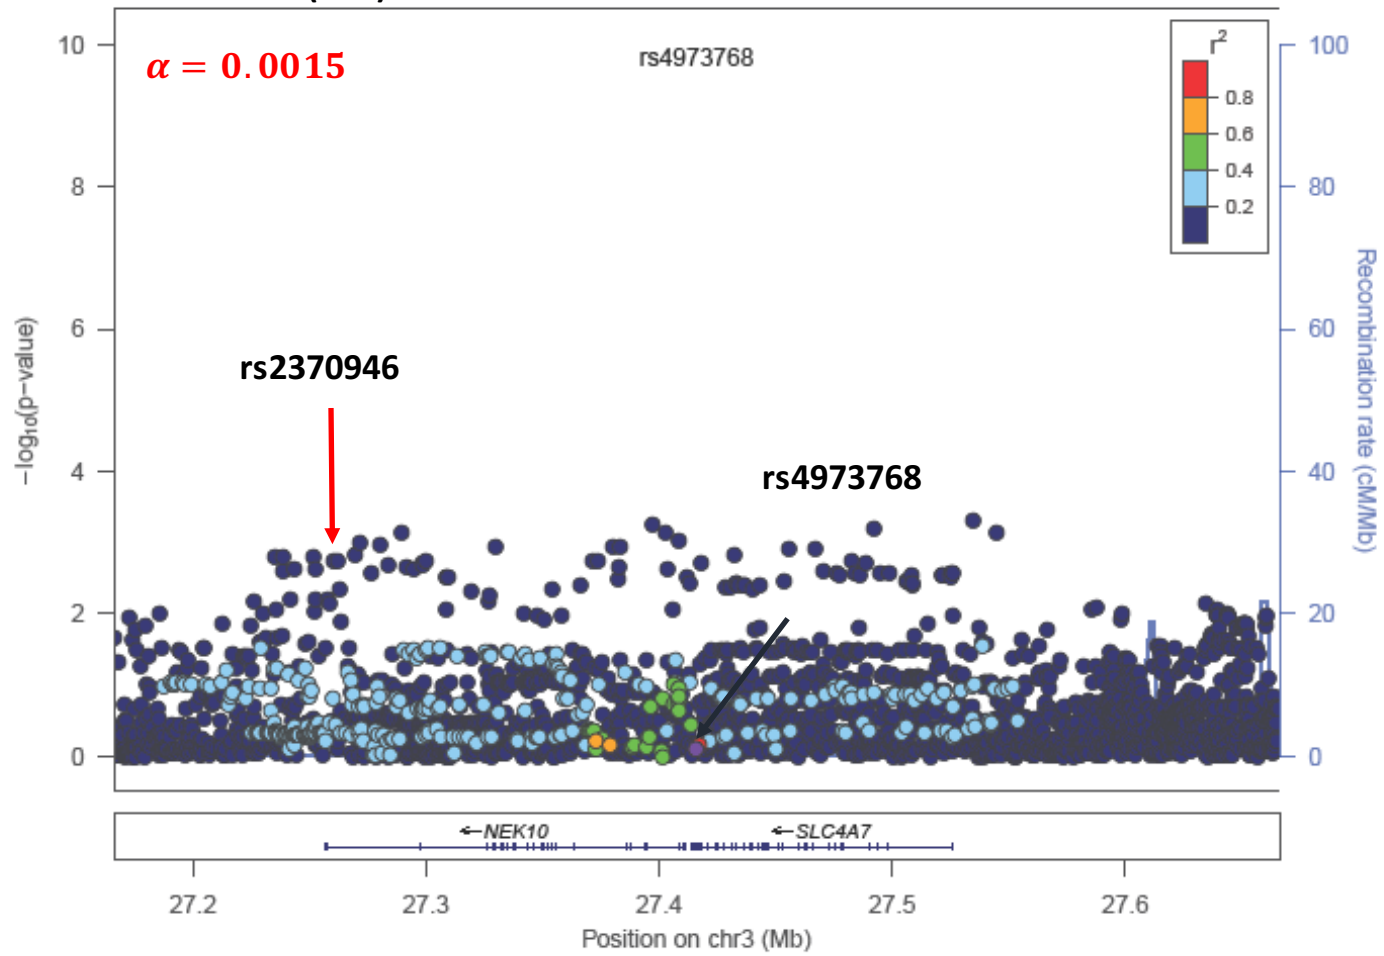

(a) 3p24

(iii) ER+ Cases vs. Controls (EUR)

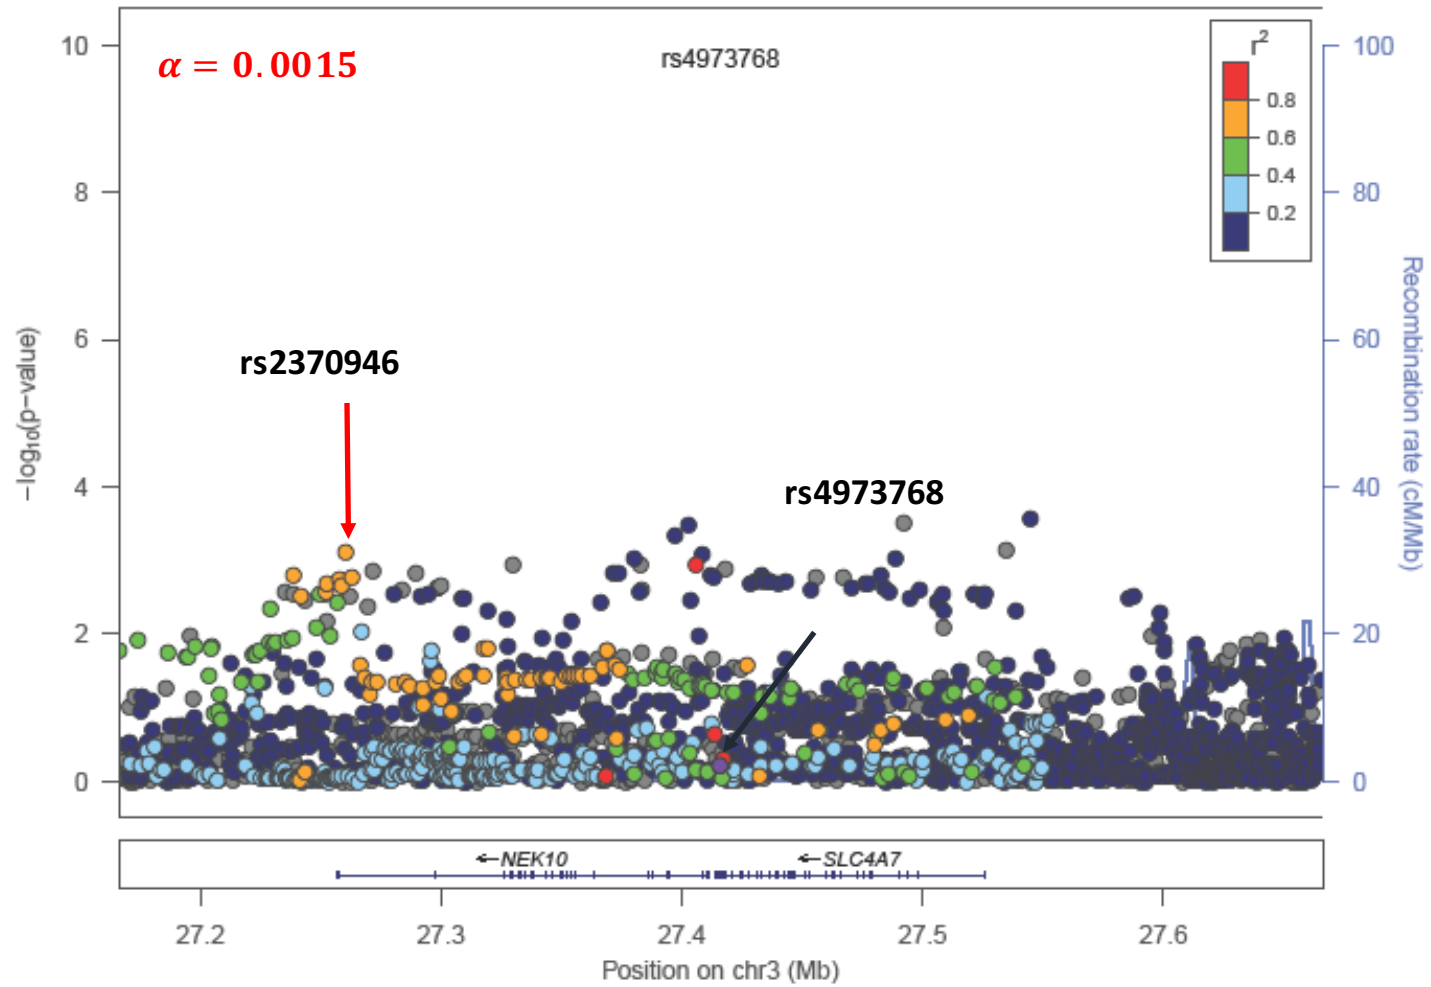

(a) 3p24

(iv) ER+ Cases vs. Controls (AFR)

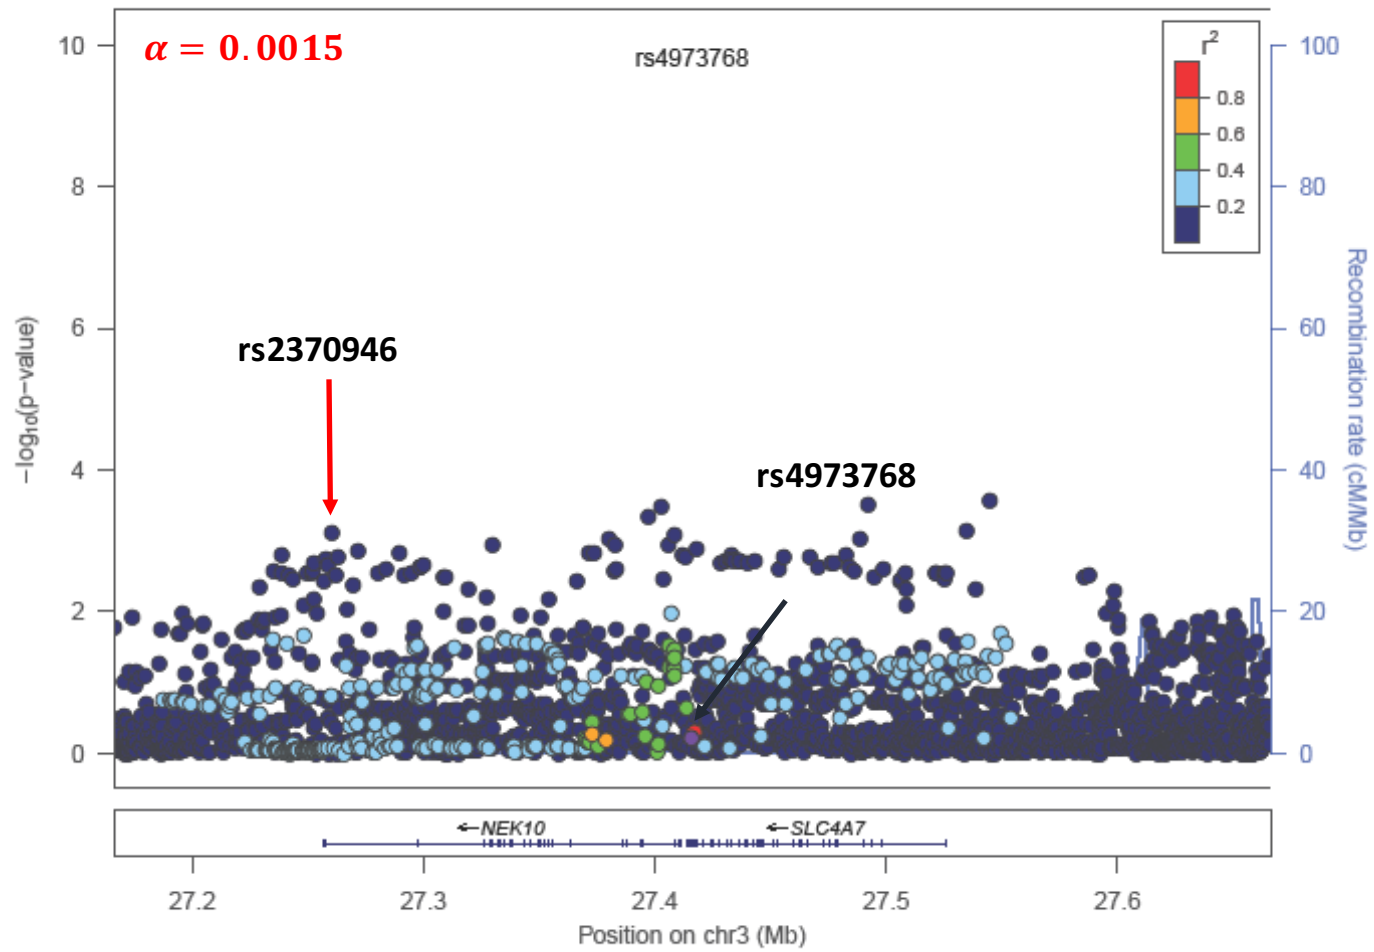

(a) 3p24

(v) ER- Cases vs. Controls (EUR)

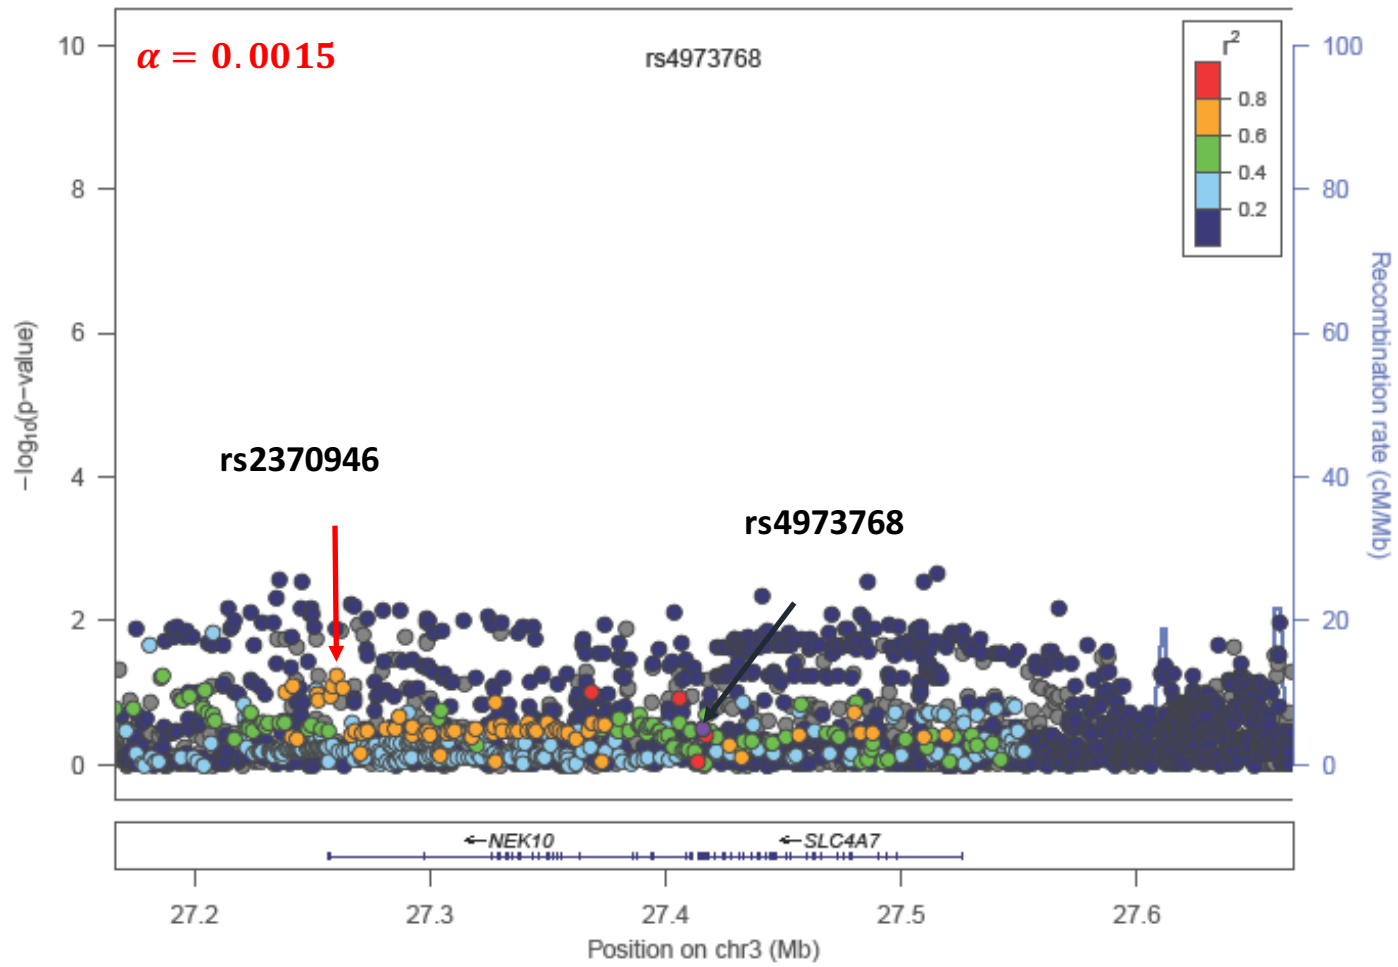

(a) 3p24

(vi) ER- Cases vs. Controls (AFR)

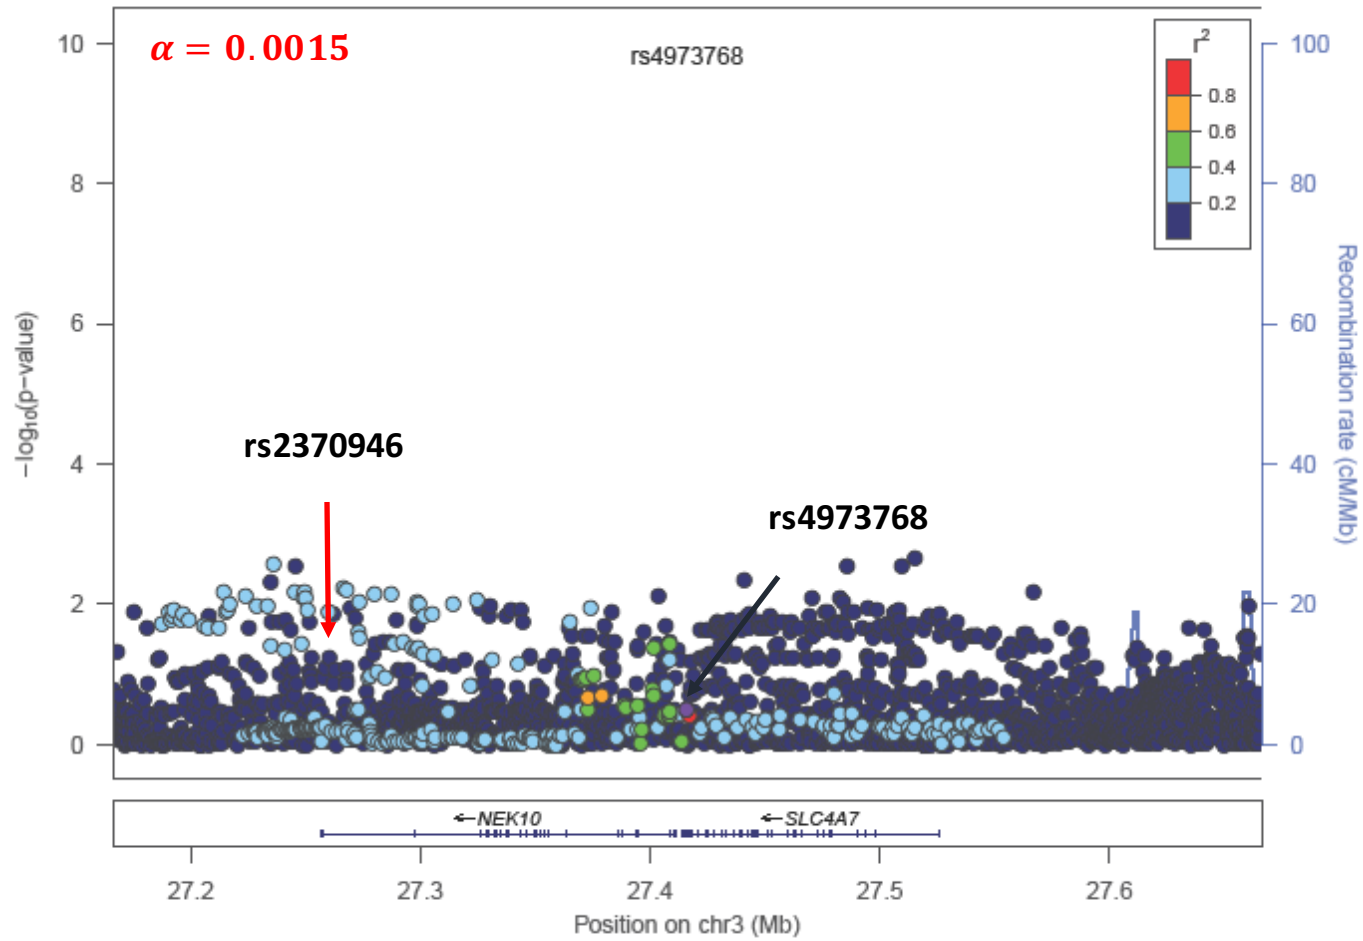

**(b) 11q13**

**(i) All Cases vs. Controls (EUR)**

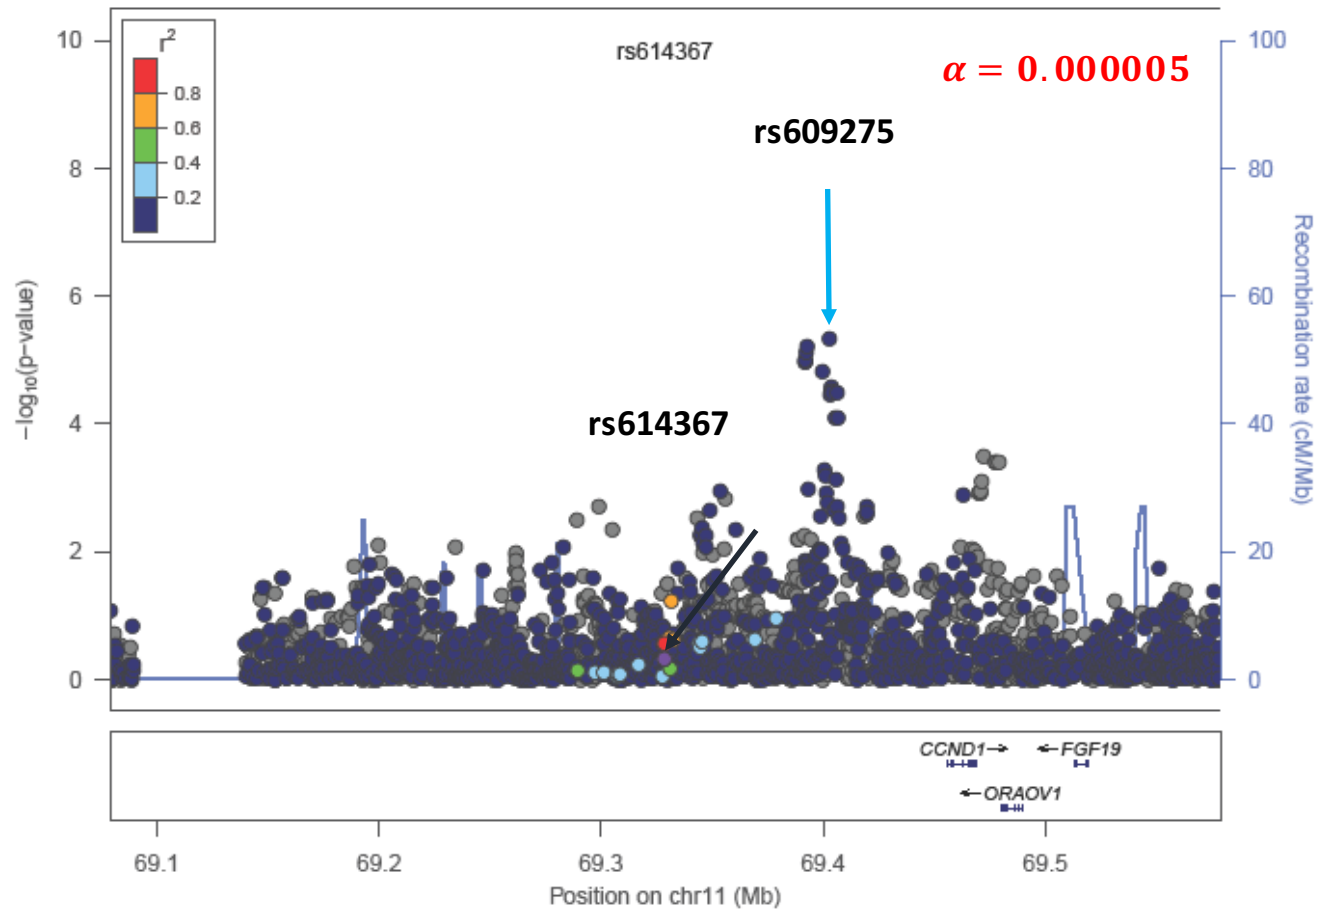

(b) 11q13

(ii) All Cases vs. Controls (AFR)

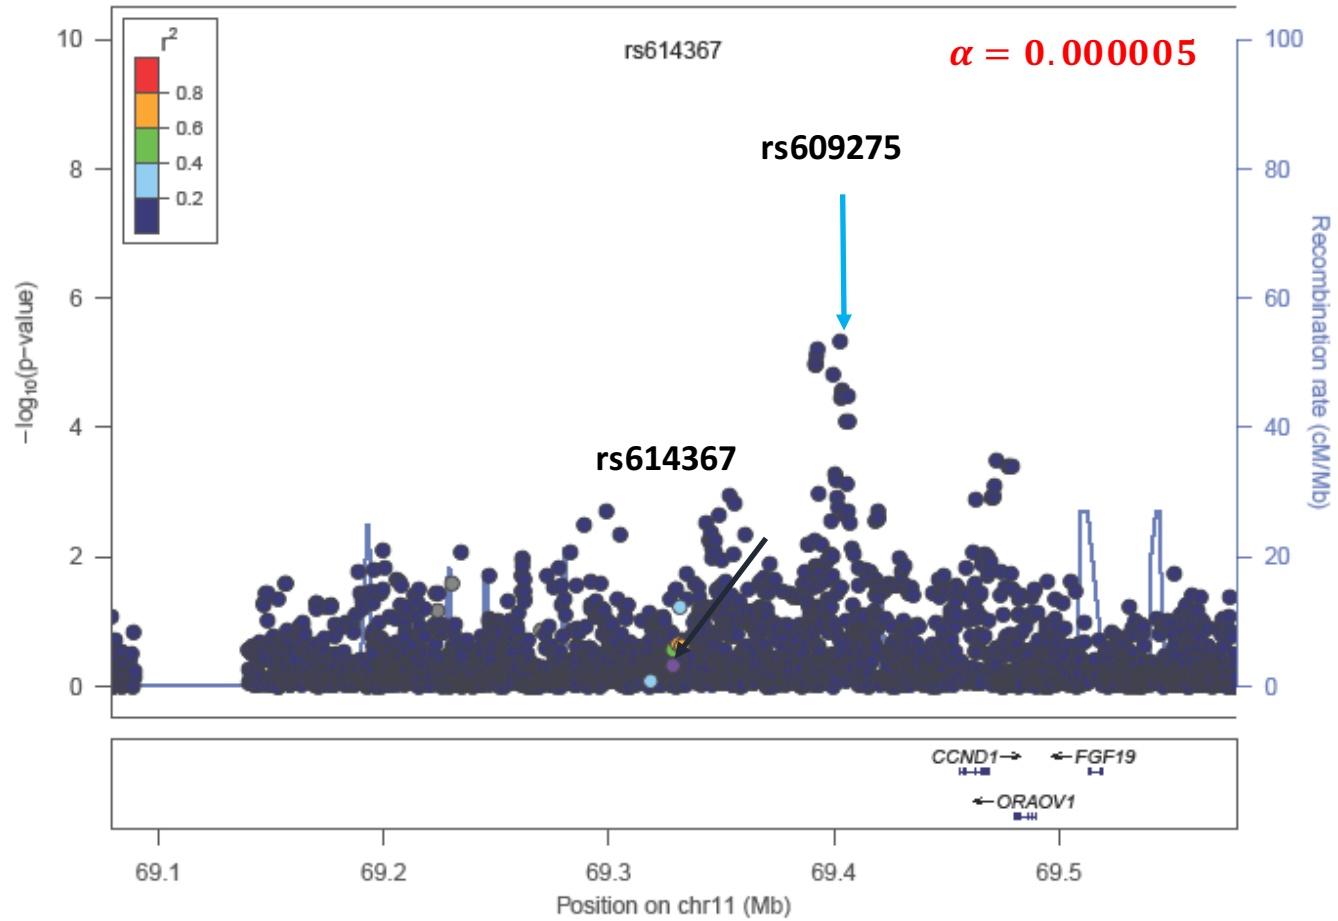



(b) 11q13

(iii) ER+ Cases vs. Controls (EUR)

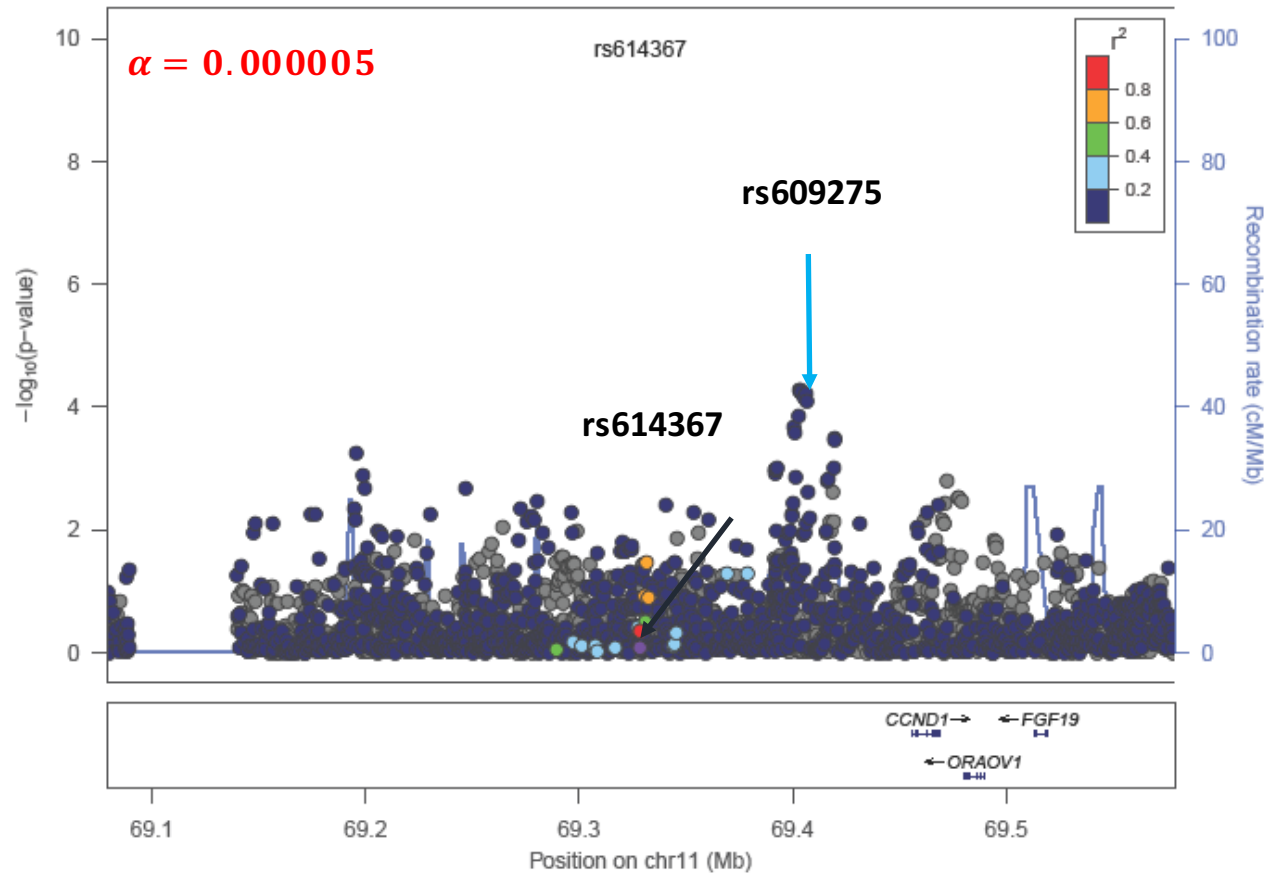

(b) 11q13

(iv) ER+ Cases vs. Controls (AFR)

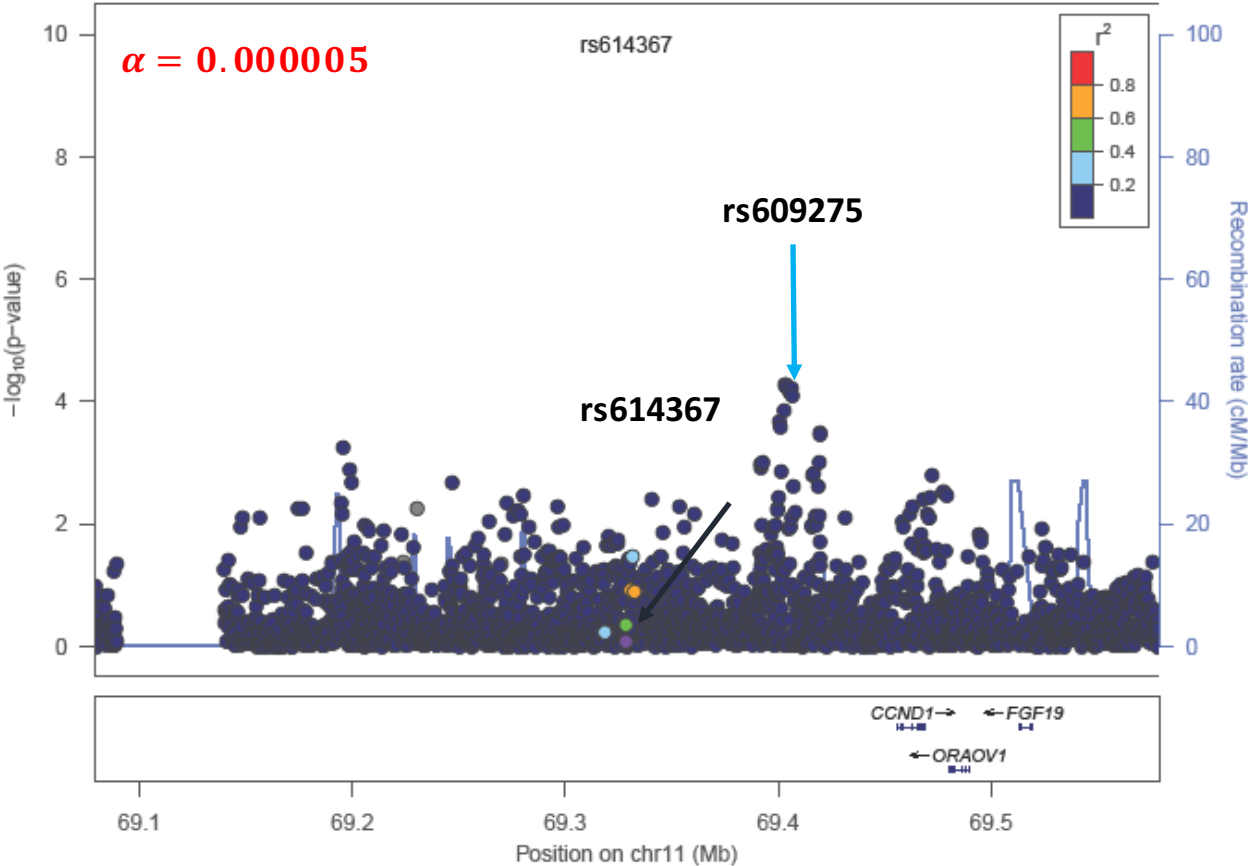

(b) 11q13

(v) ER- Cases vs. Controls (EUR)

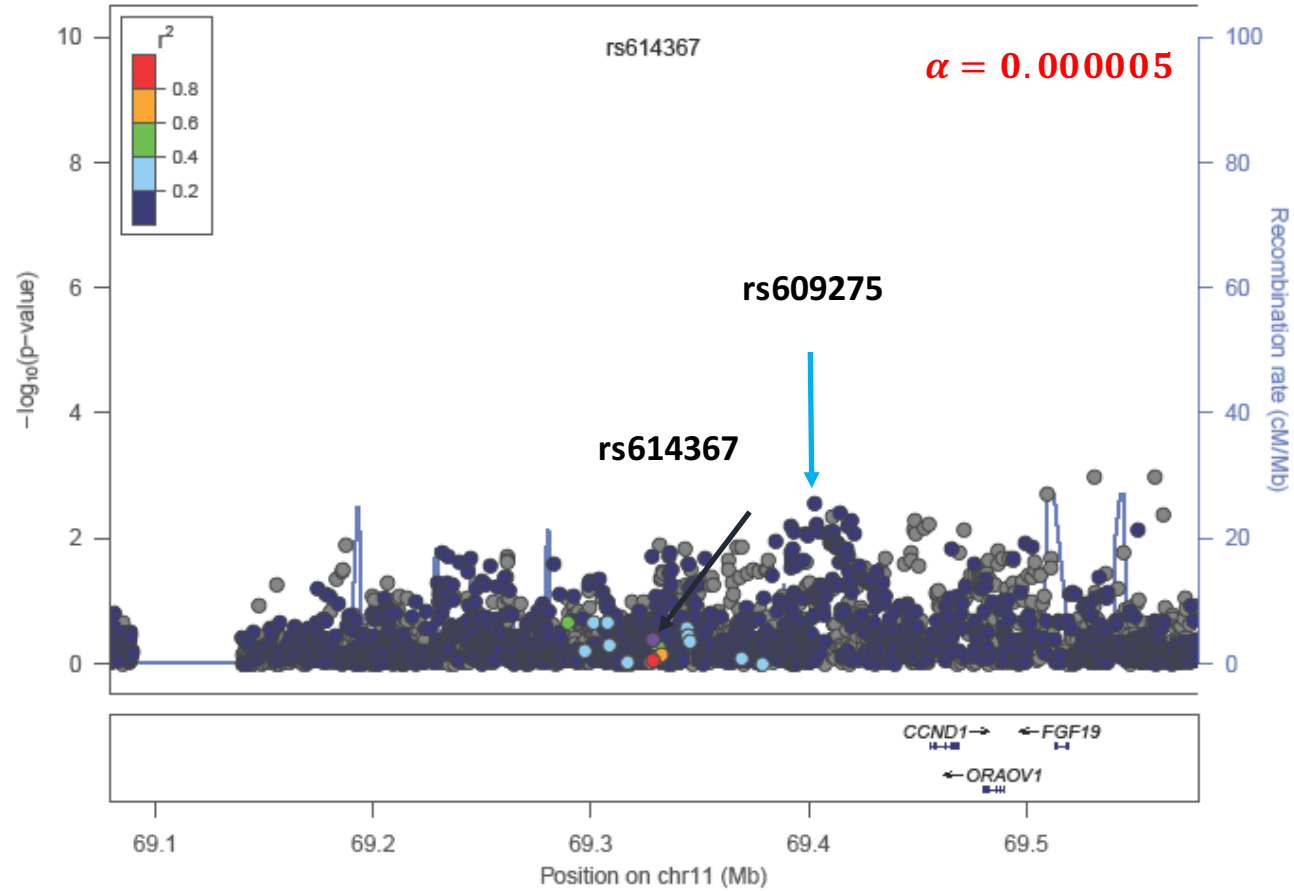

**(b) 11q13**

**(vi) ER- Cases vs. Controls (AFR)**

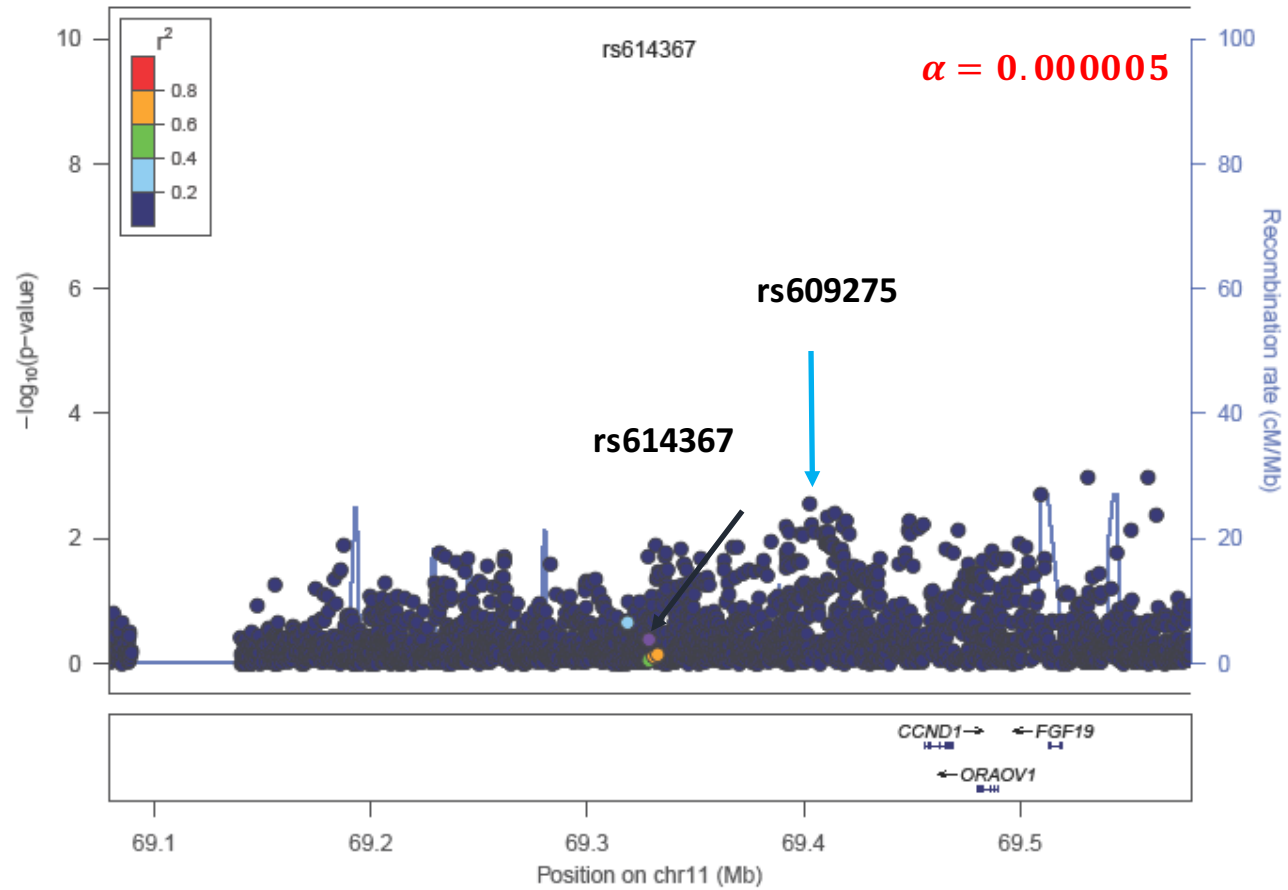

(c) 12p11

(i) All Cases vs. Controls (EUR)

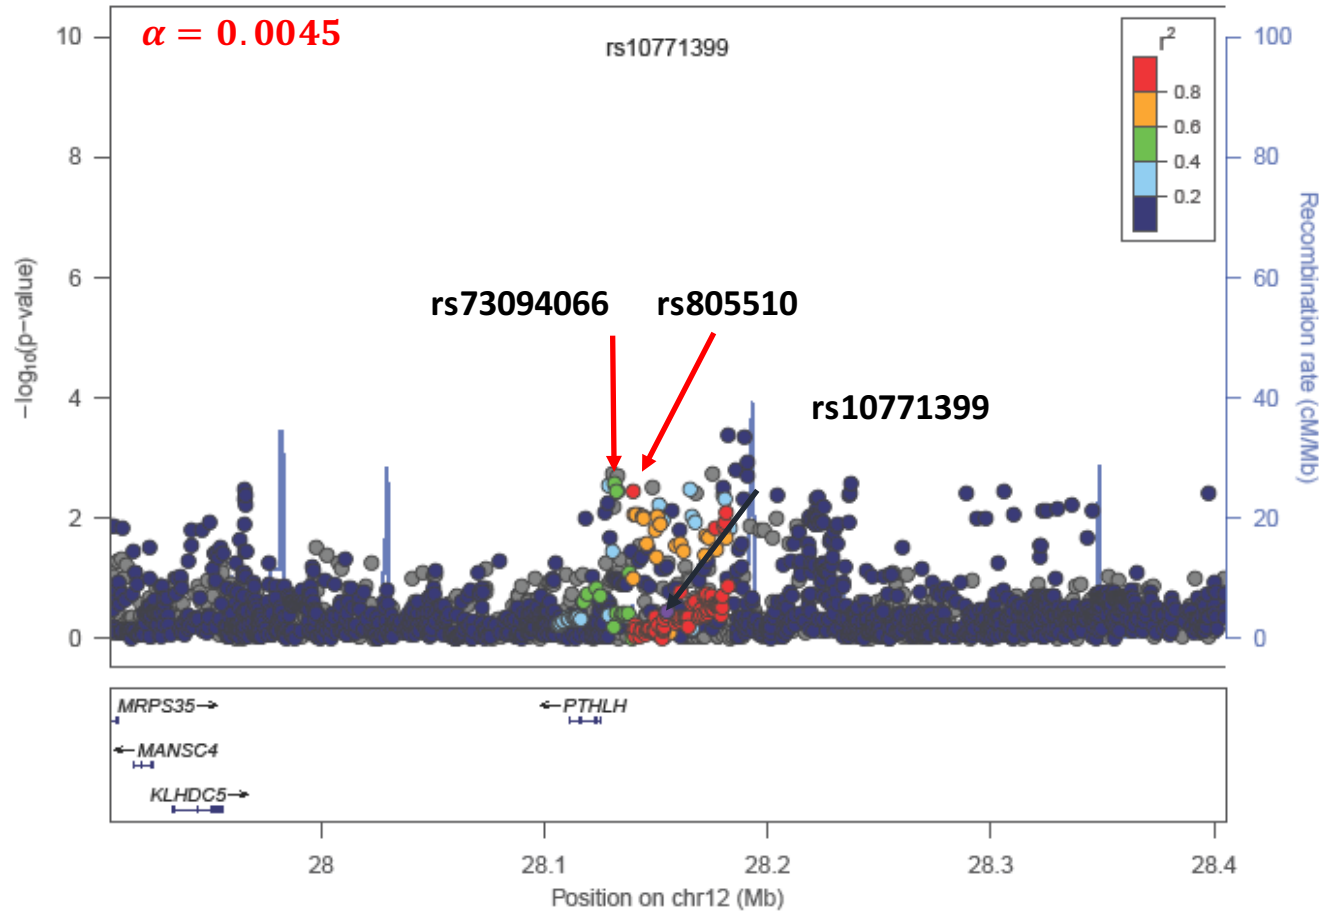

(c) 12p11

(ii) All Cases vs. Controls (AFR)

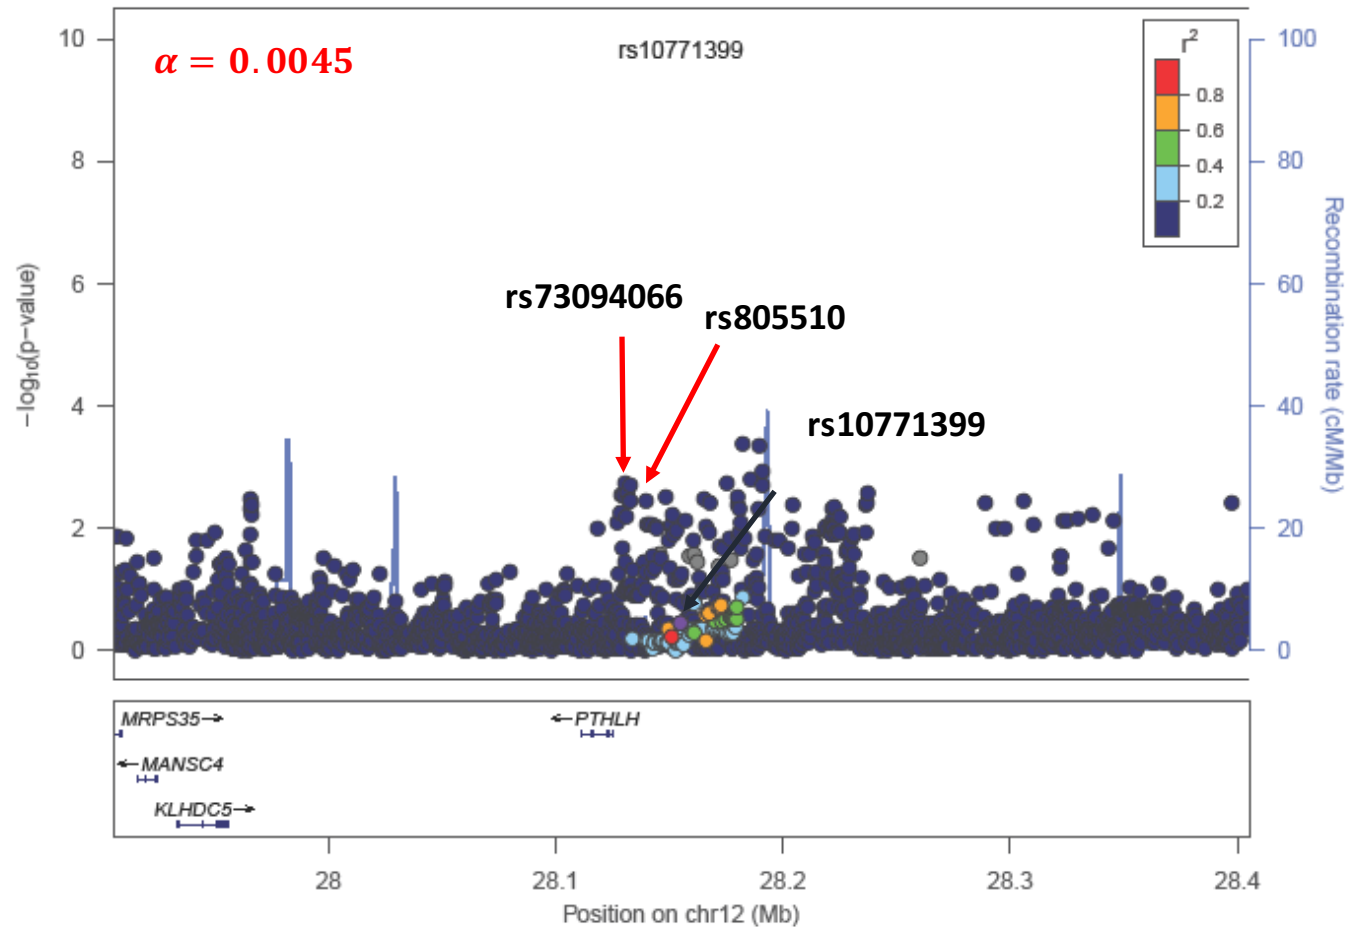

(c) 12p11

(iii) ER+ Cases vs. Controls (EUR)

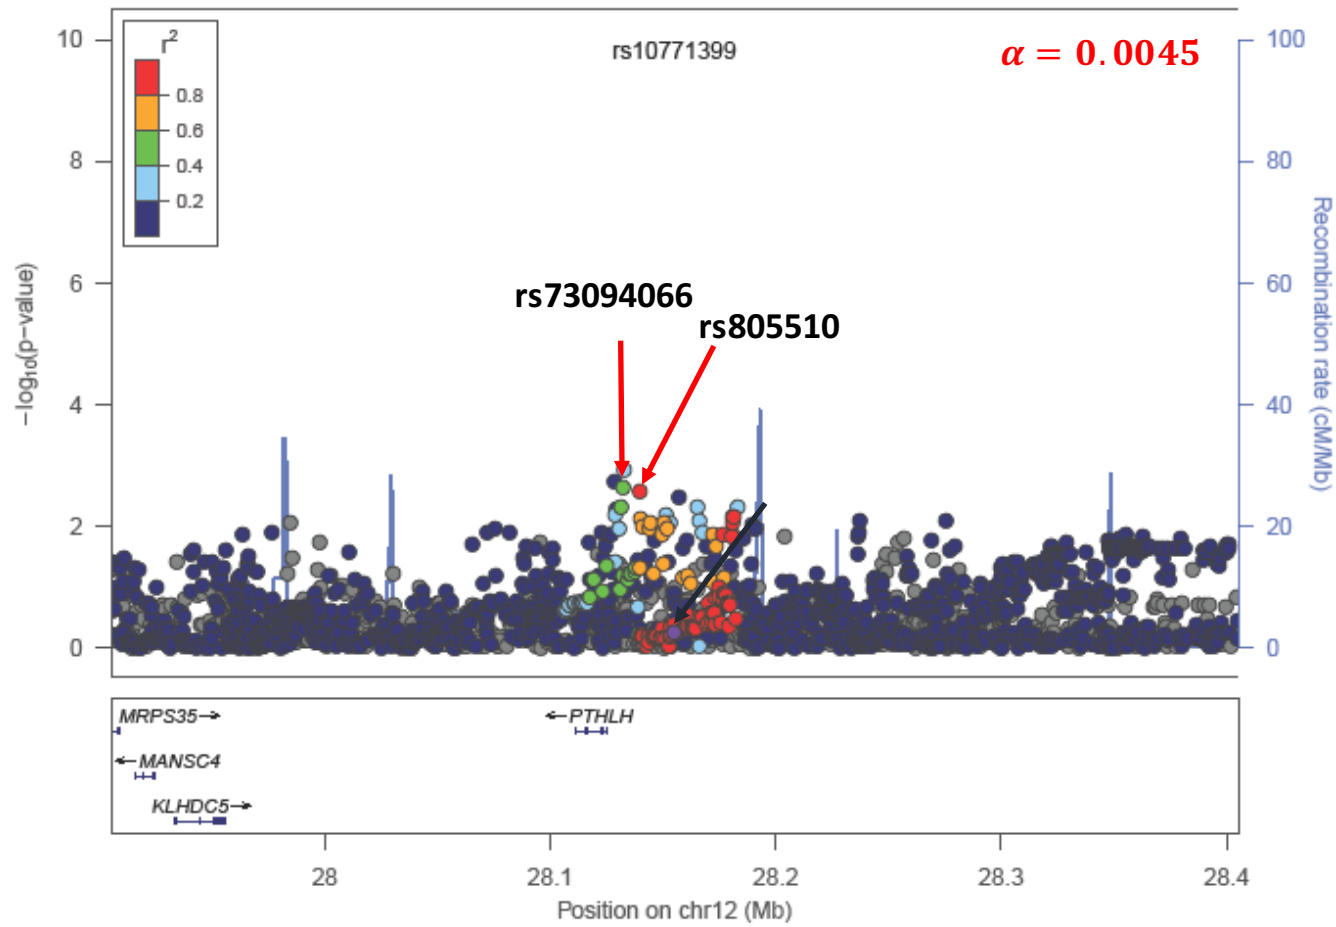

(c) 12p11

(iv) ER+ Cases vs. Controls (AFR)

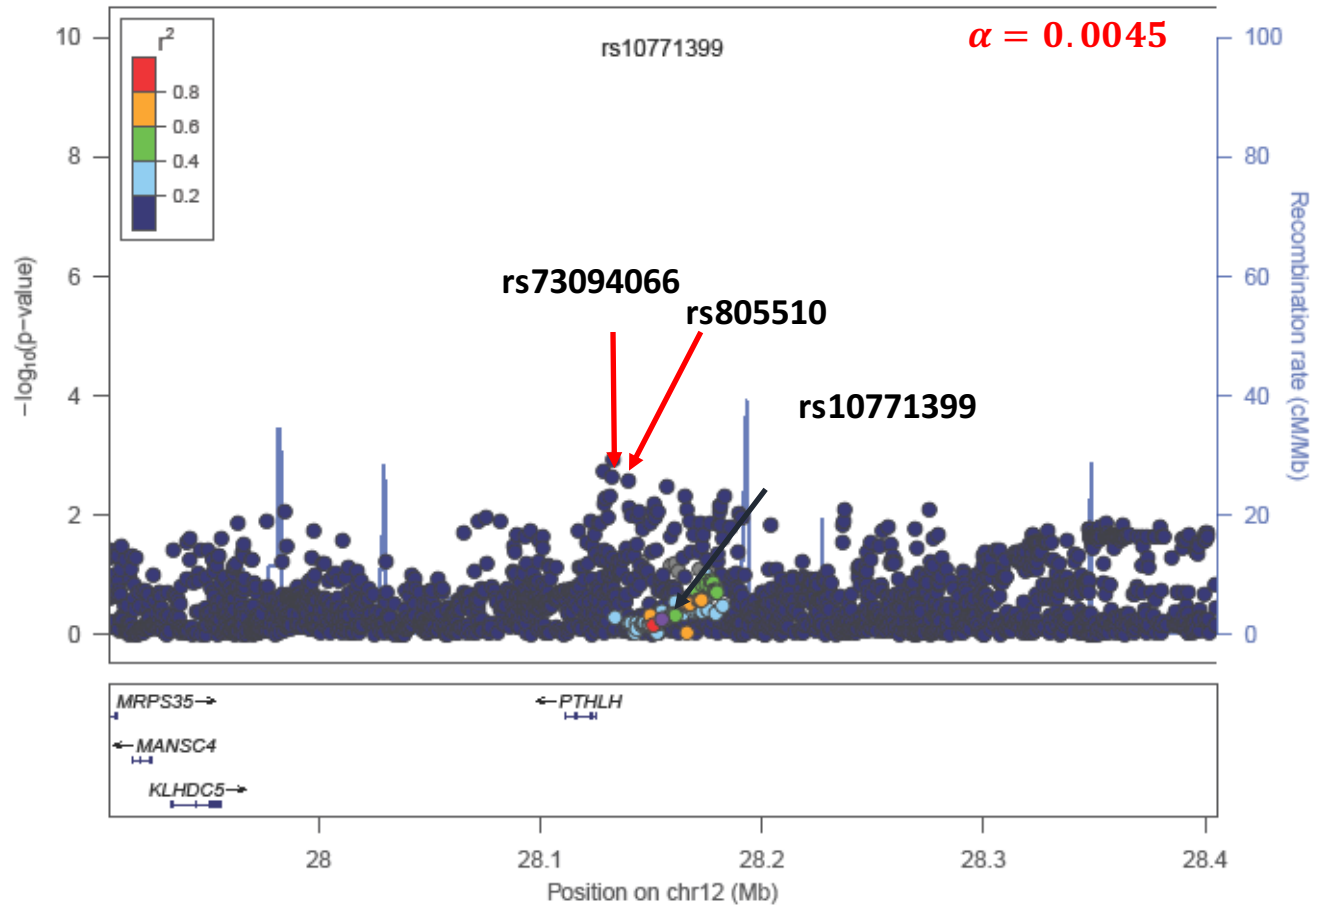



(c) 12p11

(v) ER- Cases vs. Controls (EUR)

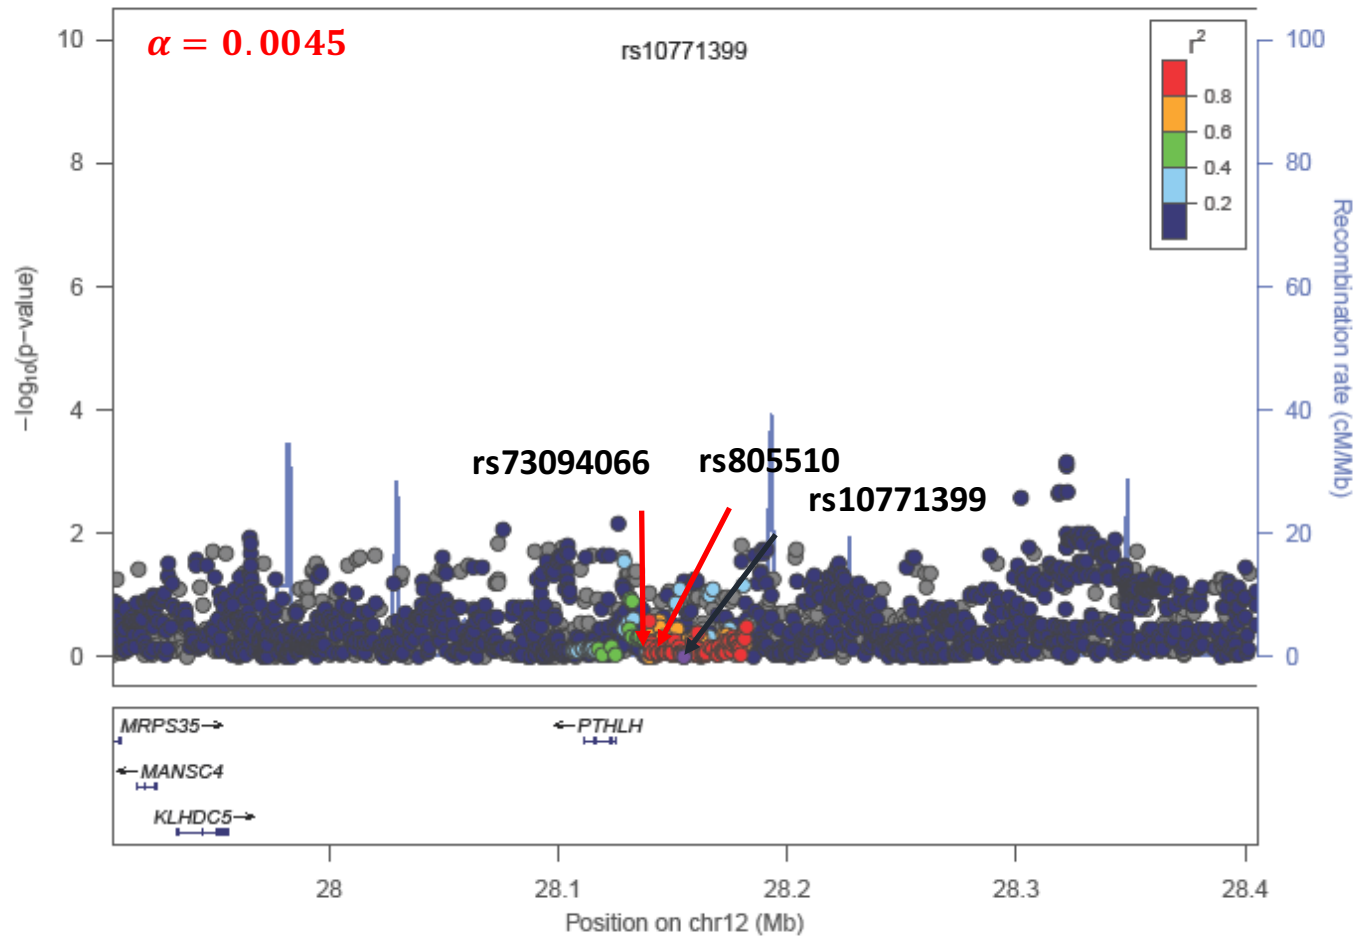

(c) 12p11

(vi) ER- Cases vs. Controls (AFR)

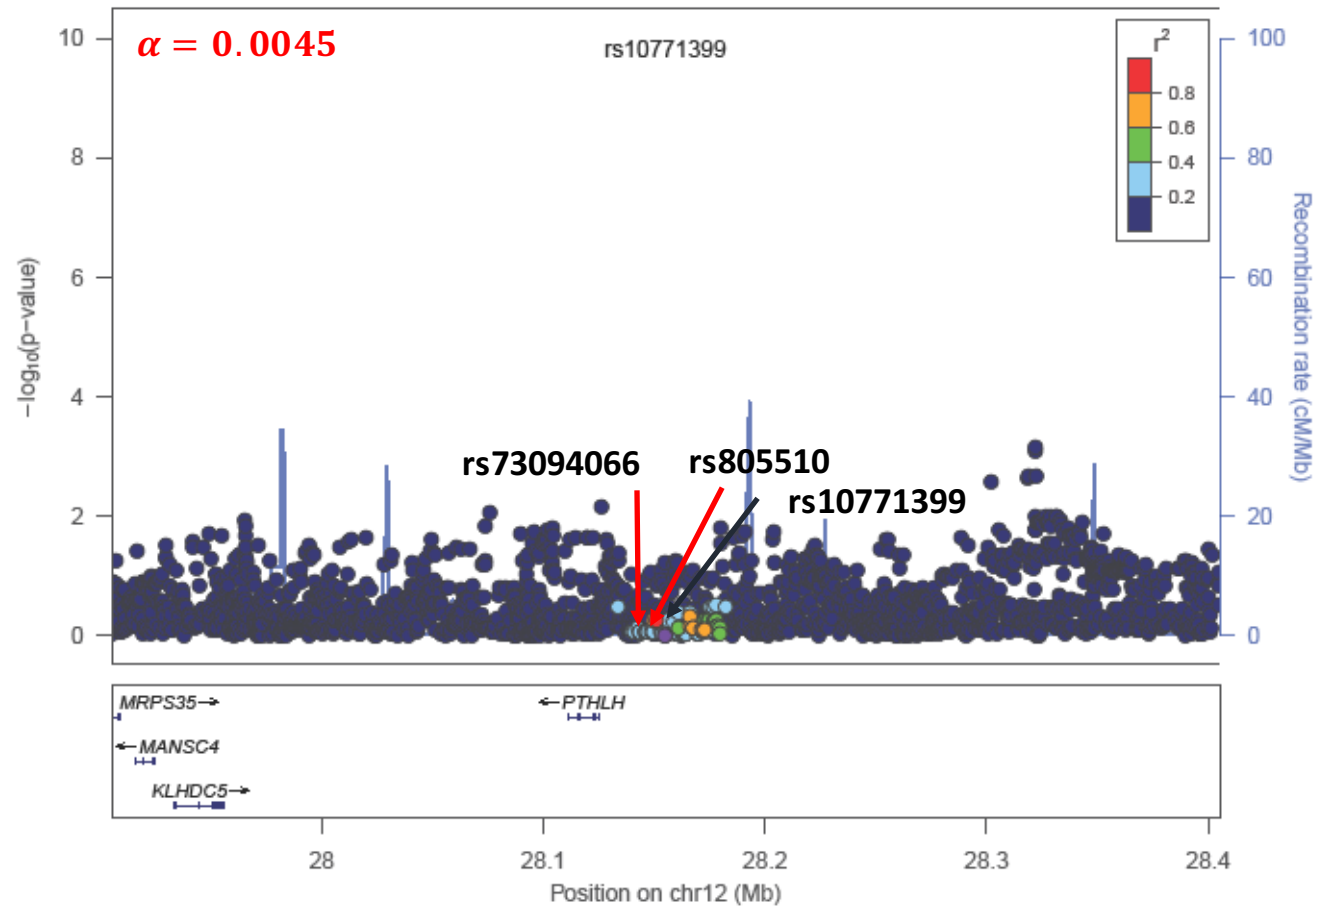

(d) 14q13

(i) All Cases vs. Controls (EUR)

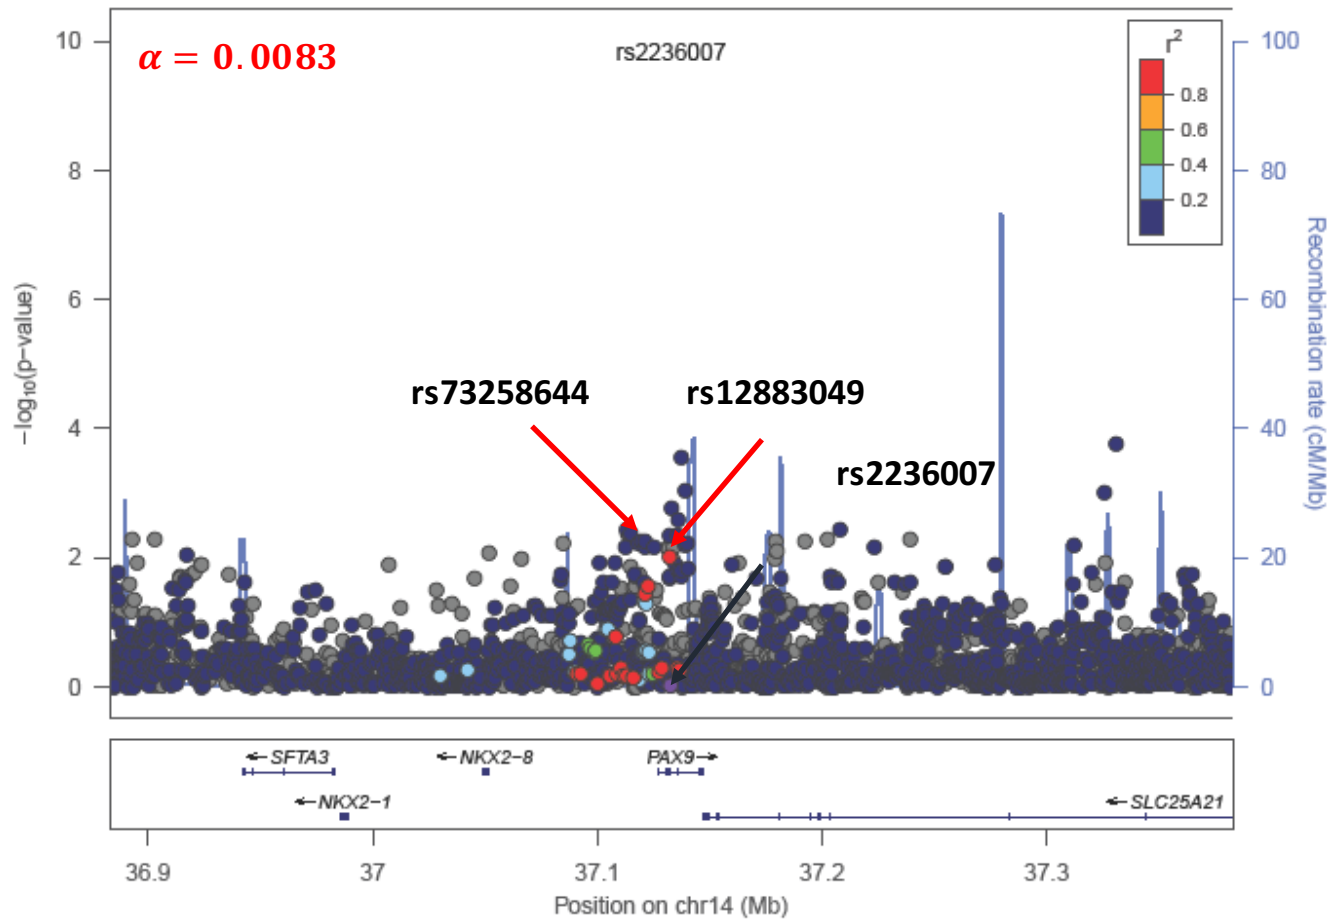

(d) 14q13  
(ii) All Cases vs. Controls (AFR)

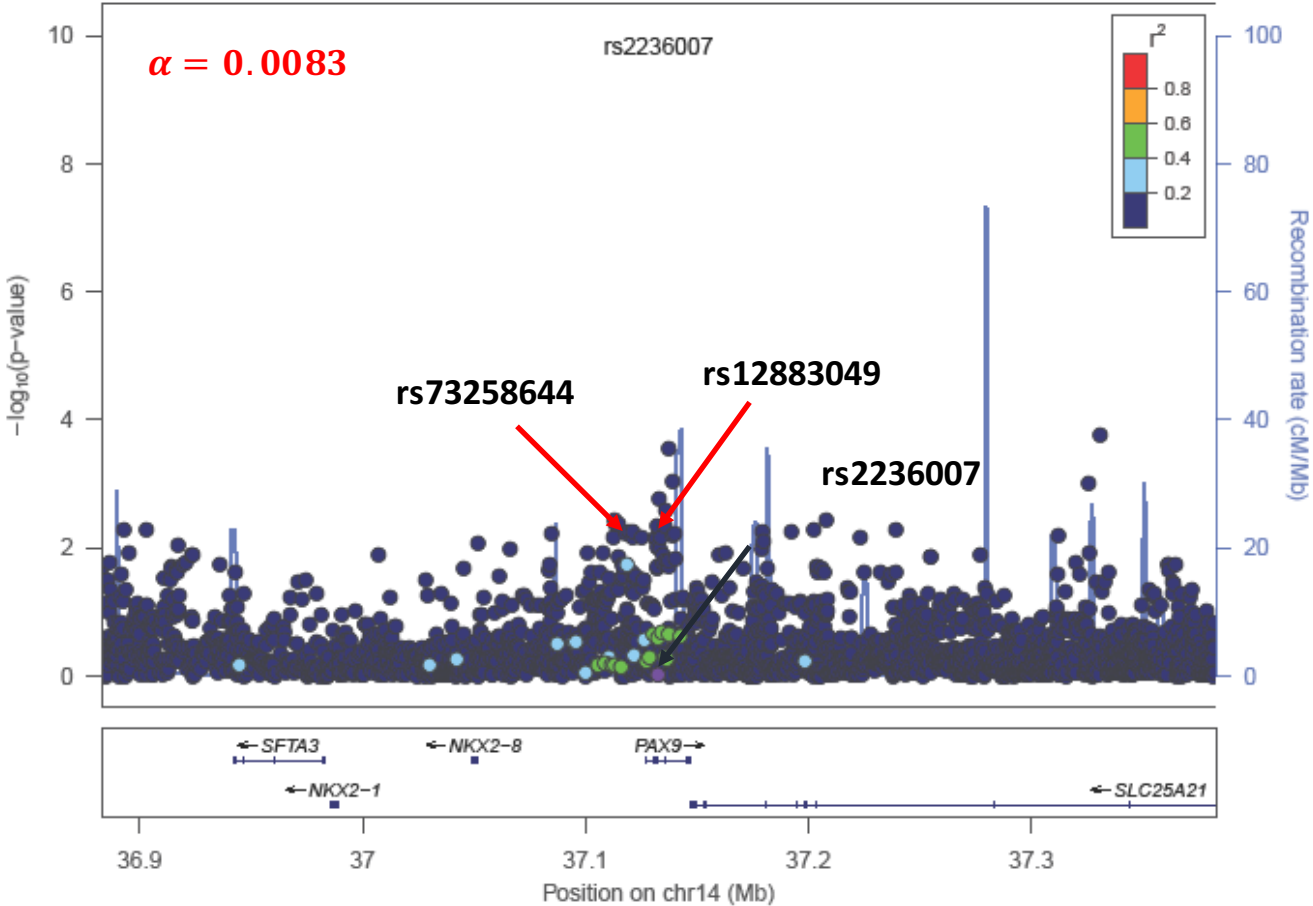

(d) 14q13  
(iii) ER+ Cases vs. Controls (EUR)

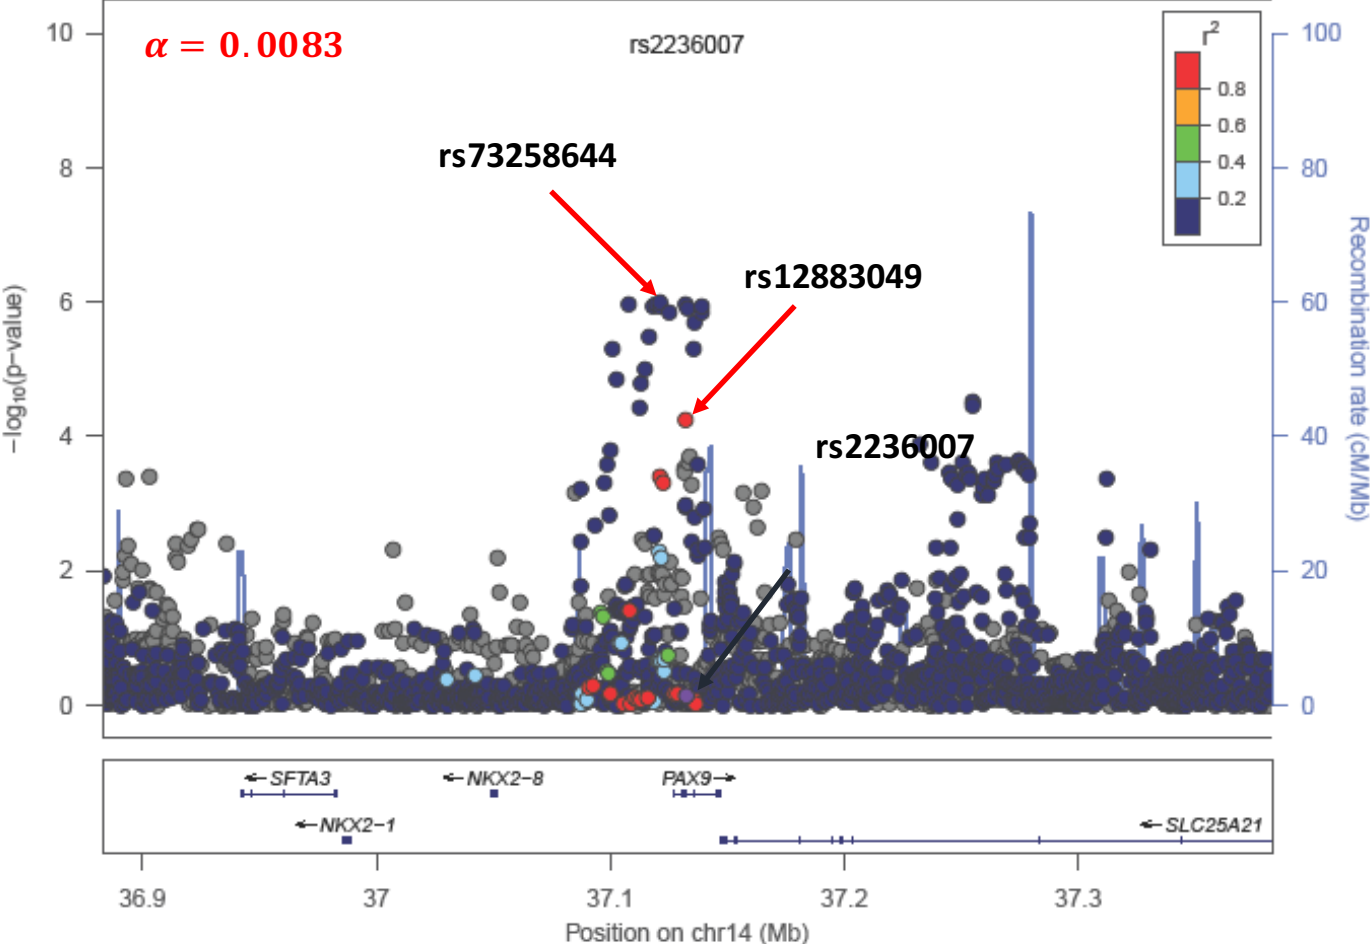

(d) 14q13  
(iv) ER+ Cases vs. Controls (AFR)

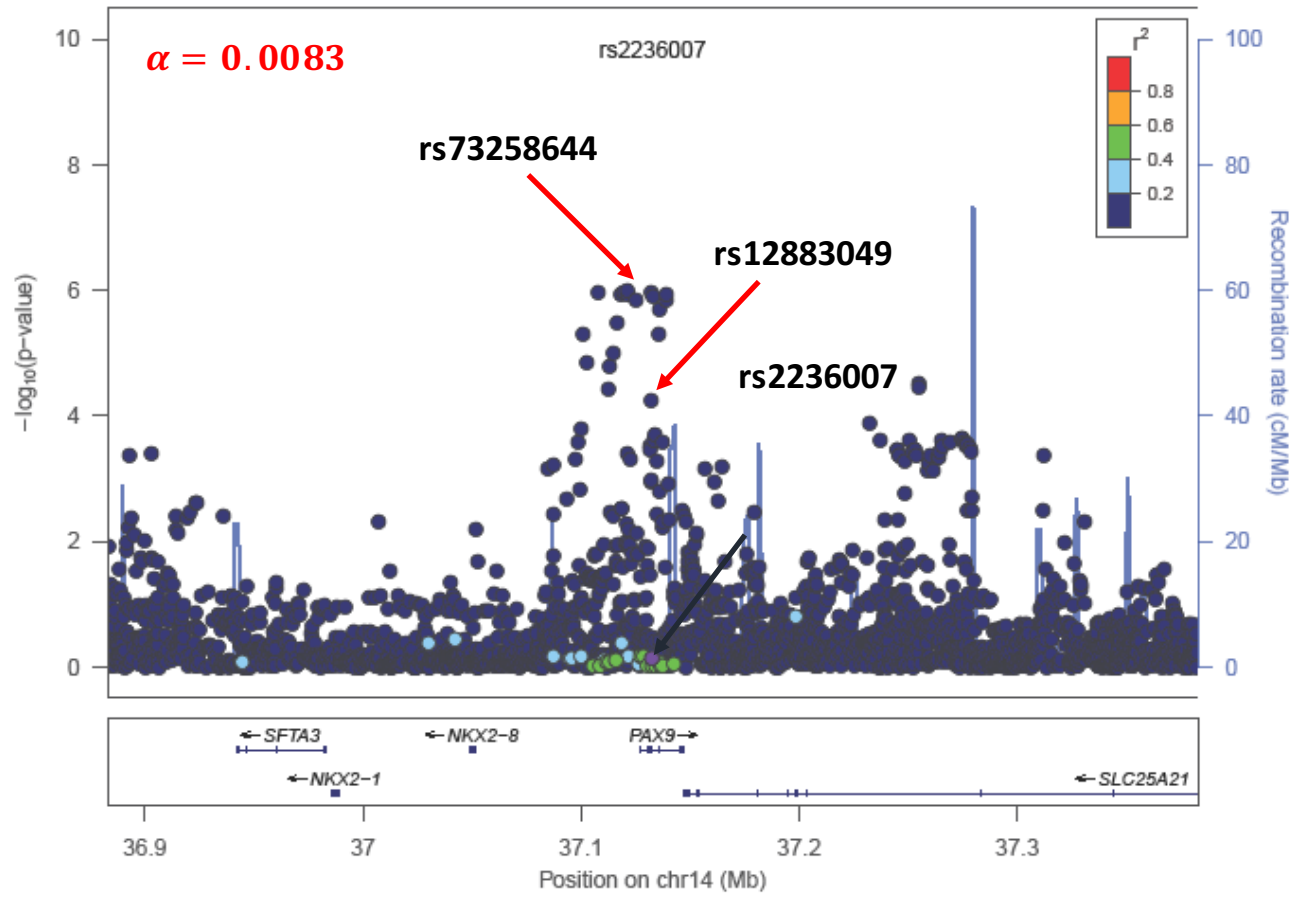

(d) 14q13

(v) ER- Cases vs. Controls (EUR)

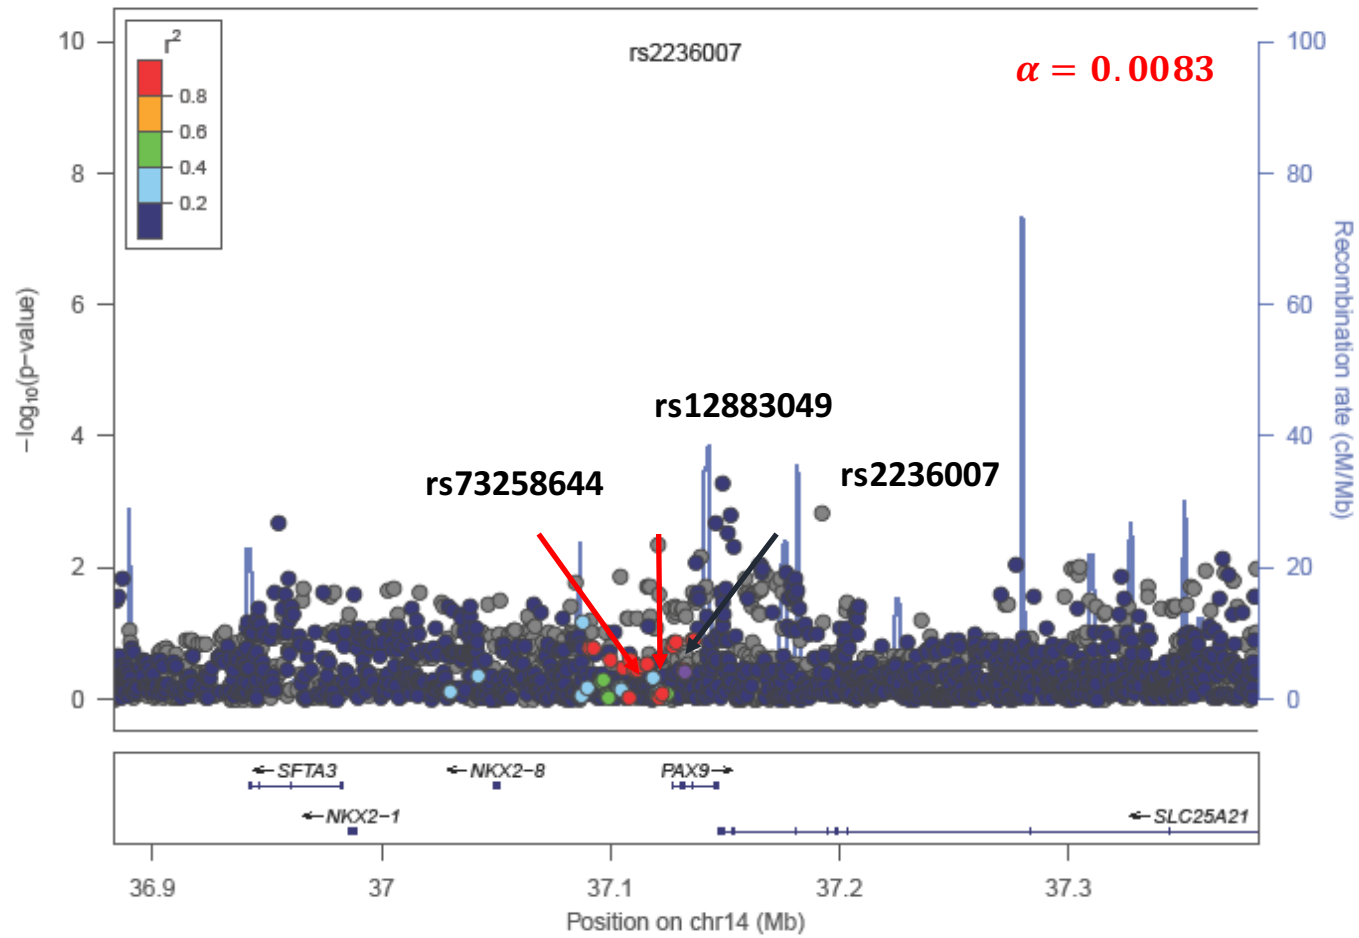

(d) 14q13

(vi) ER- Cases vs. Controls (AFR)

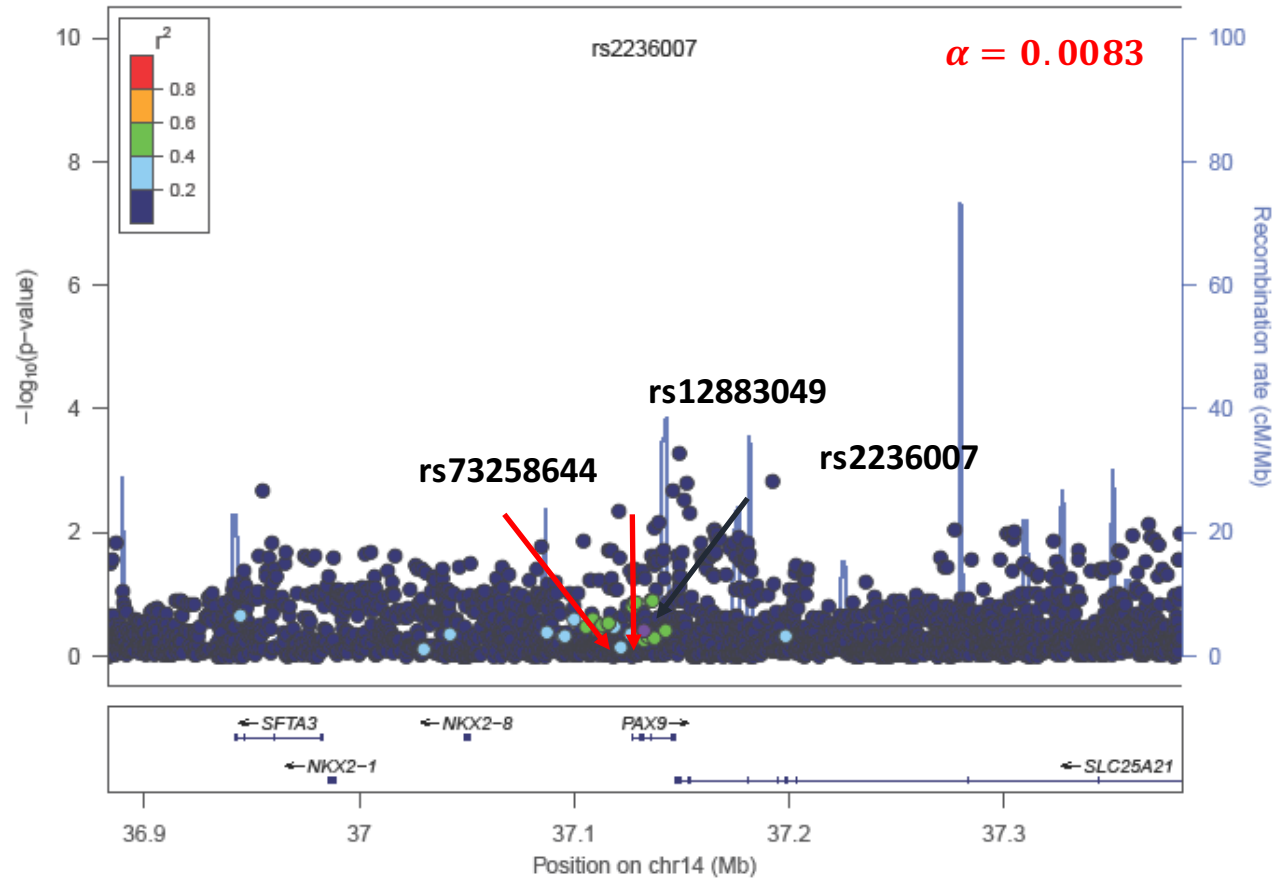



(e) 16q12/TOX3

(i) All Cases vs. Controls (EUR)

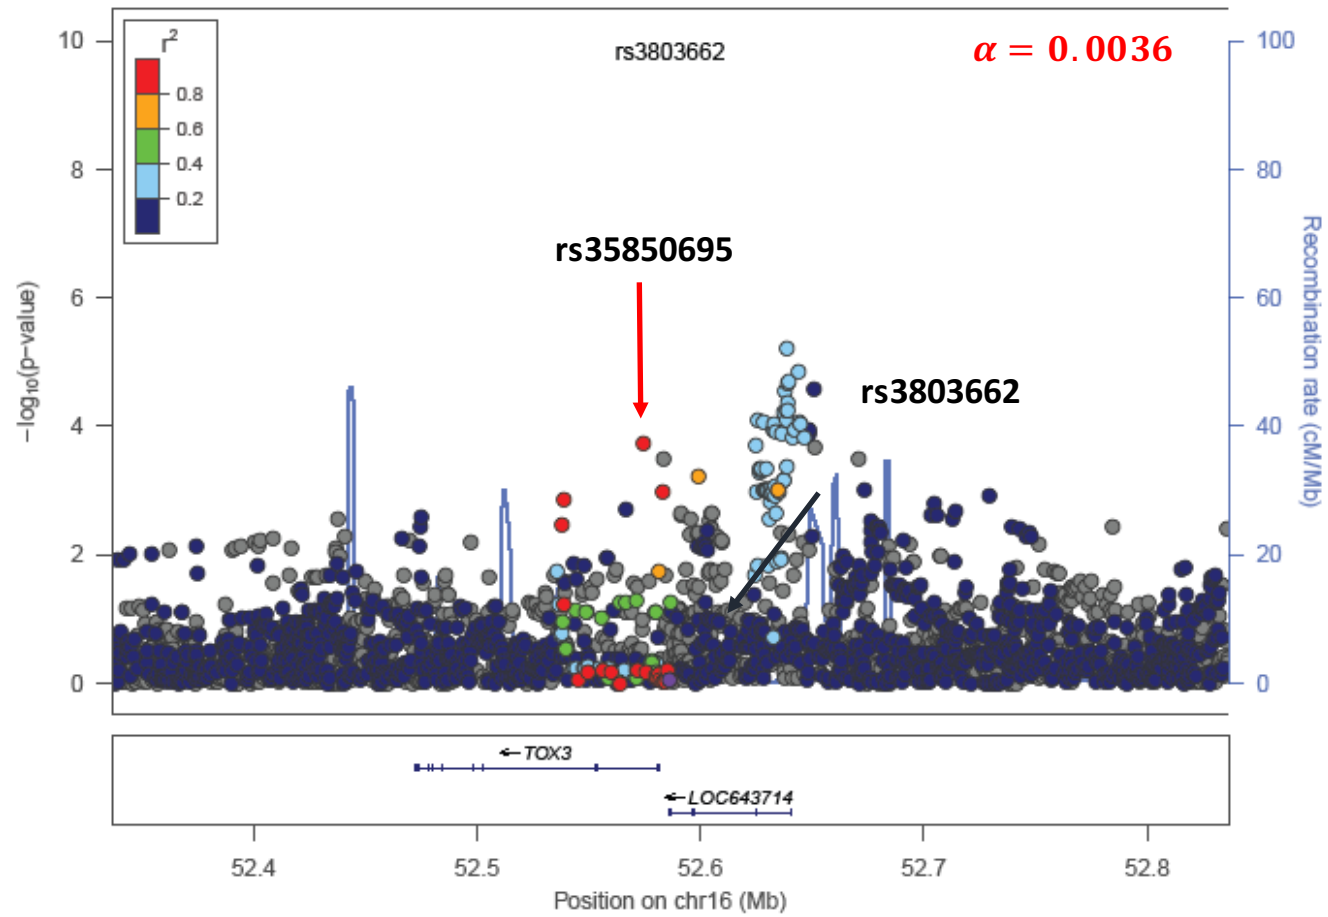

(e) 16q12/TOX3  
(ii) All Cases vs. Controls (AFR)

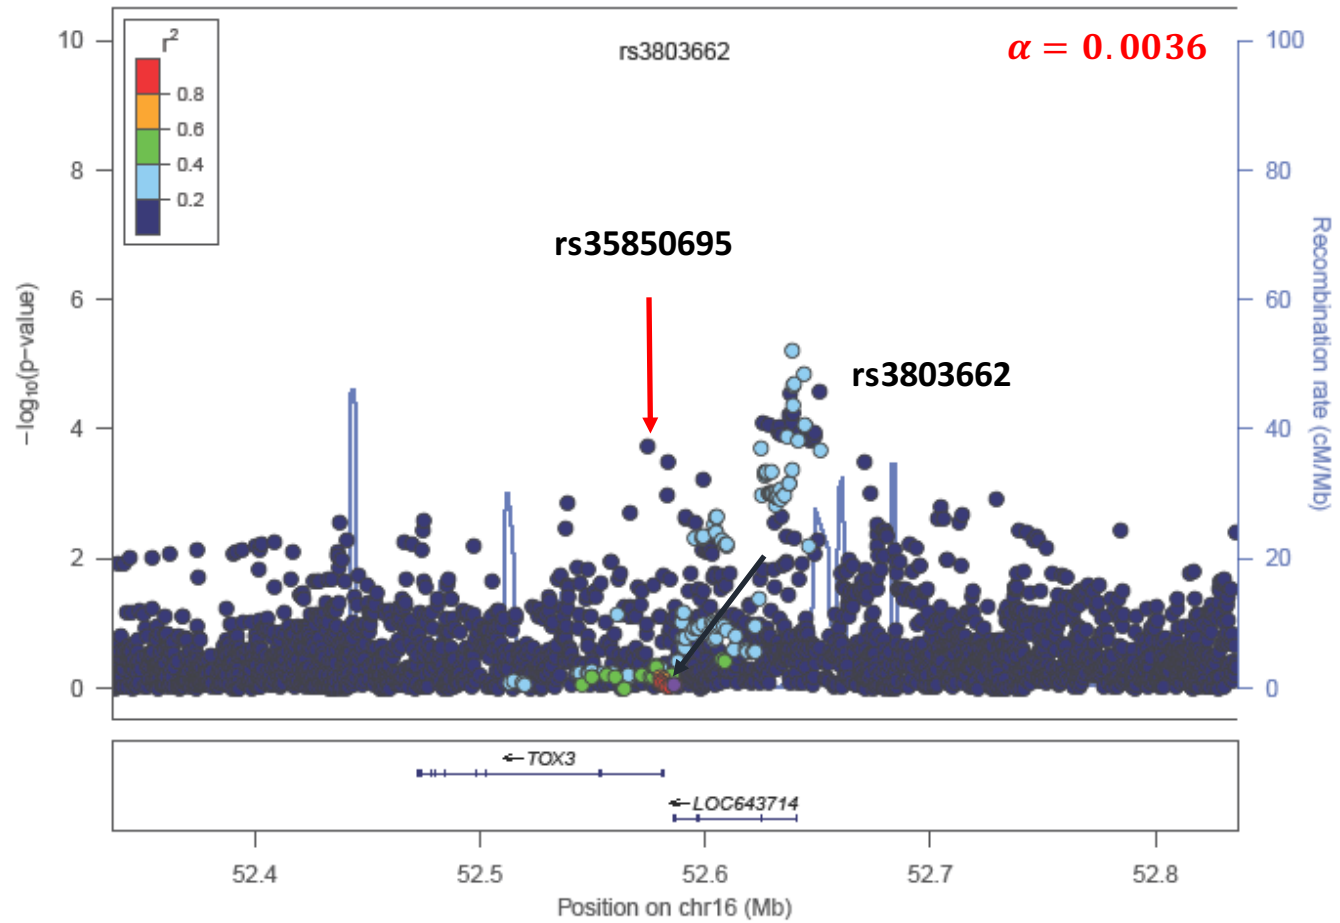

(e) 16q12/TOX3  
(iii) ER+ Cases vs. Controls (EUR)

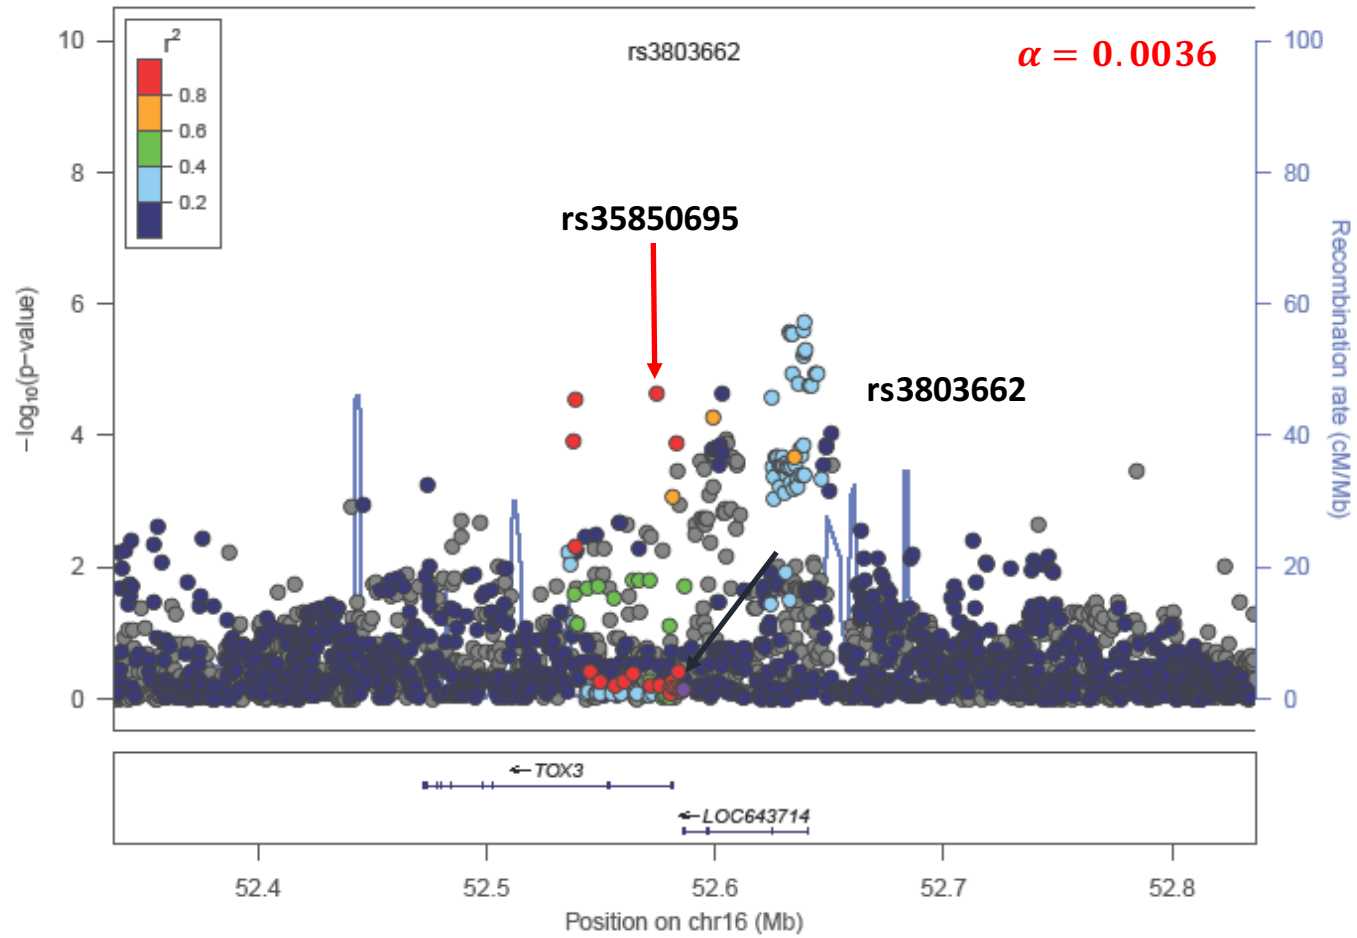

(e) 16q12/TOX3  
(iv) ER+ Cases vs. Controls (AFR)

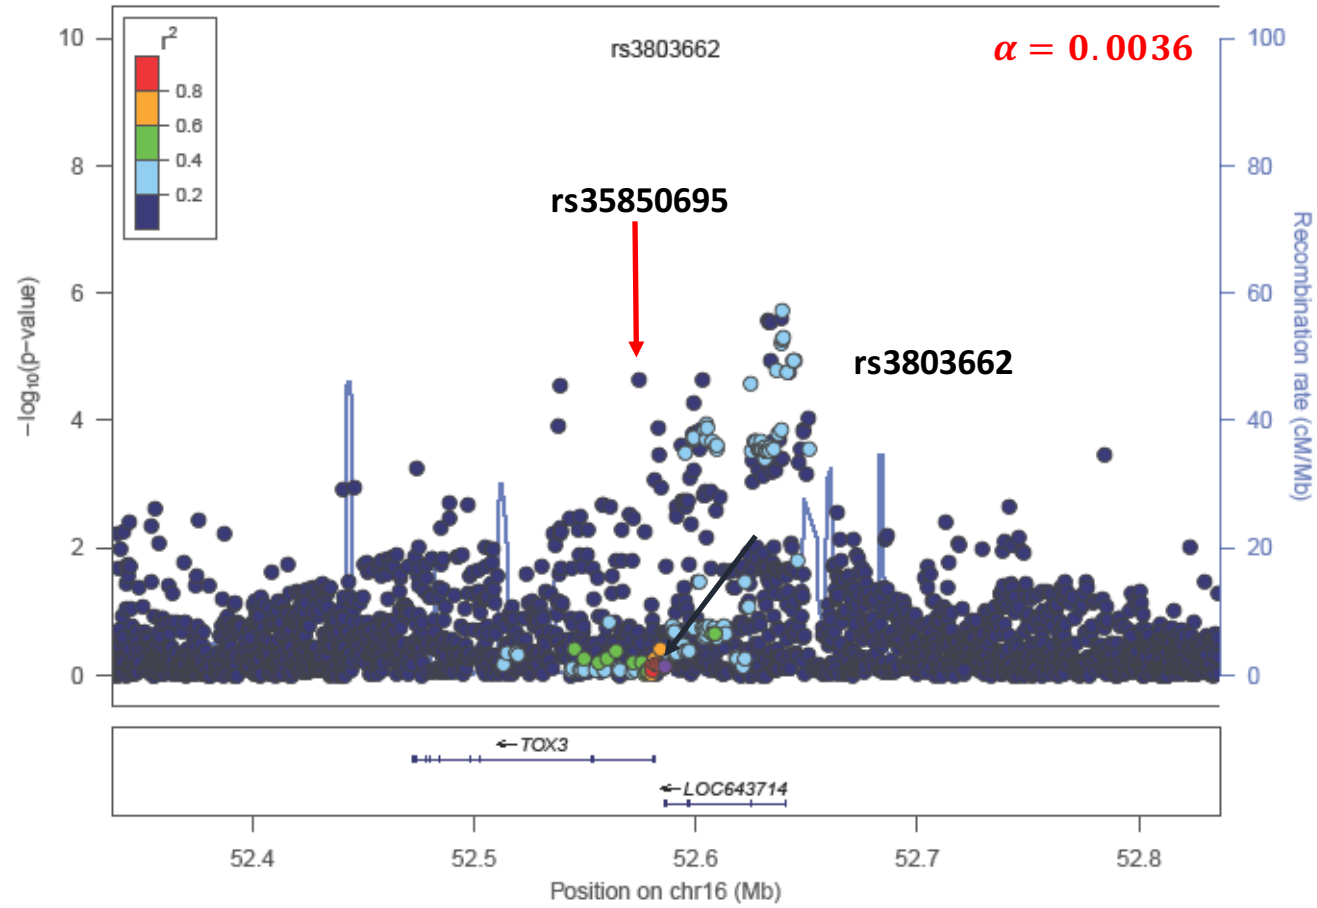

(e) 16q12/TOX3  
(v) ER- Cases vs. Controls (EUR)

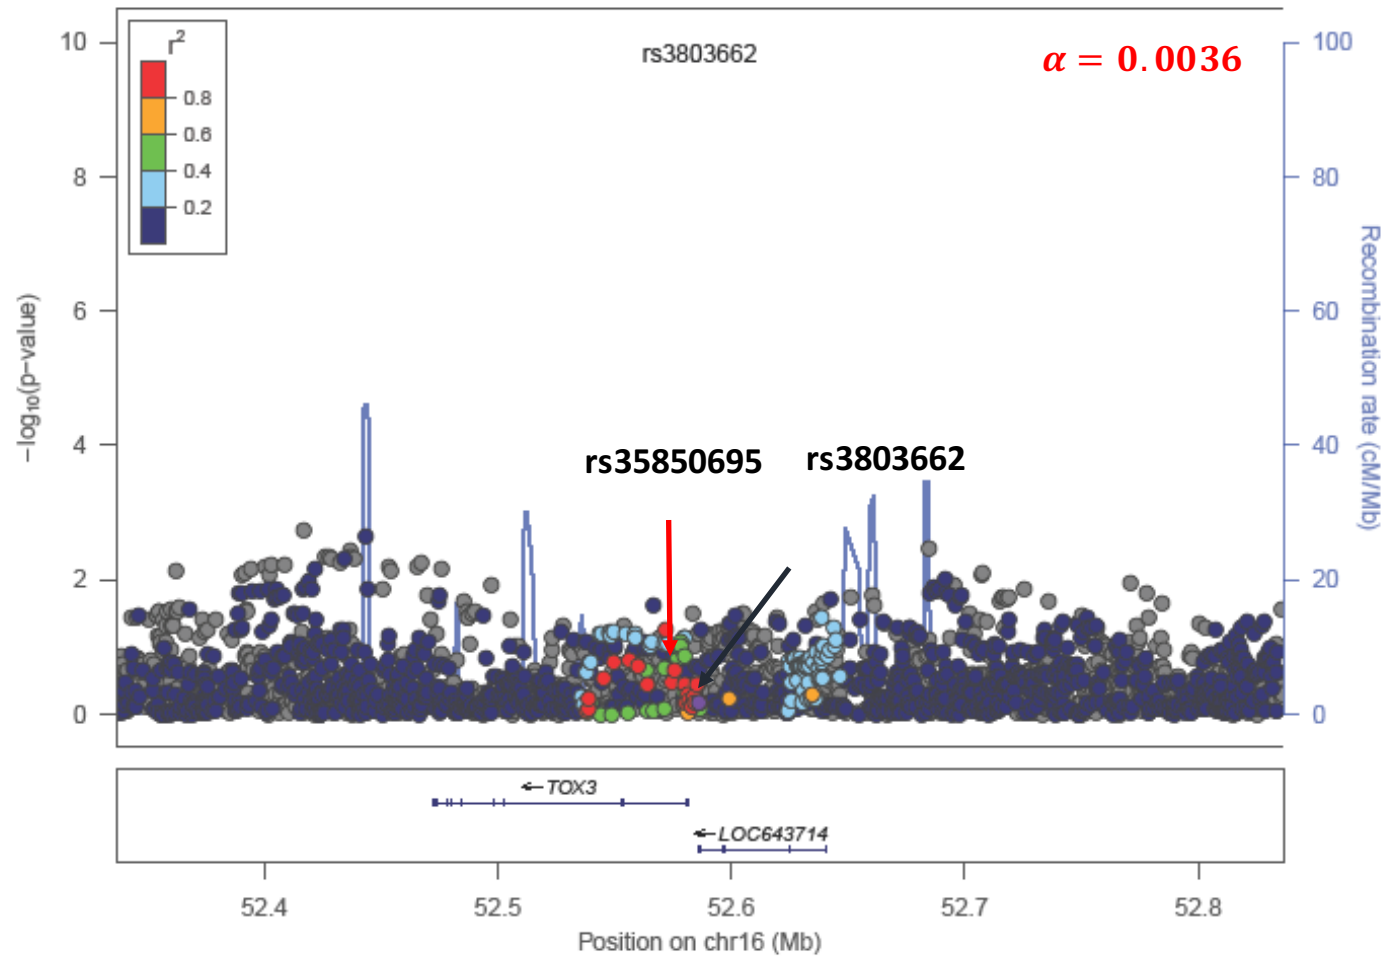

- (e) 16q12/TOX3
- (vi) ER- Cases vs. Controls (AFR)

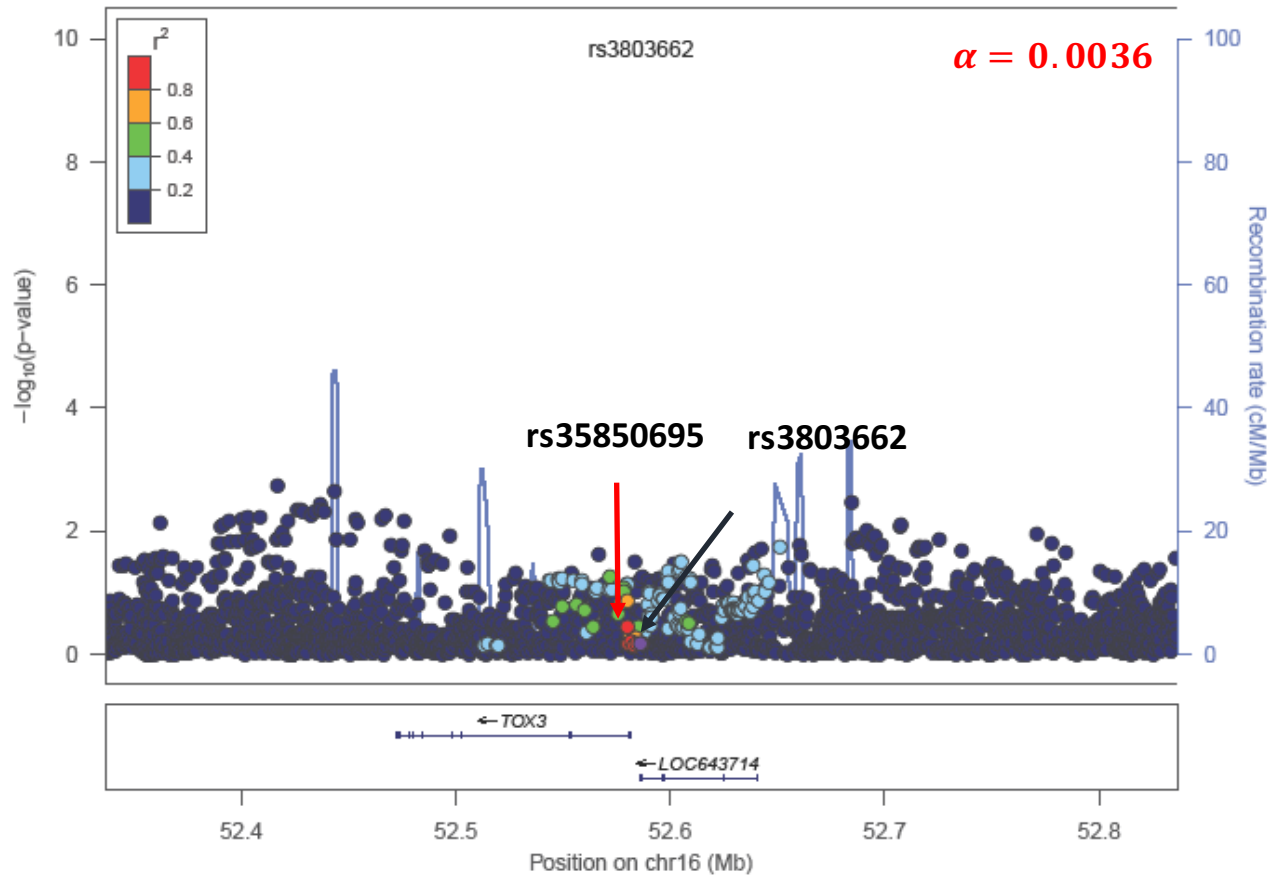

(f) 16q12/FTO

(i) All Cases vs. Controls (EUR)

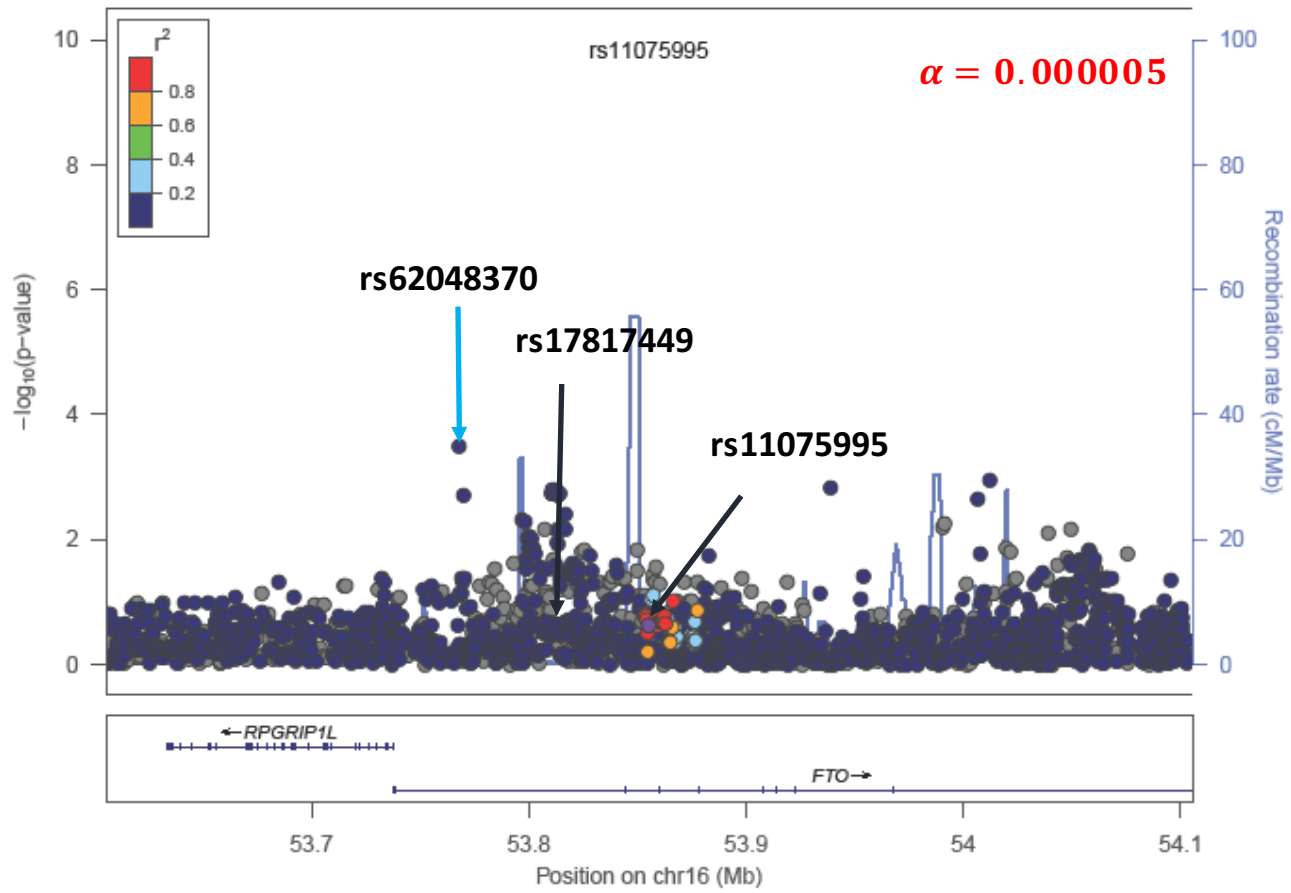

(f) 16q12/FTO  
(ii) All Cases vs. Controls (AFR)

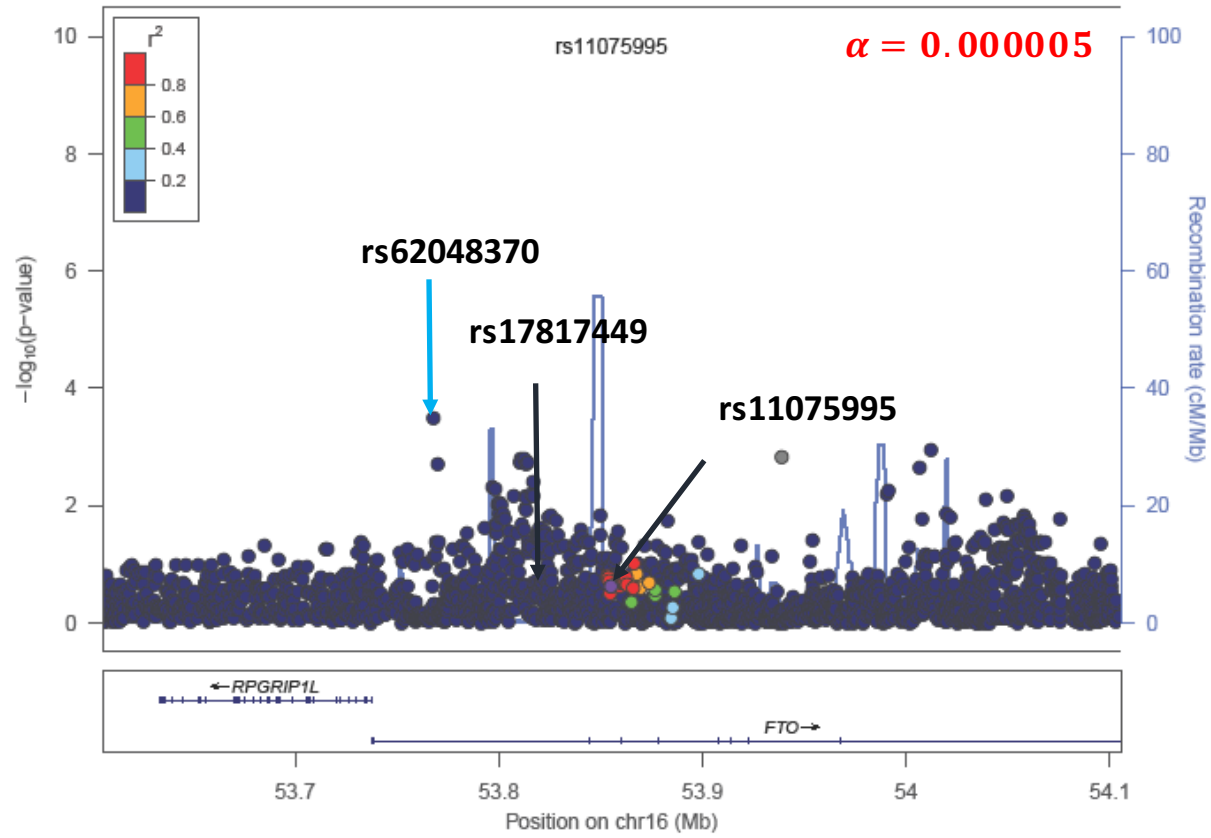



(f) 16q12/FTO  
(iii) ER+ Cases vs. Controls (EUR)

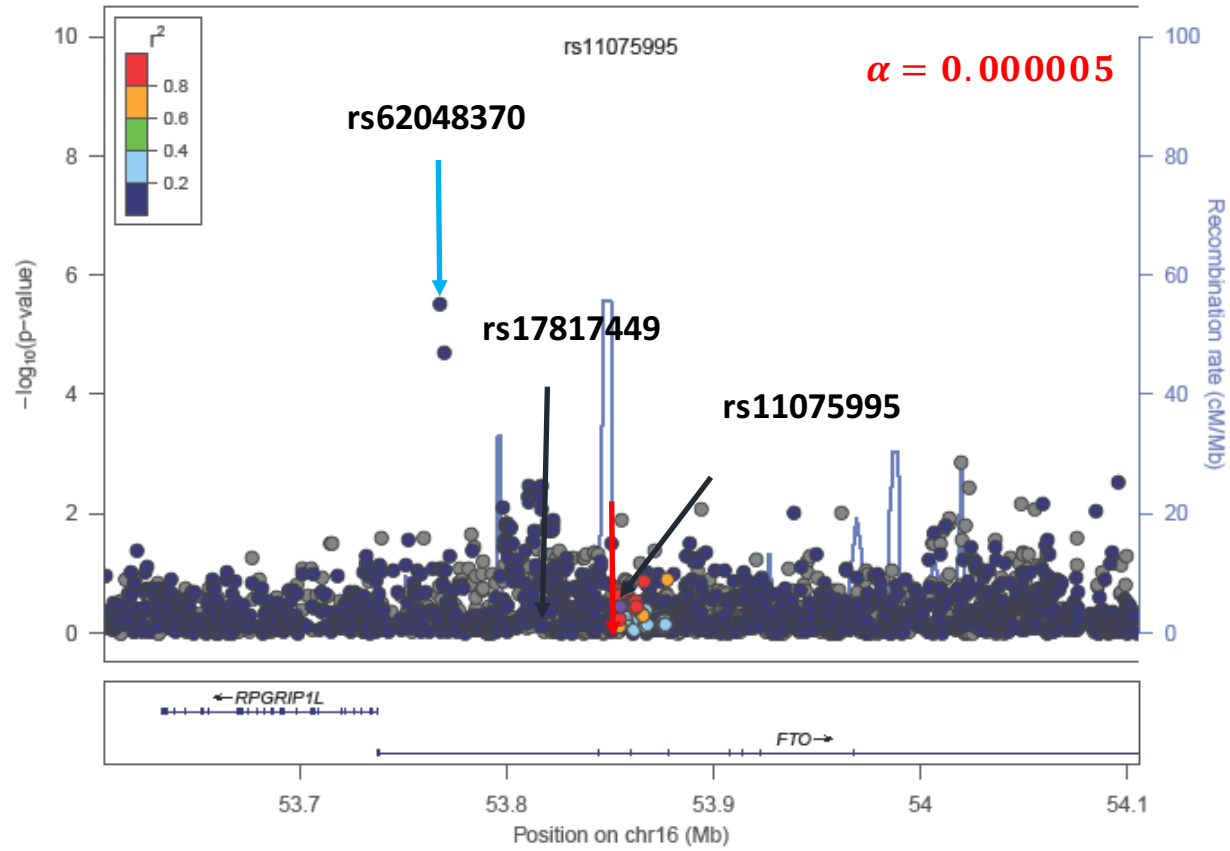

(f) 16q12/FTO  
(iv) ER+ Cases vs. Controls (AFR)

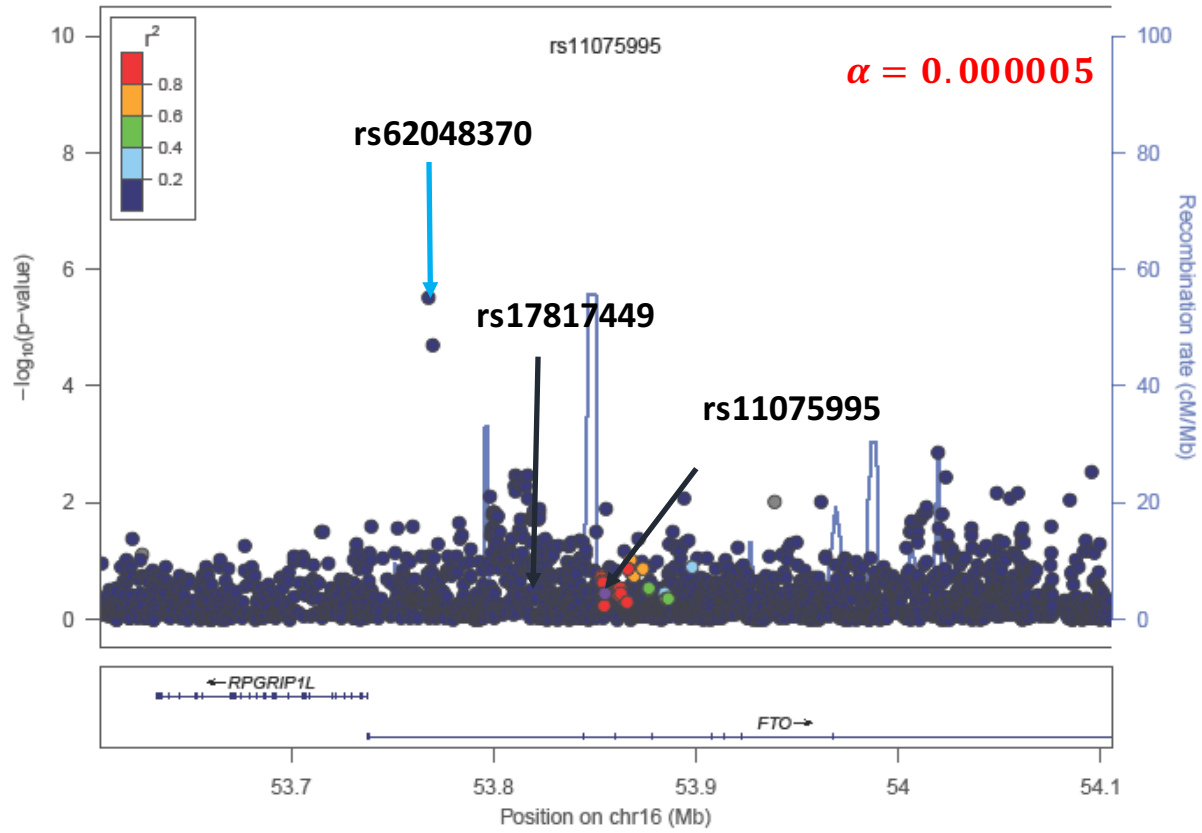

(f) 16q12/FTO  
(vi) ER- Cases vs. Controls (EUR)

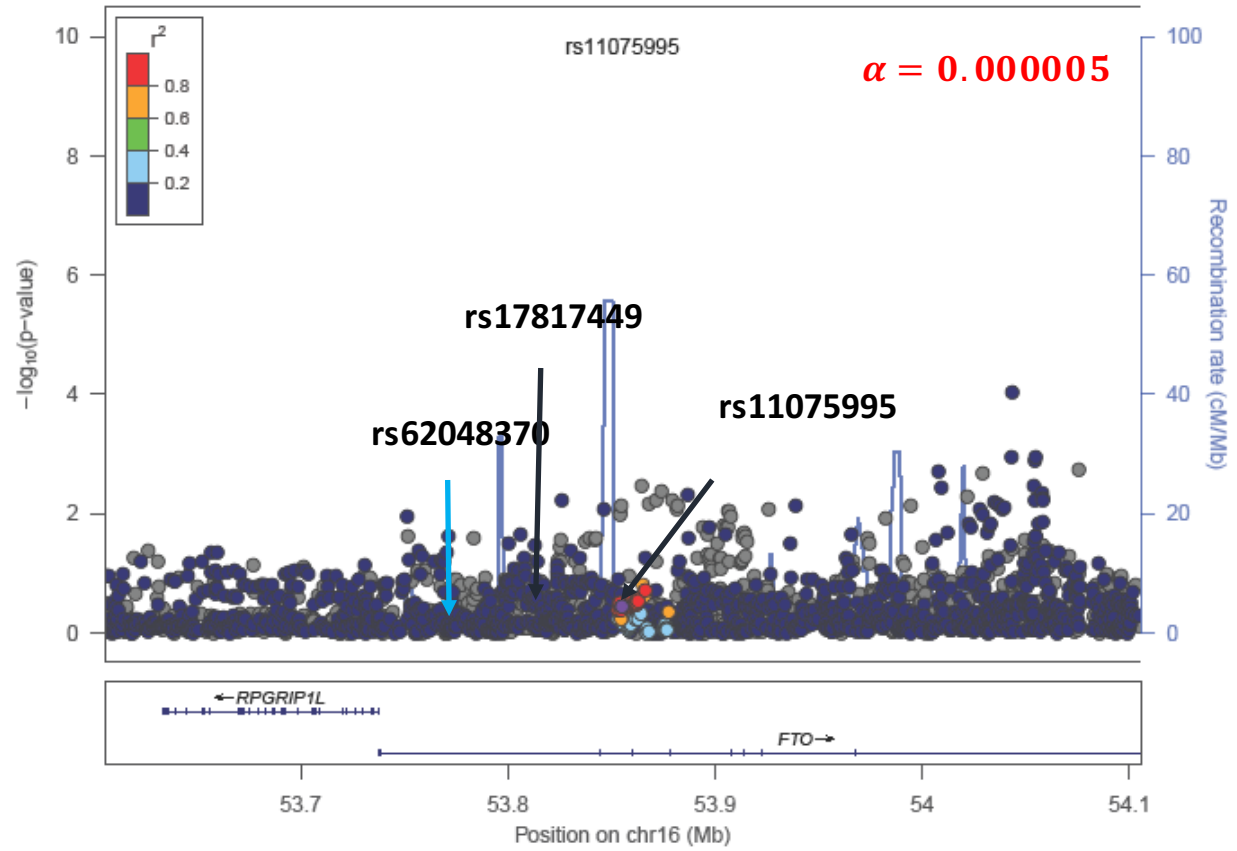

(f) 16q12/FTO

(vi) ER- Cases vs. Controls (AFR)

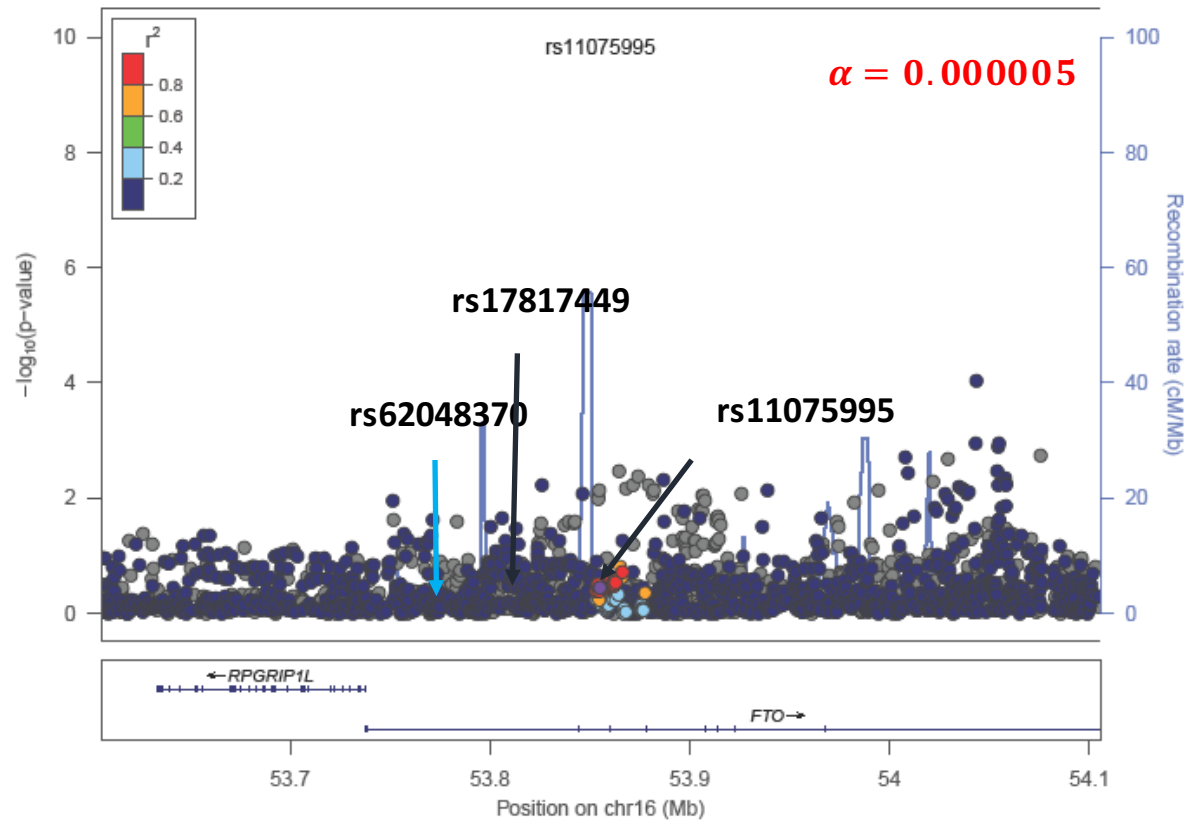

(g) 16q23

(i) All Cases vs. Controls (EUR)

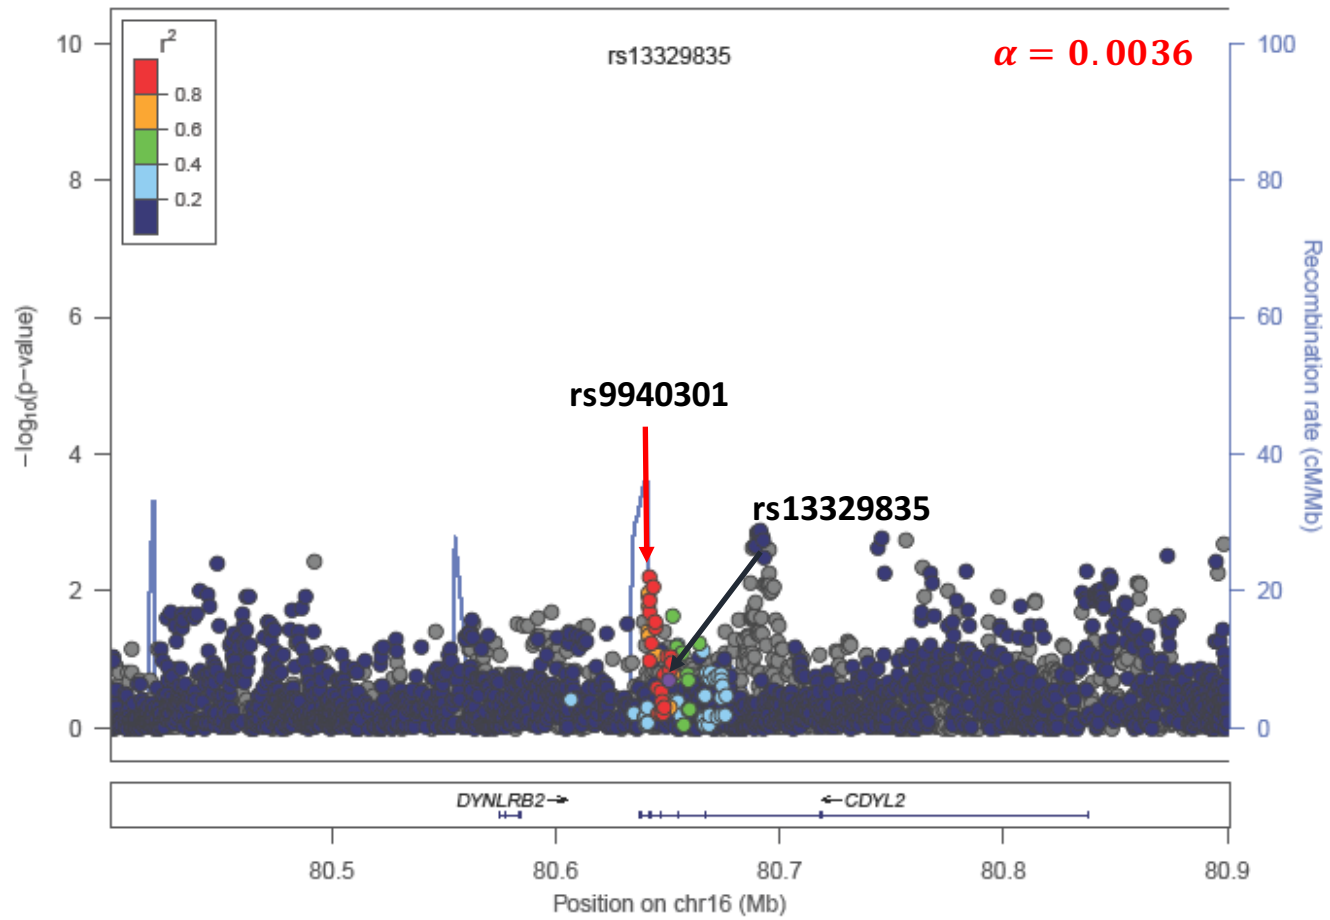

(g) 16q23

(ii) All Cases vs. Controls (AFR)

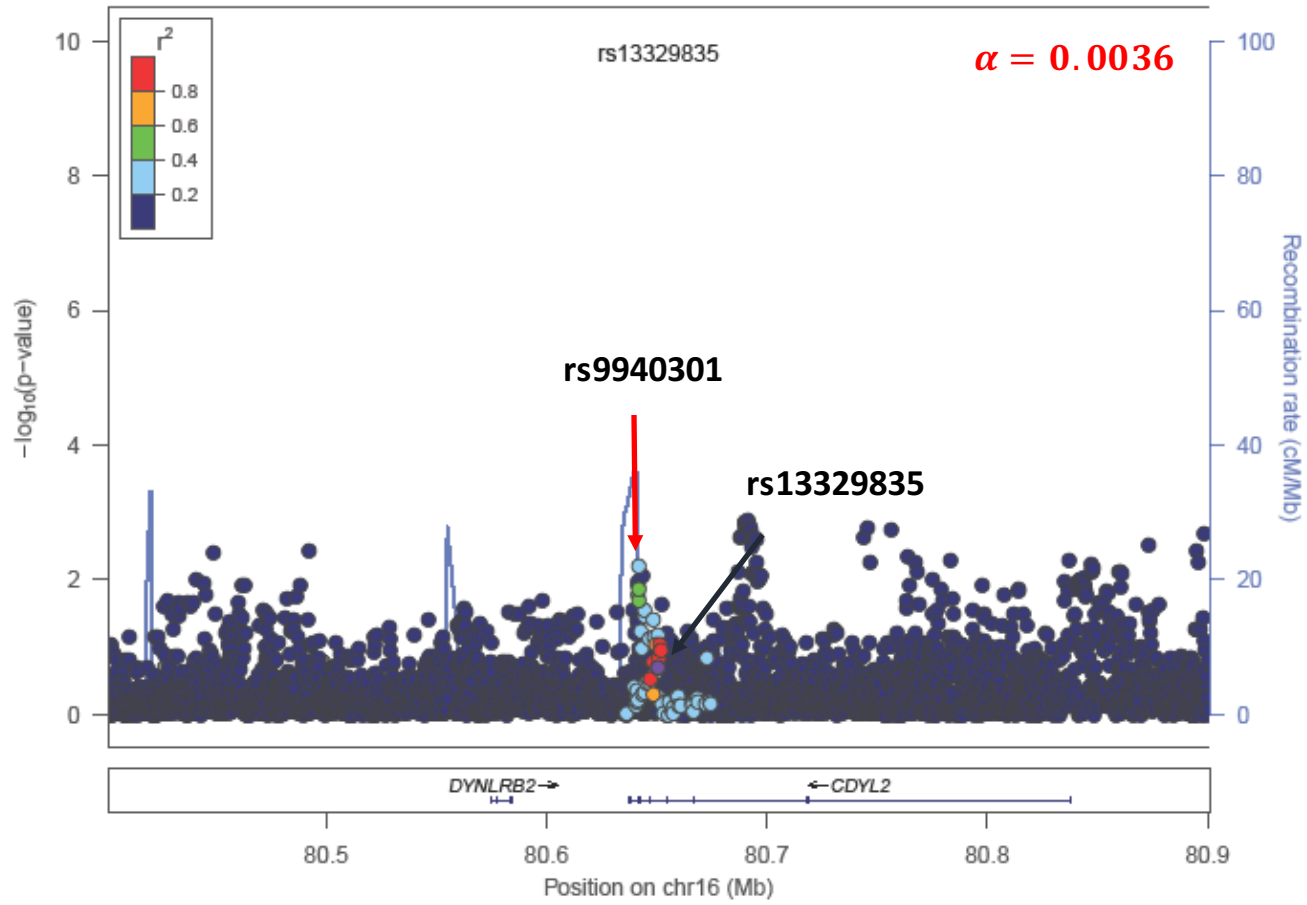

(g) 16q23

(iii) ER+ Cases vs. Controls (EUR)

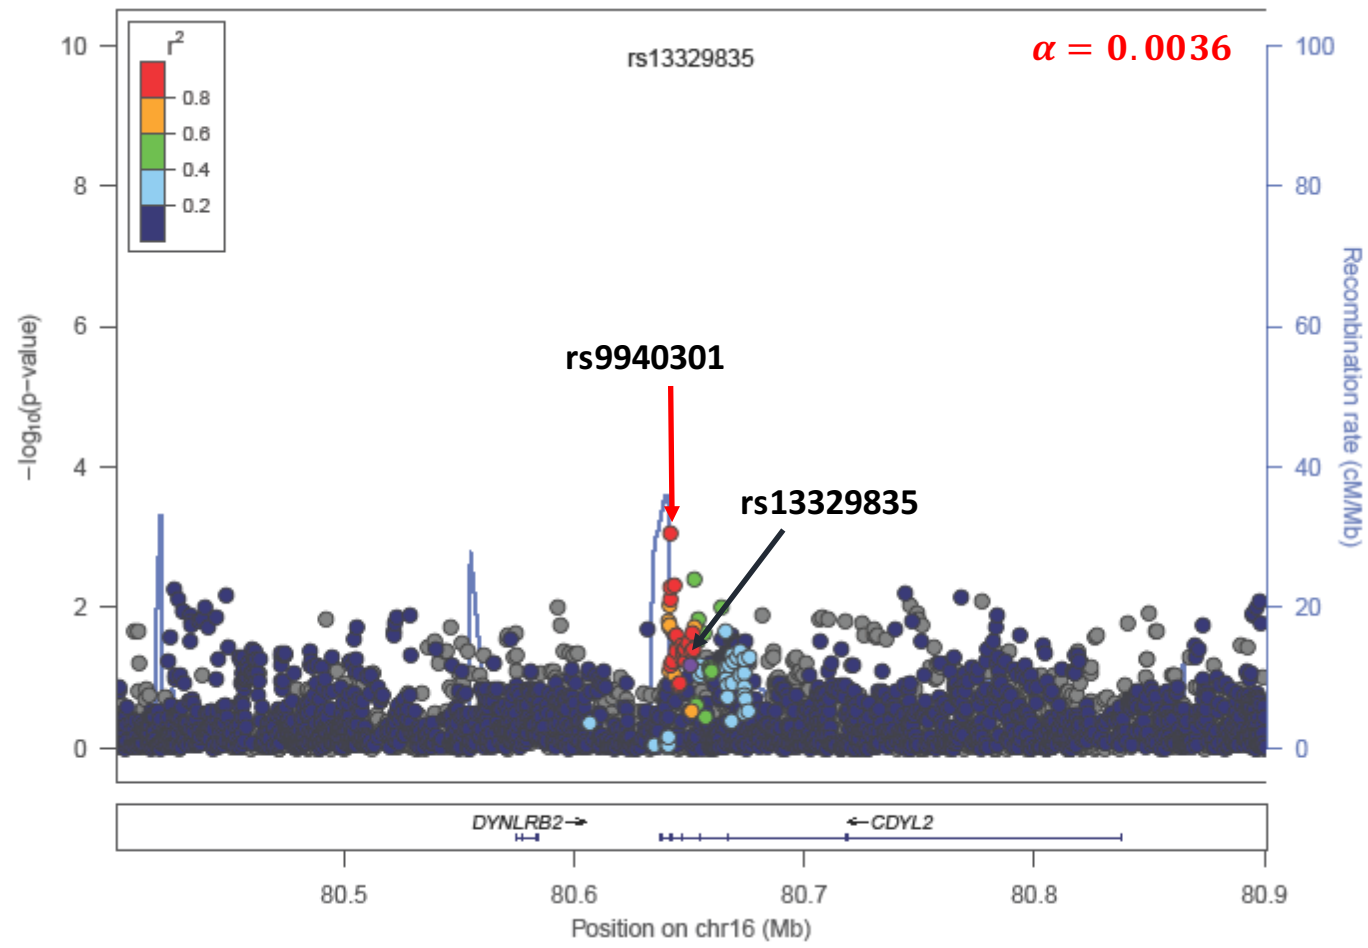

(g) 16q23

(iv) ER+ Cases vs. Controls (AFR)

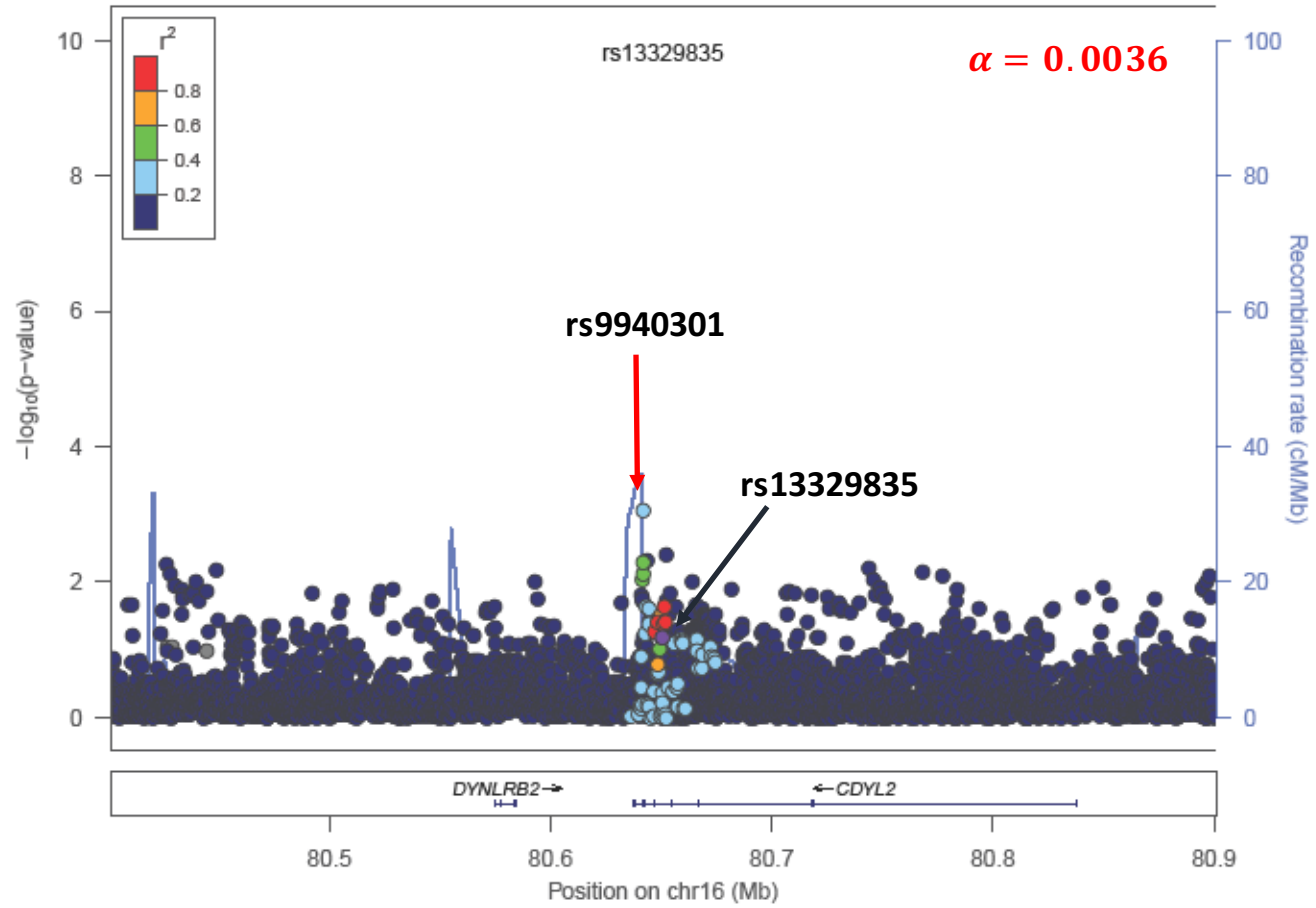



(g) 16q23  
(v) ER- Cases vs. Controls (EUR)

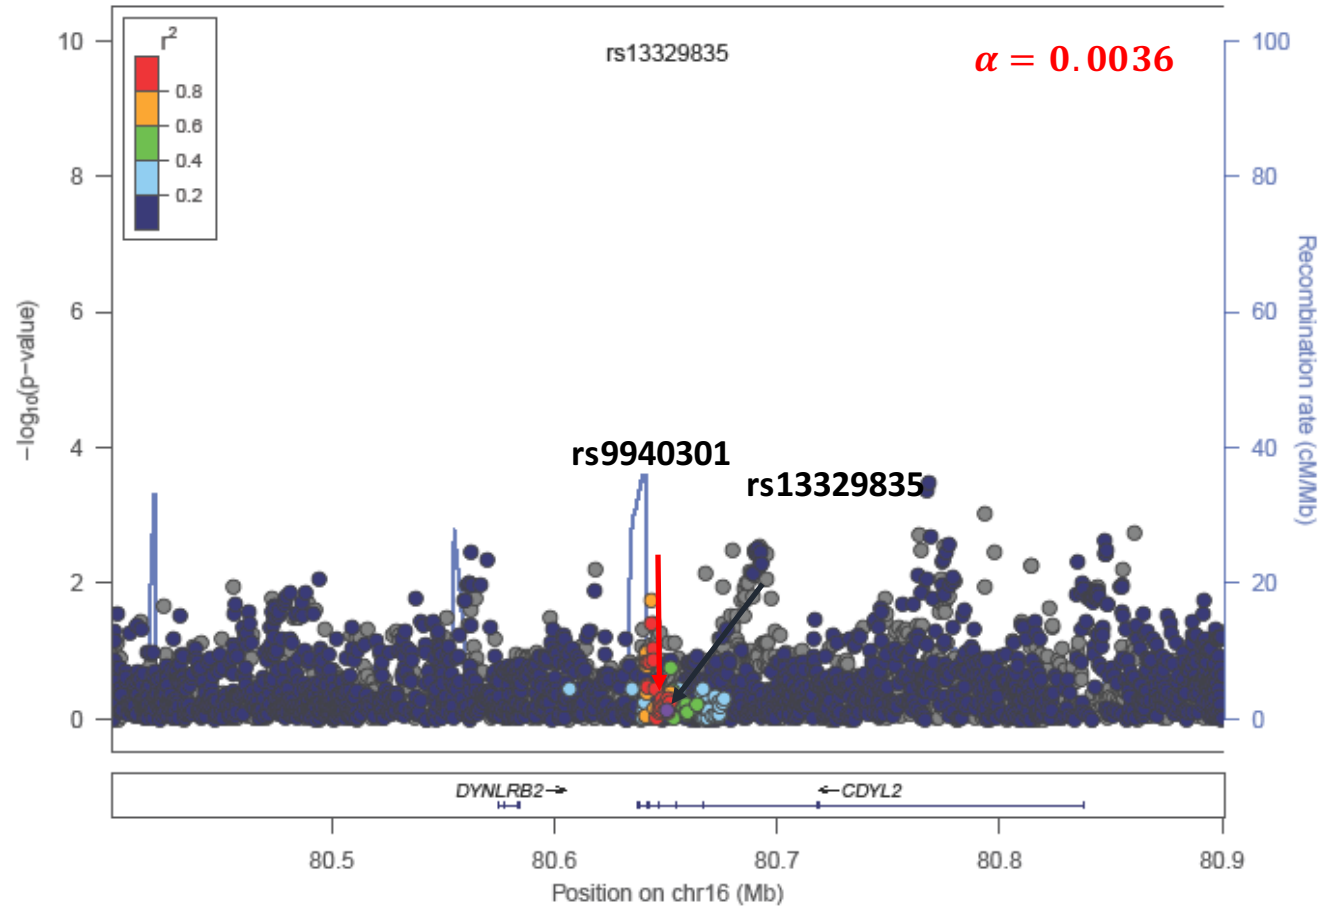

(g) 16q23

(vi) ER- Cases vs. Controls (AFR)

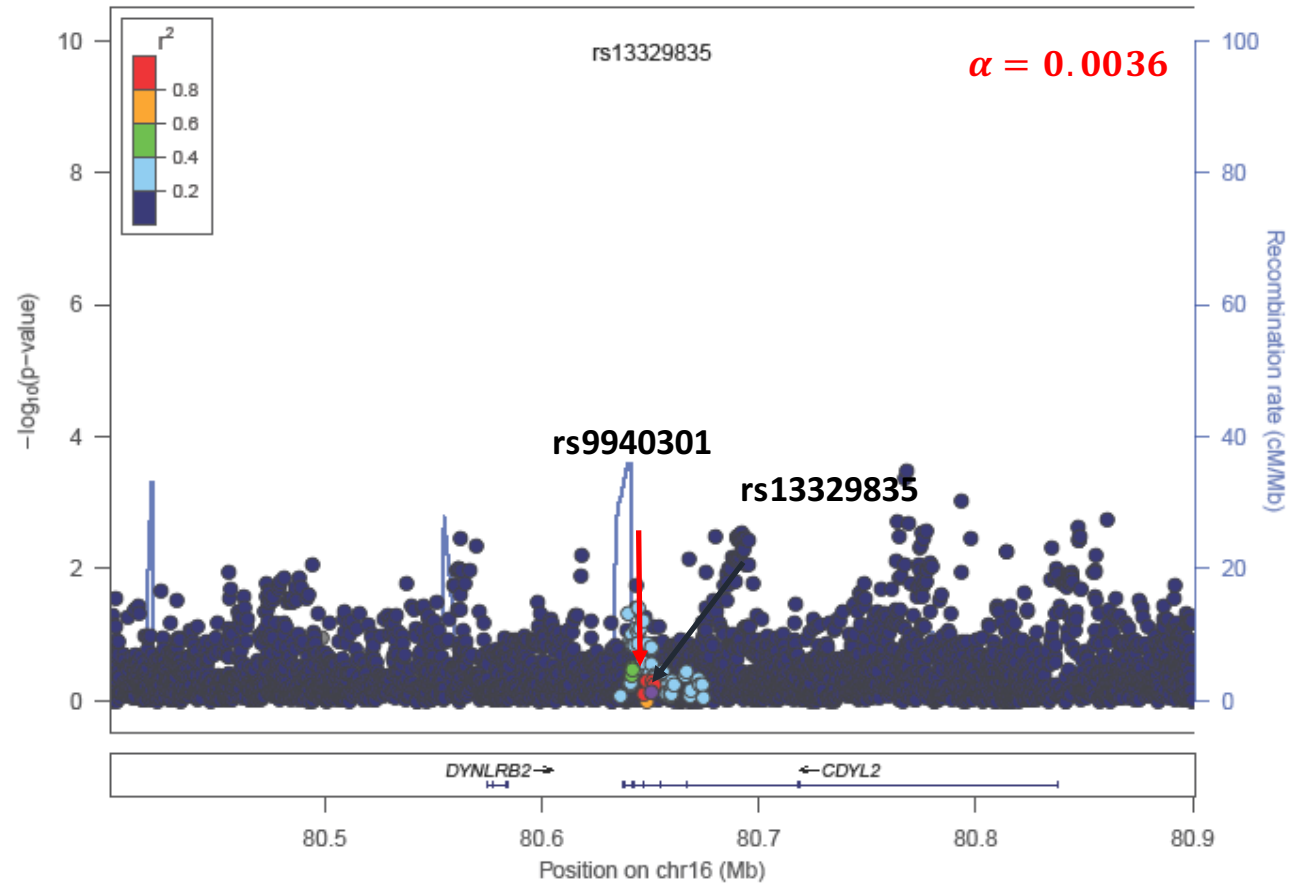

(h)19p13

(i) All Cases vs. Controls (EUR)

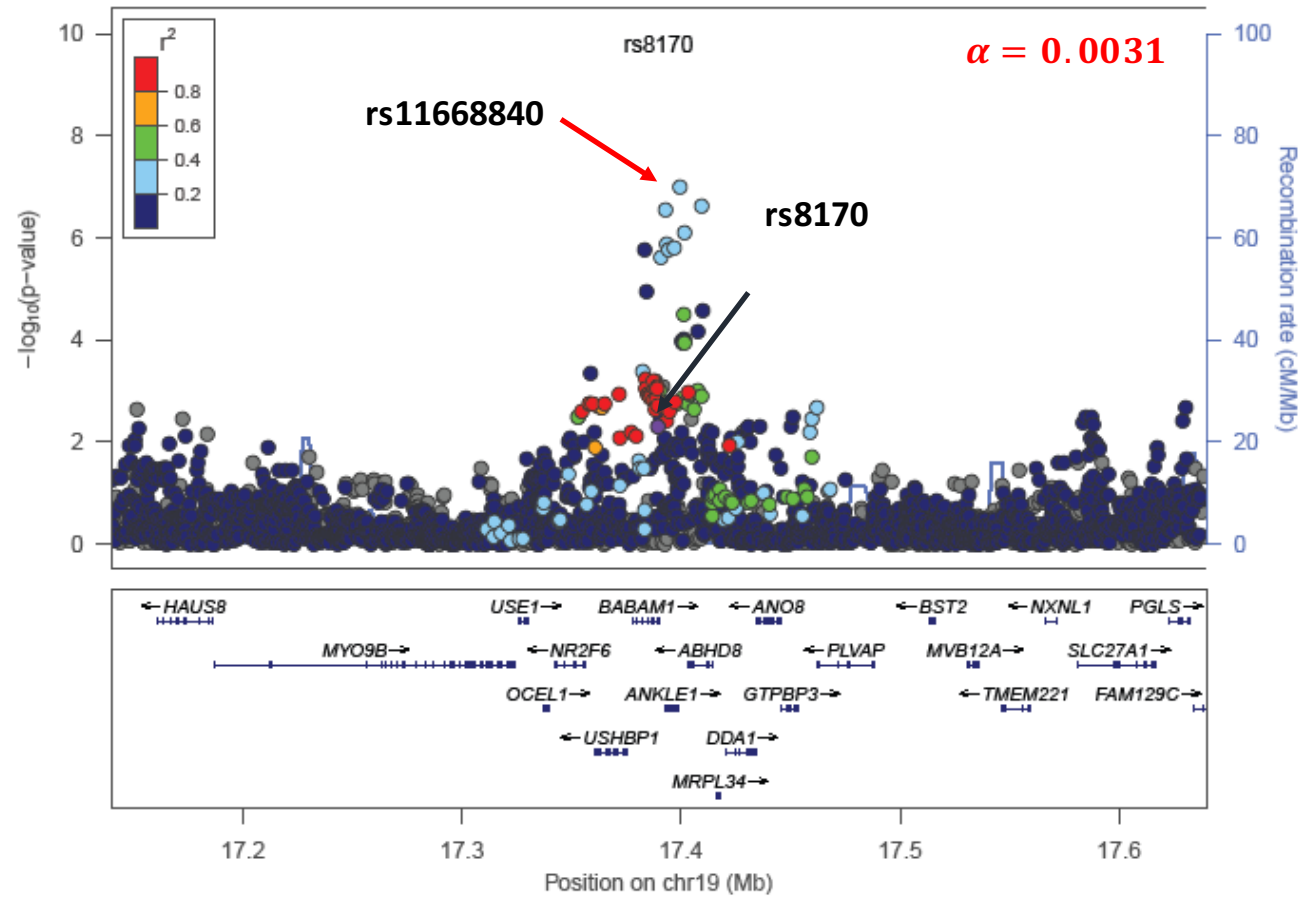

(h)19p13

(ii) All Cases vs. Controls (AFR)

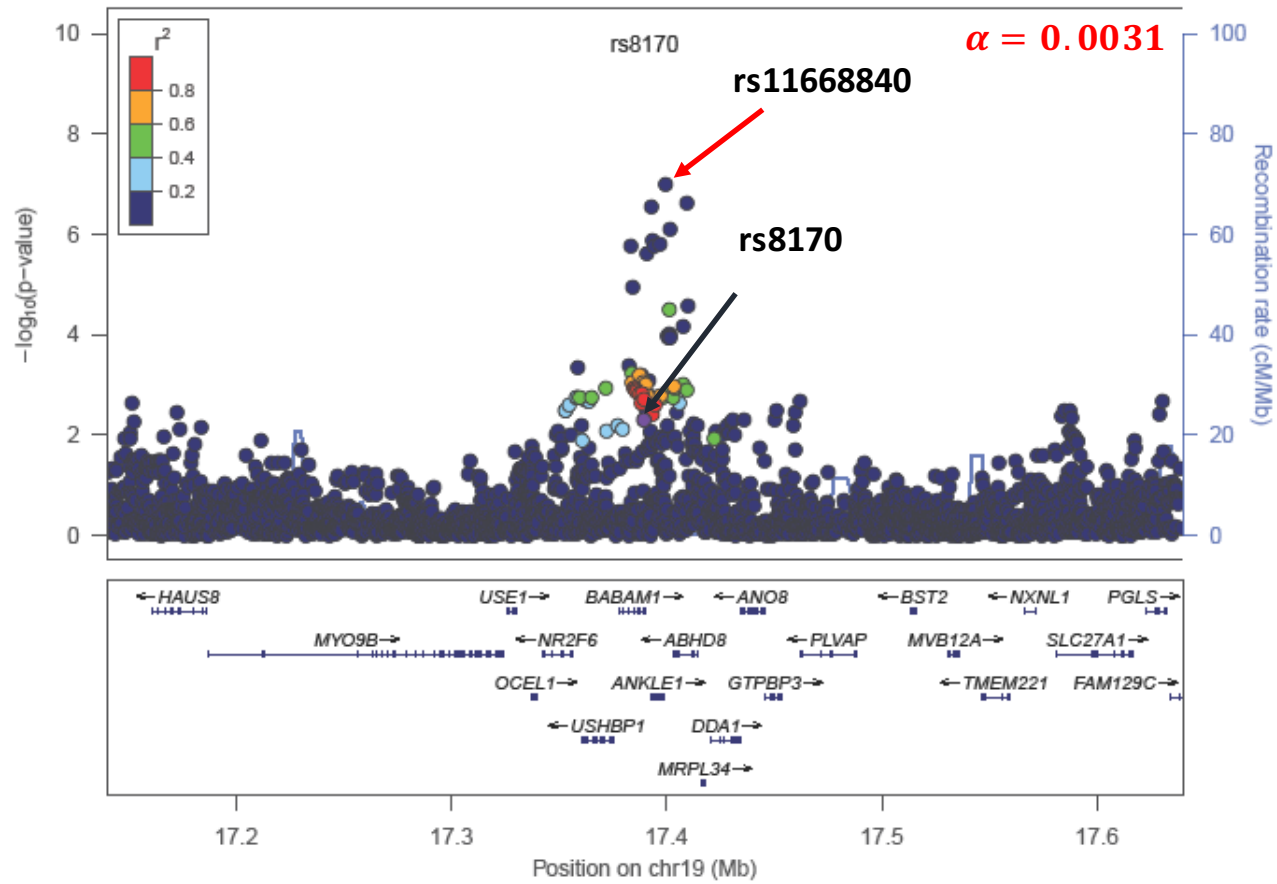

(h)19p13

(iii) ER+ Cases vs. Controls (EUR)

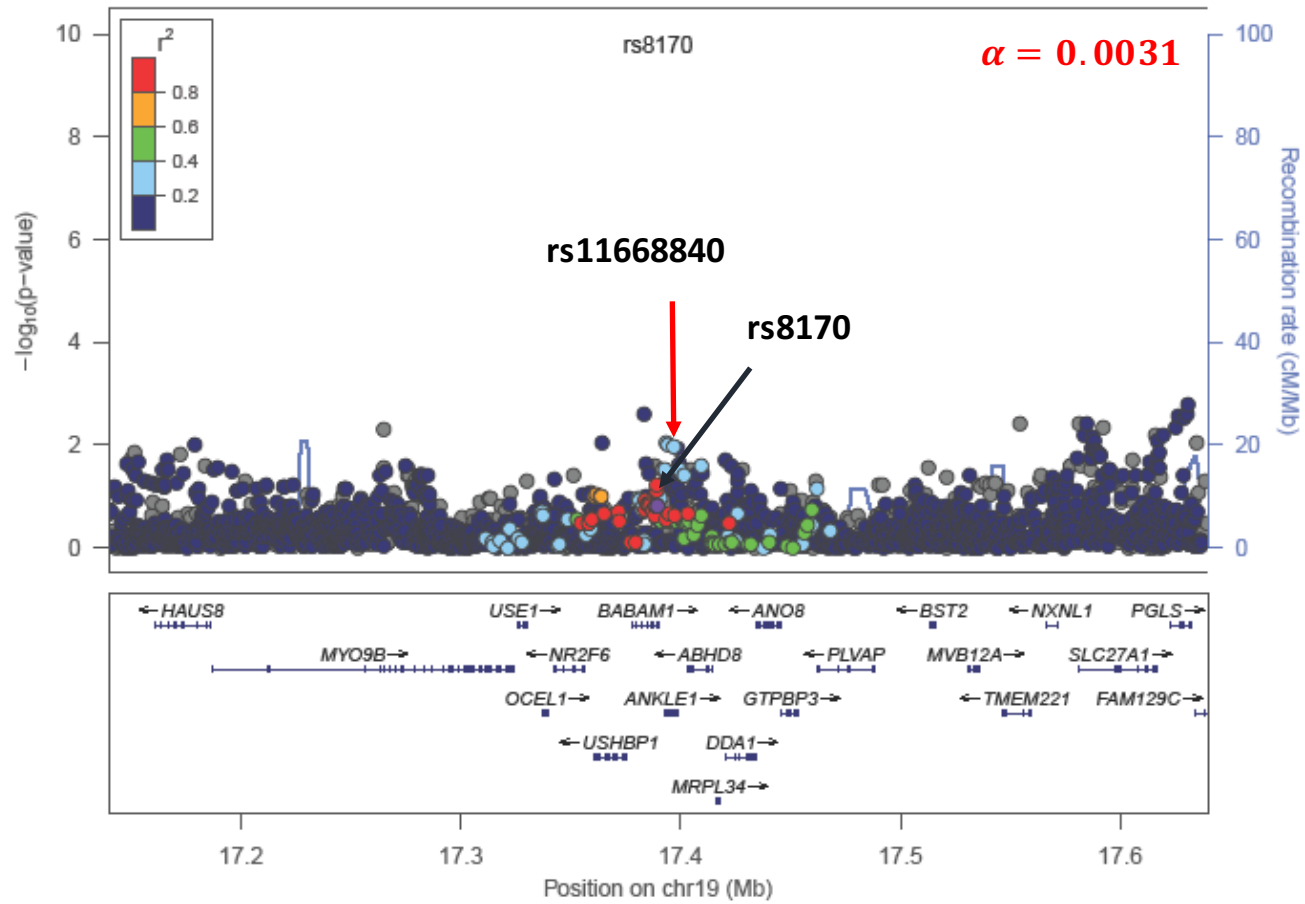

(h)19p13

(iv) ER+ Cases vs. Controls (AFR)

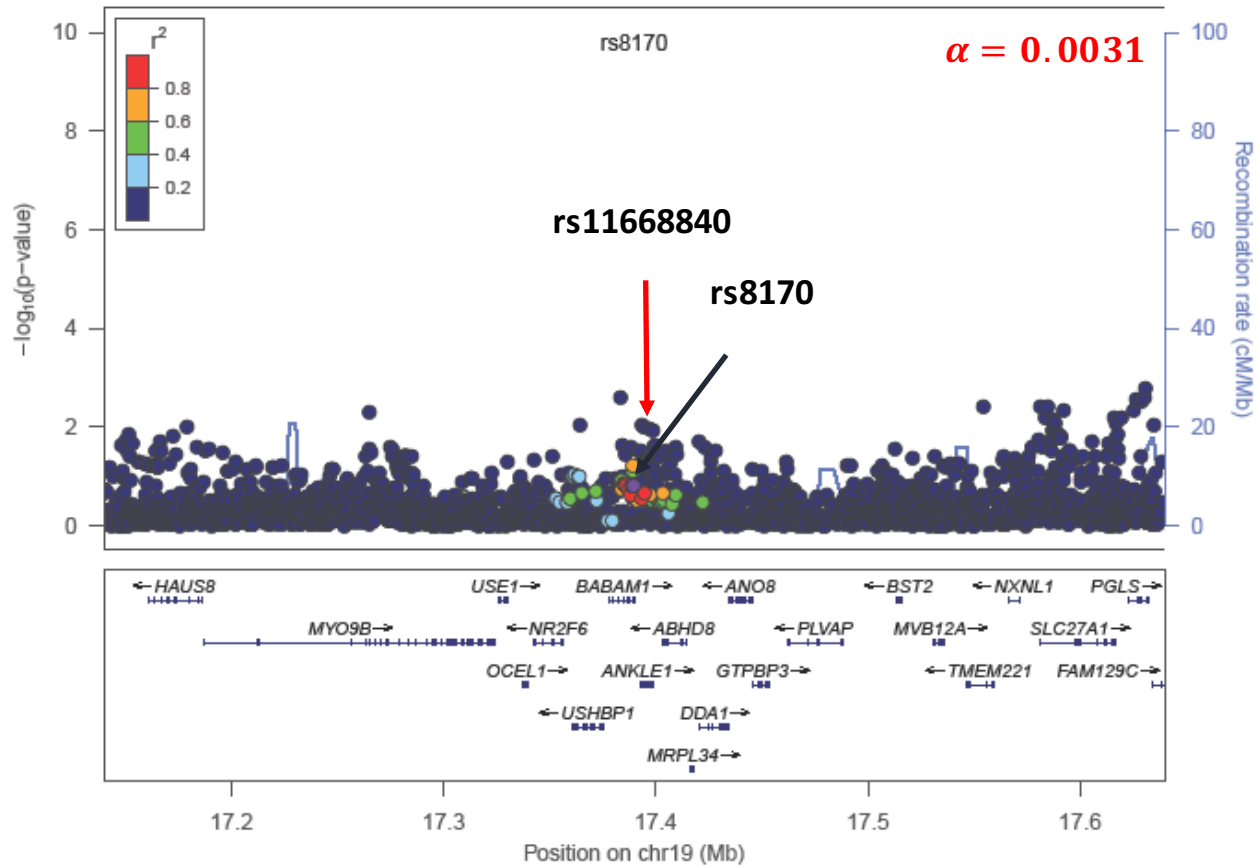

(h)19p13

(v) ER- Cases vs. Controls (EUR)

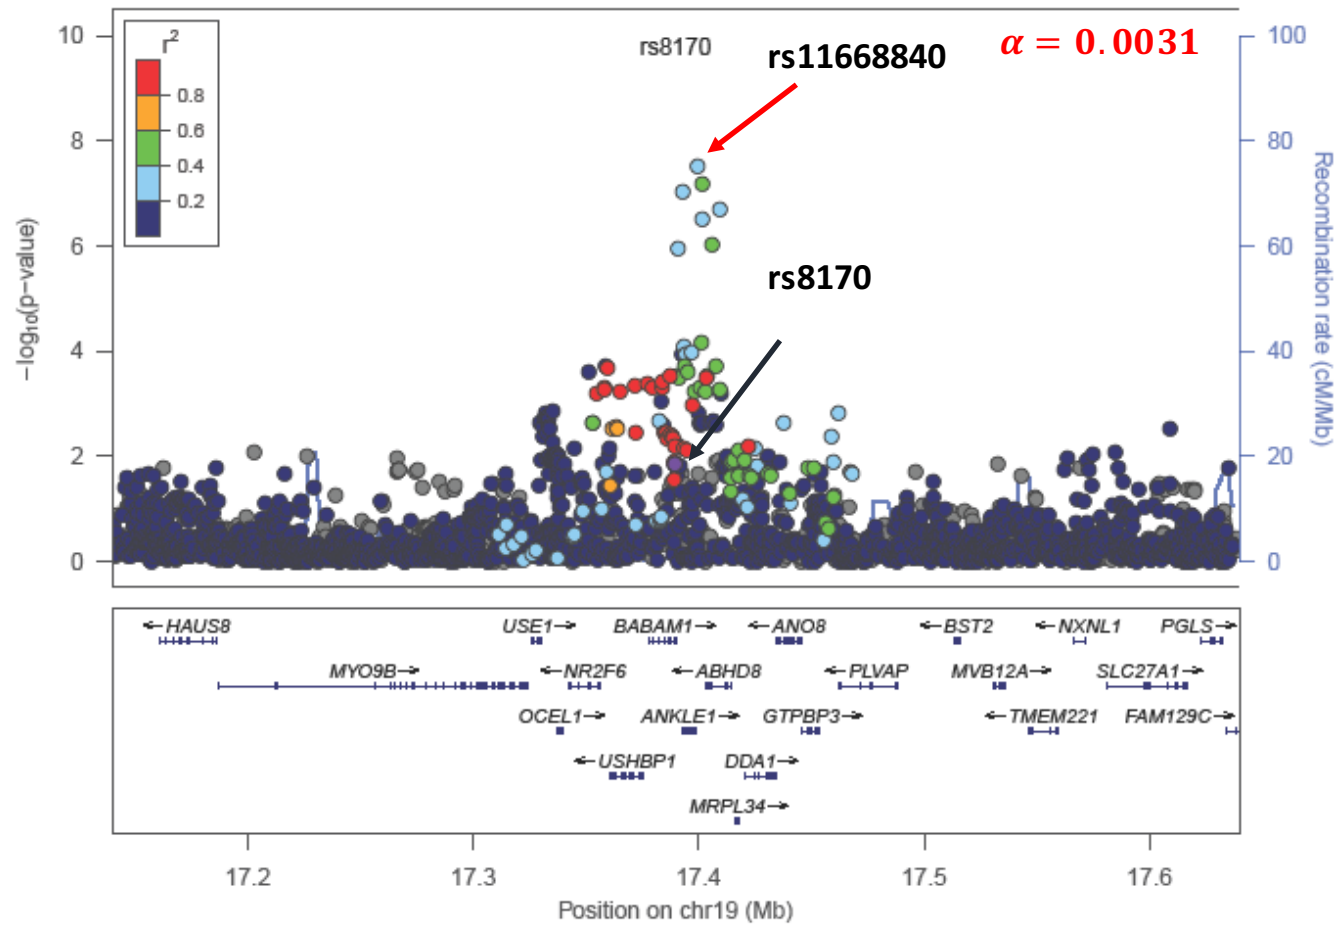

(h)19p13

(vi) ER- Cases vs. Controls (AFR)

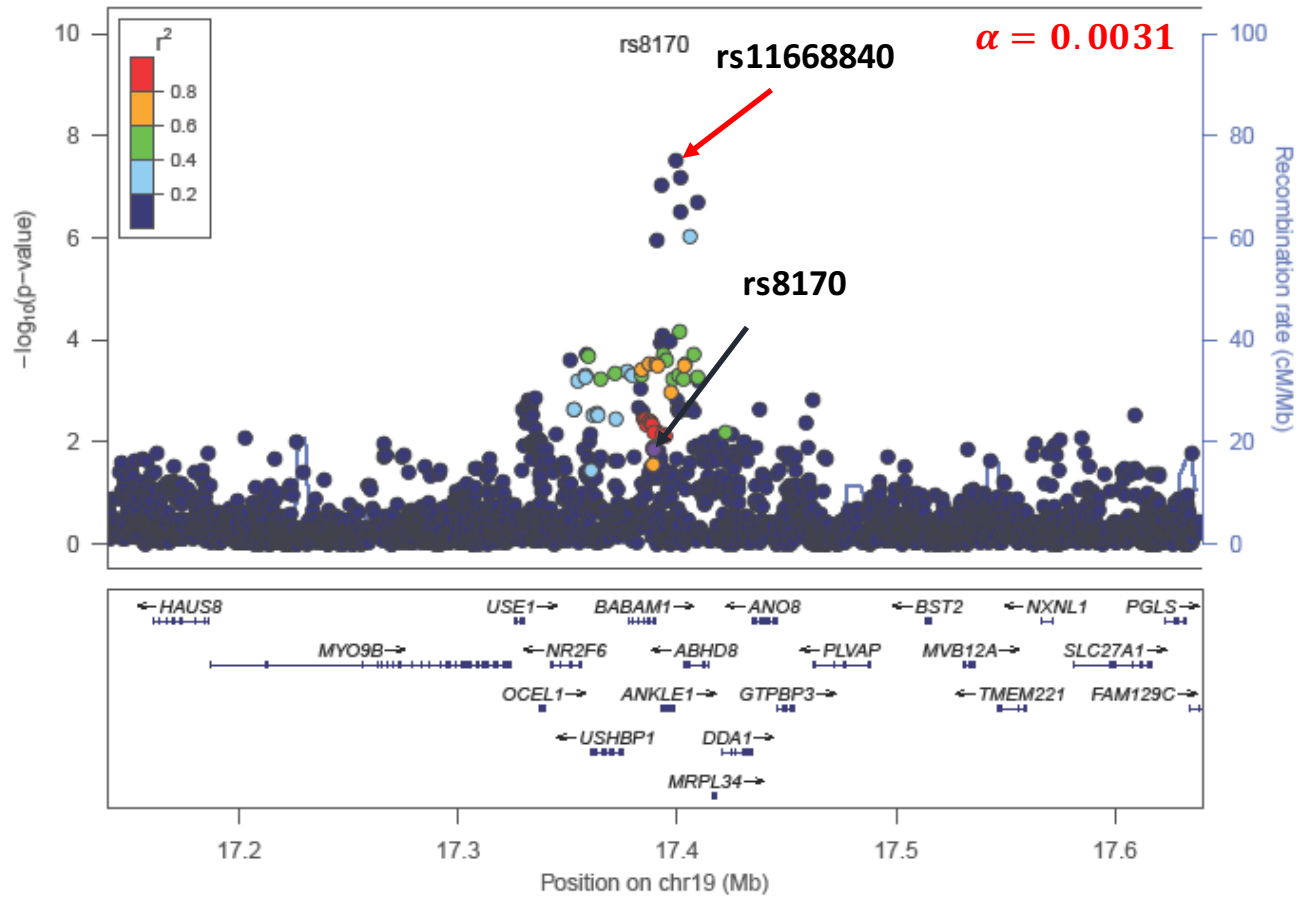

Supplement: NIHMS862401-supplement-8.pdf [file NIHMS862401-supplement-8.pdf]
