# Supplementary material
Source: PubMed Central journal article supplement (PMC5500414)

# Supplementary Figure S2

## (a) 3p24

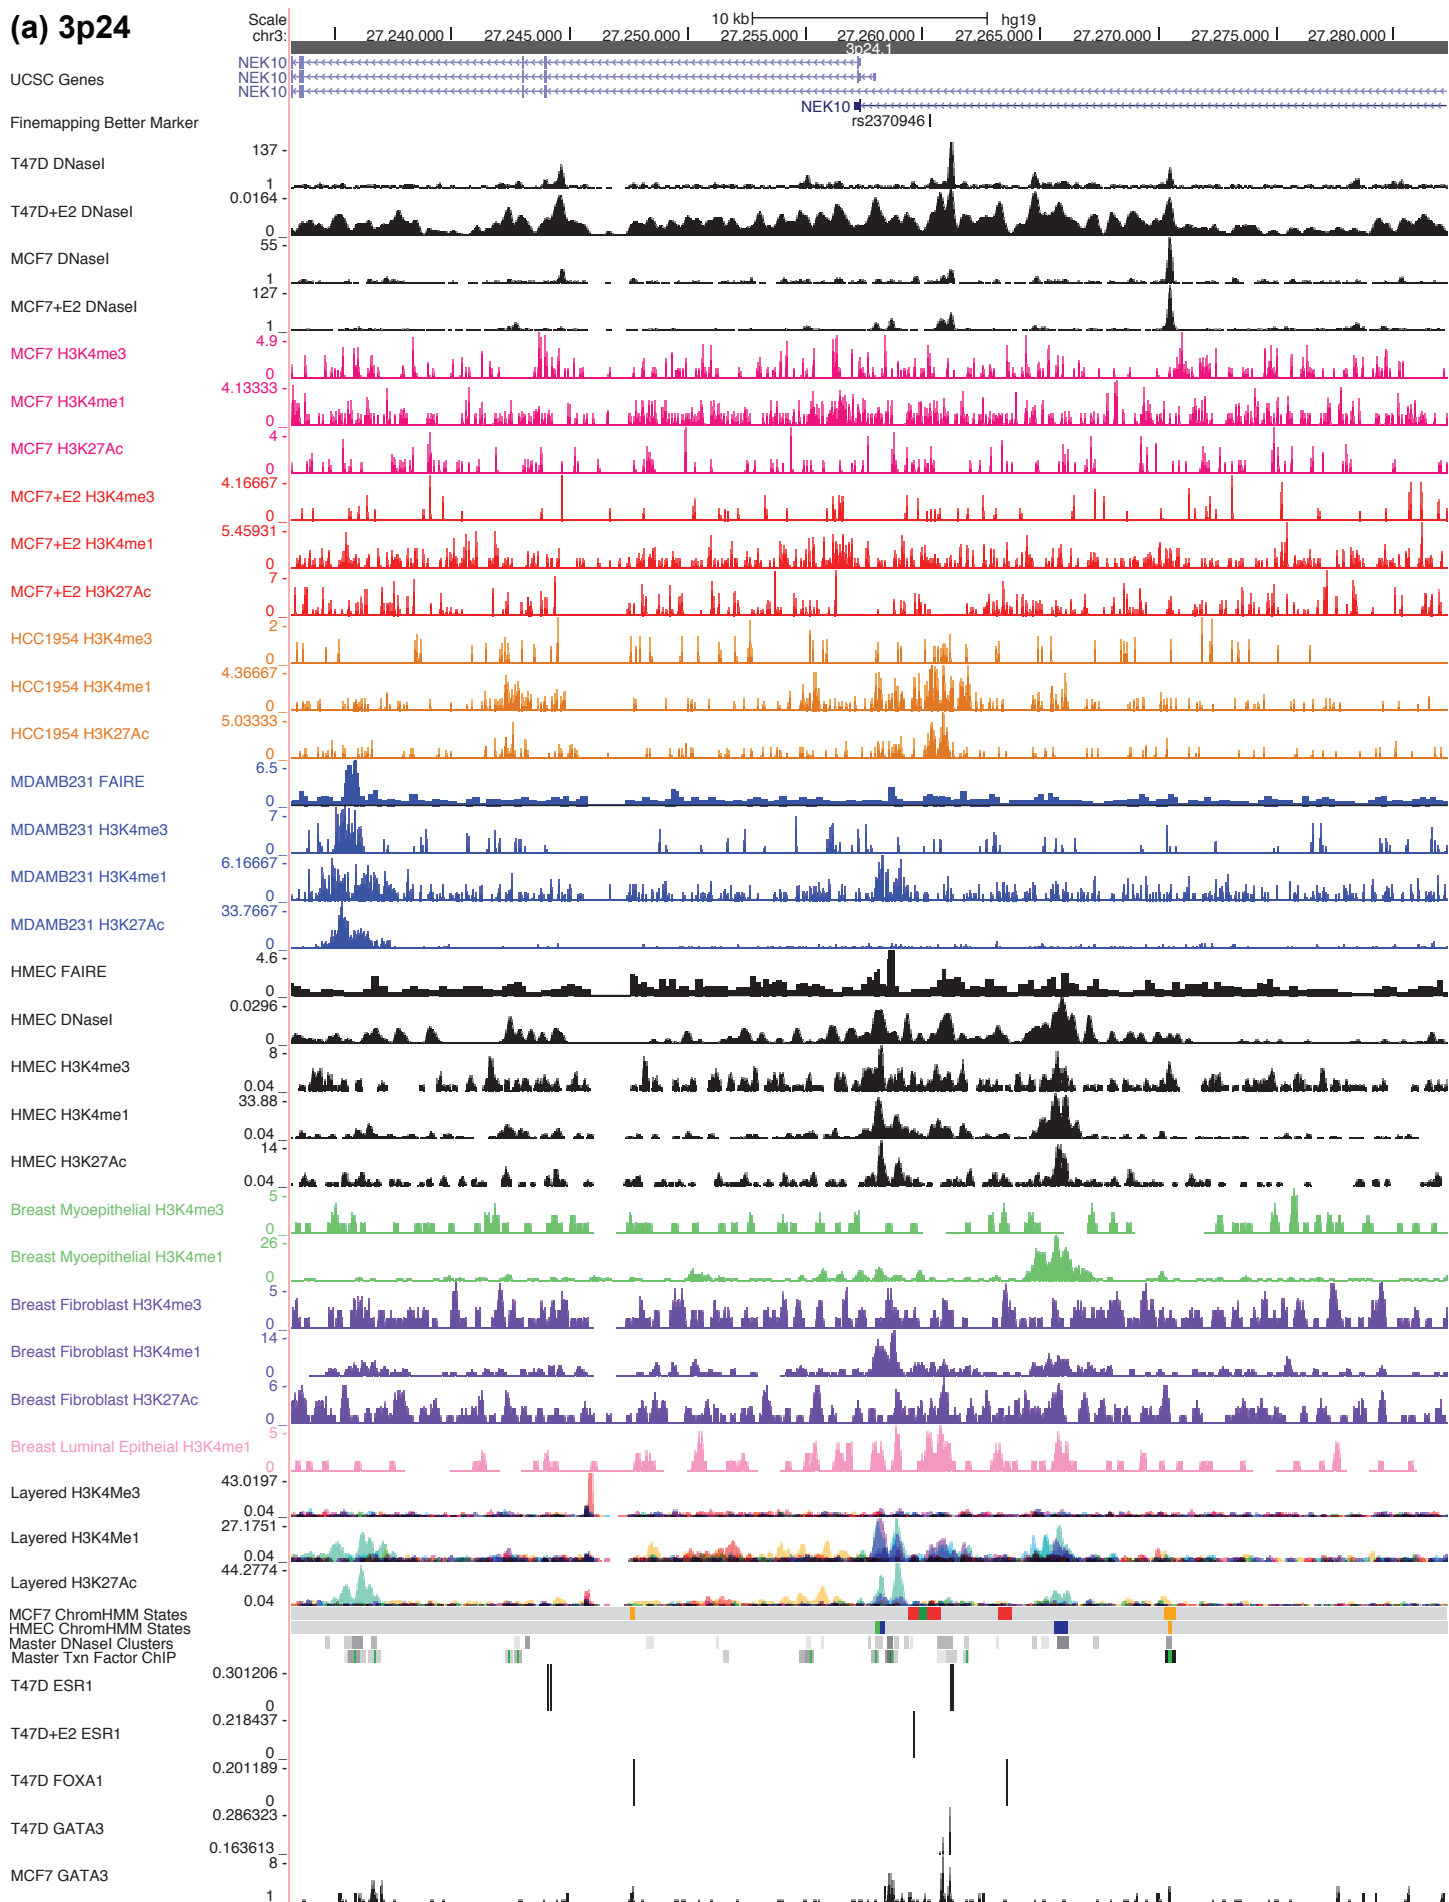

# (b) 11q13

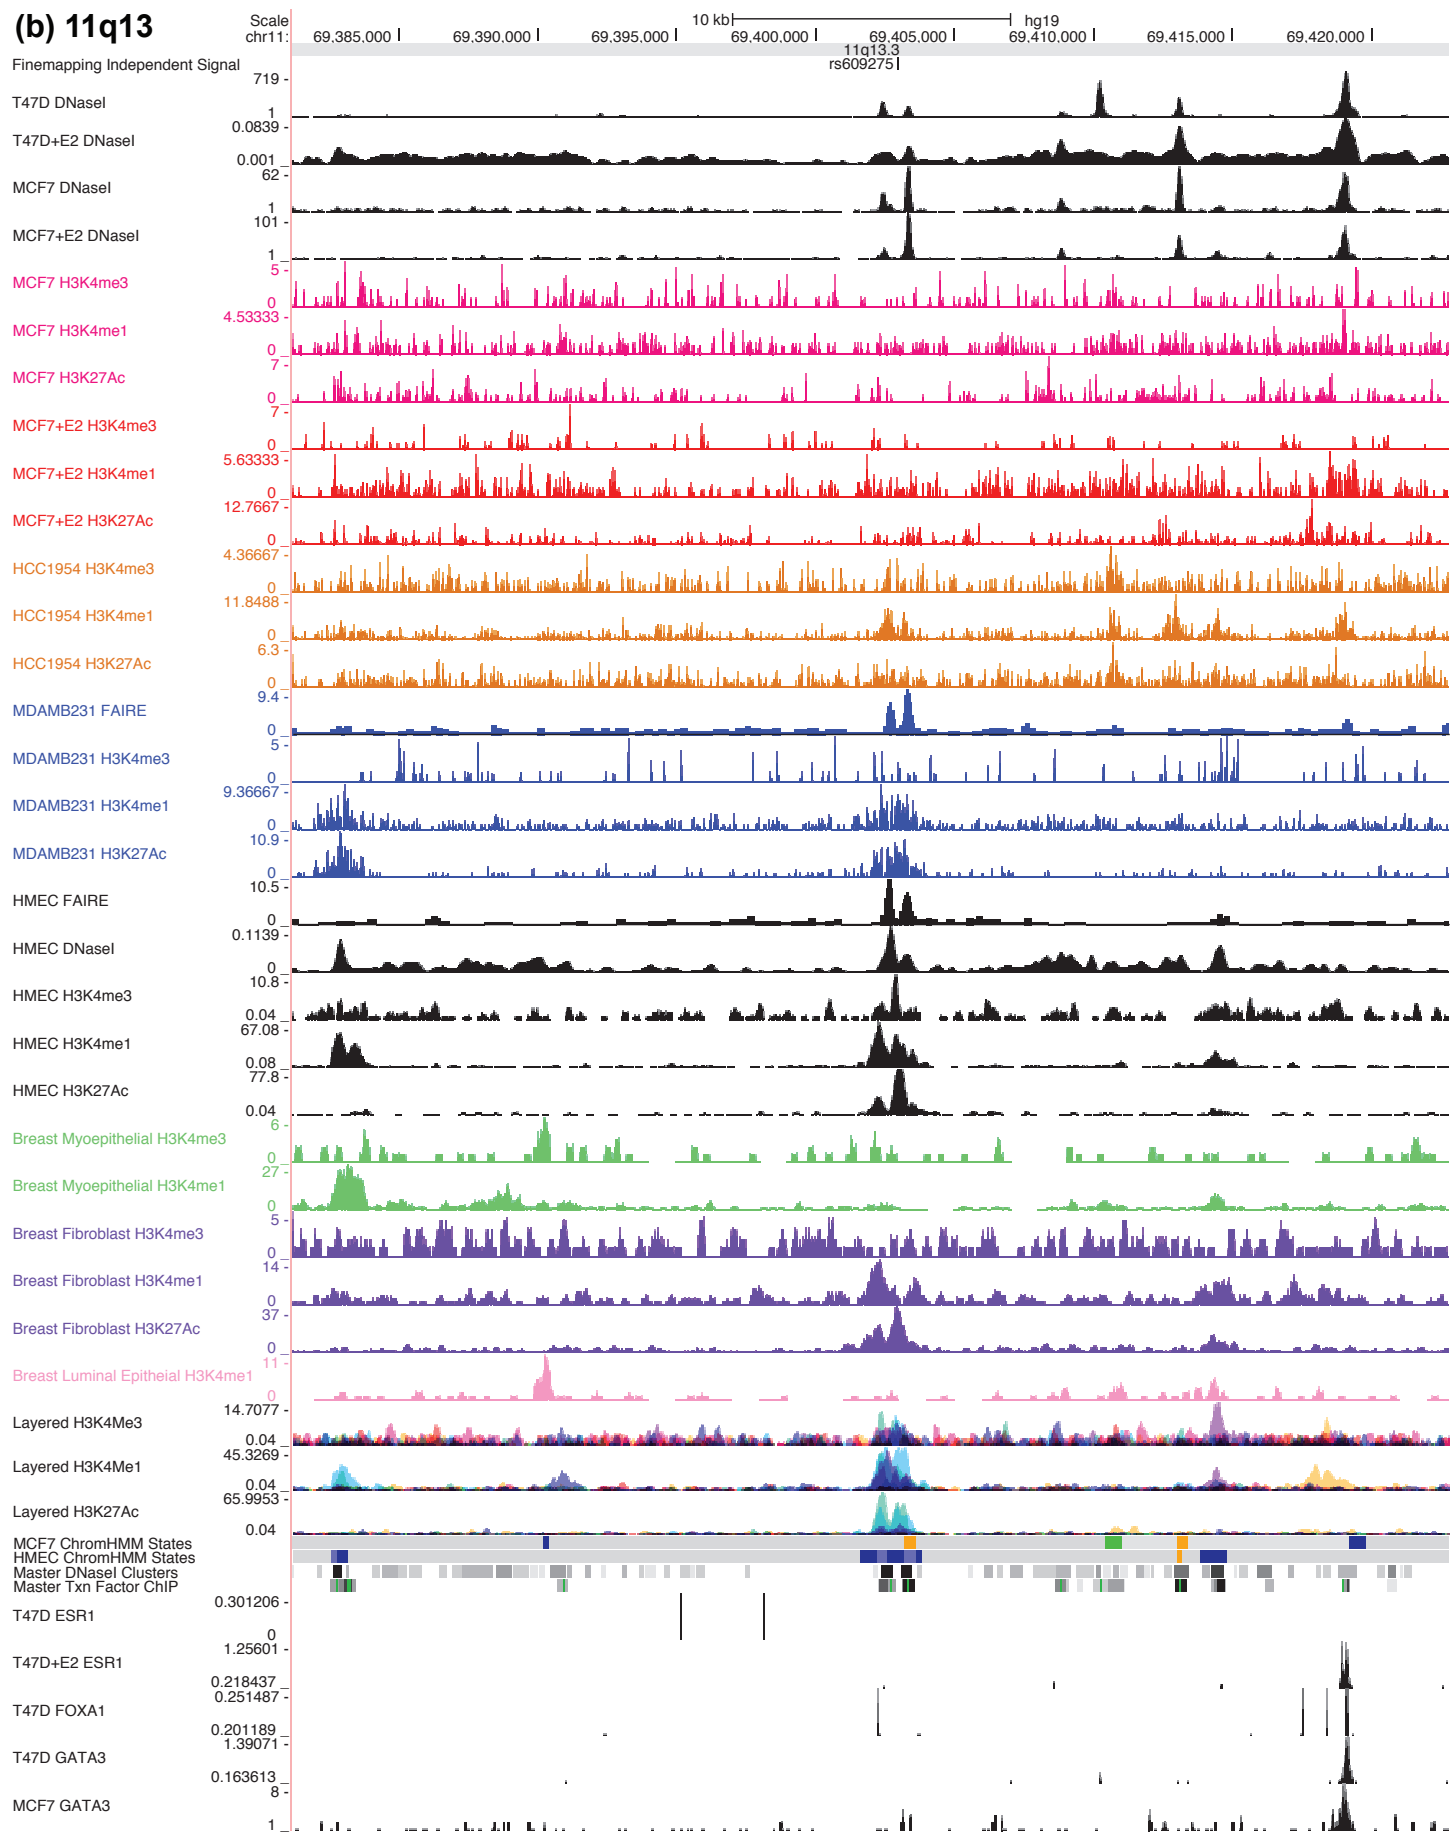

(c) 12p11

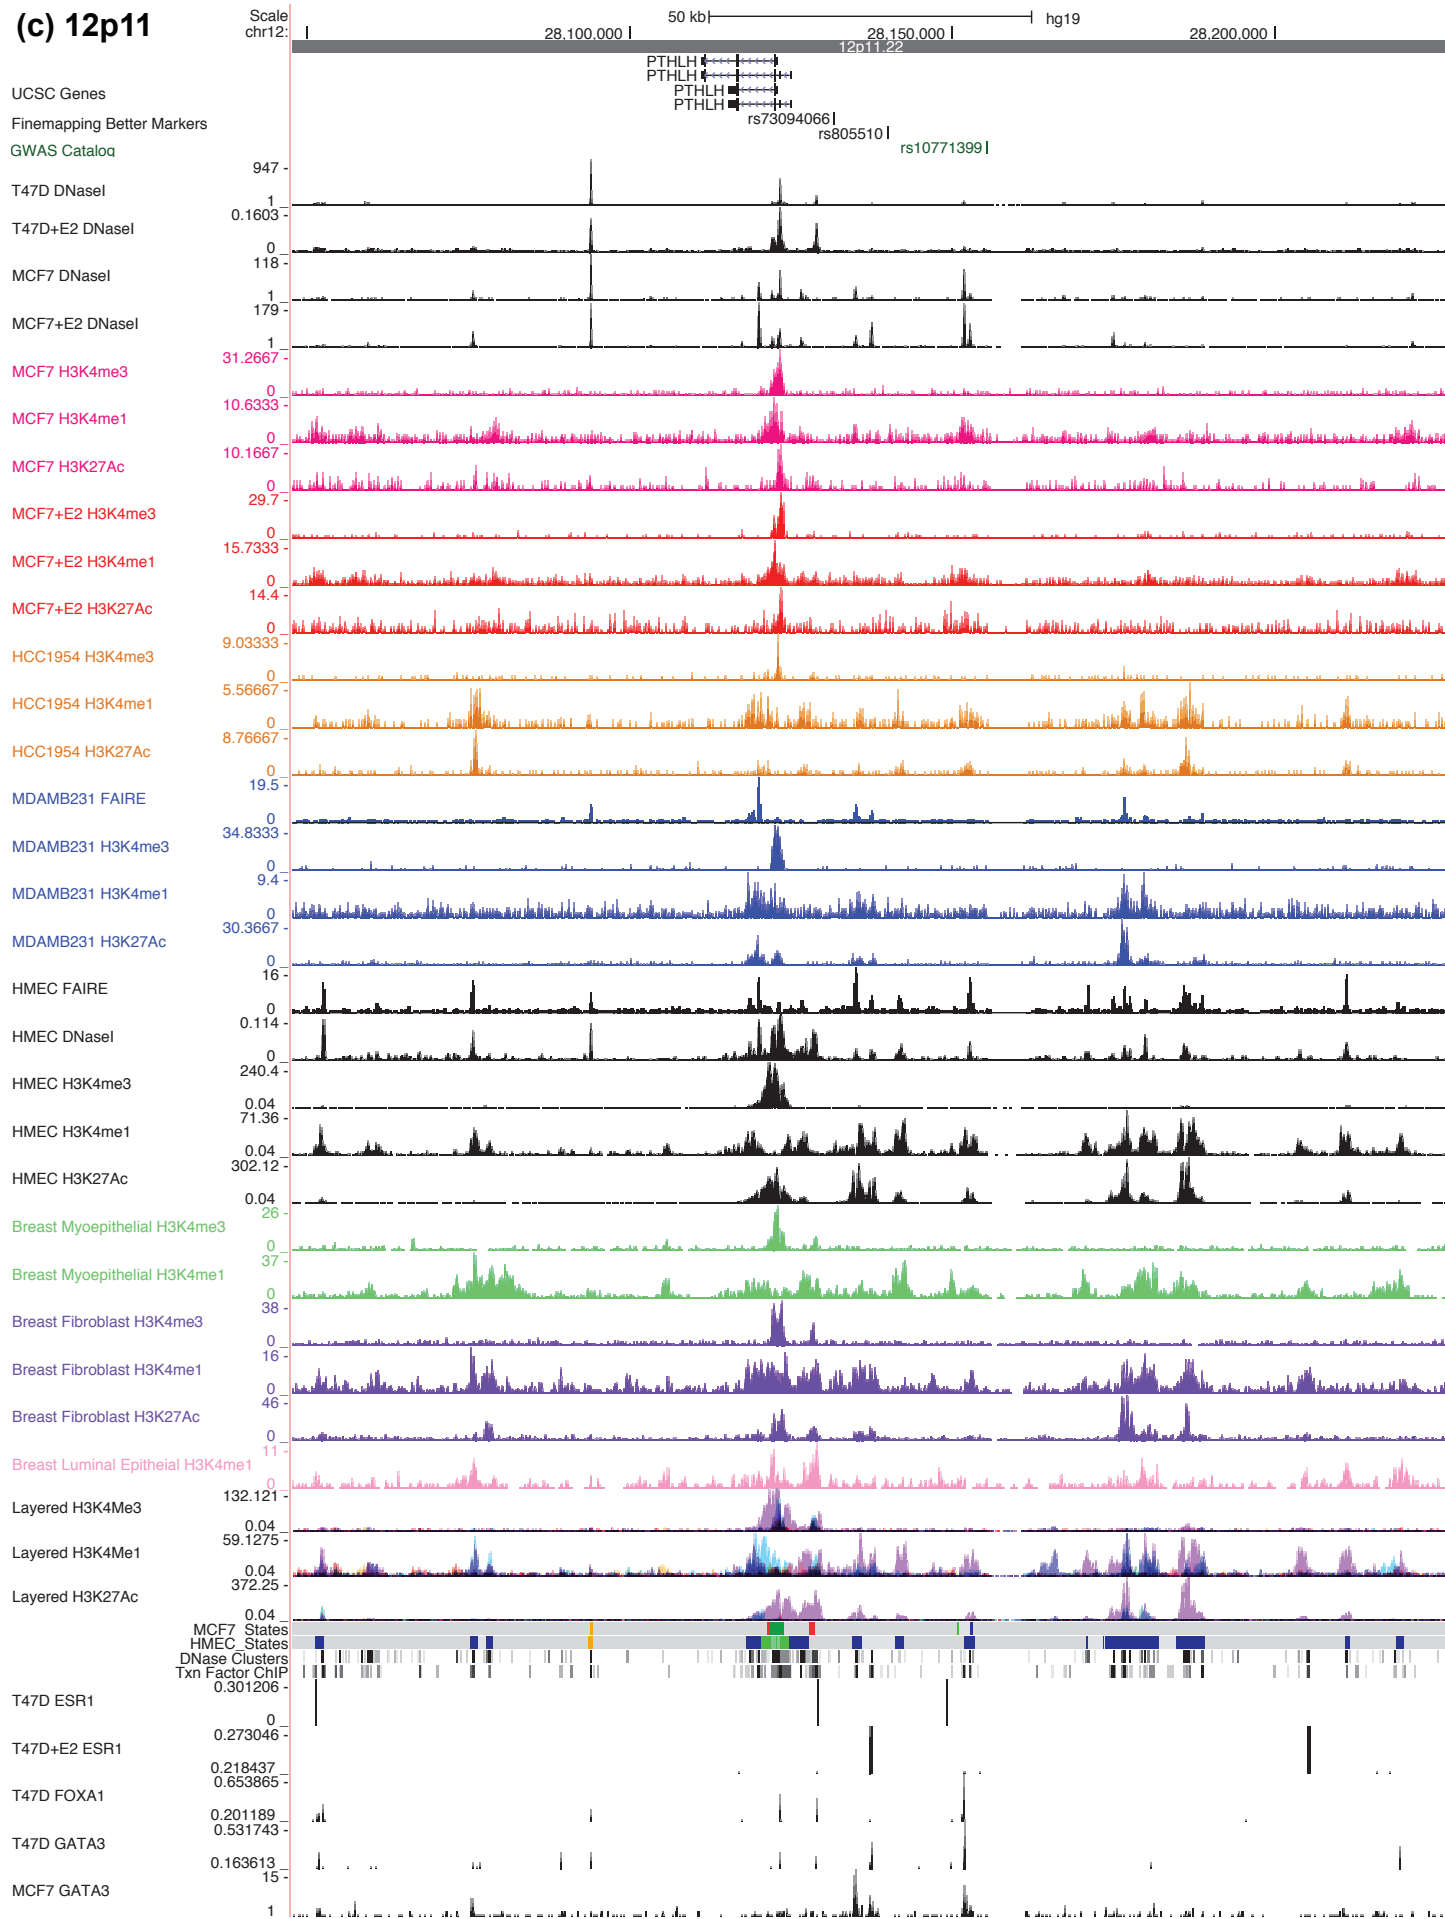

# (d) 14q13

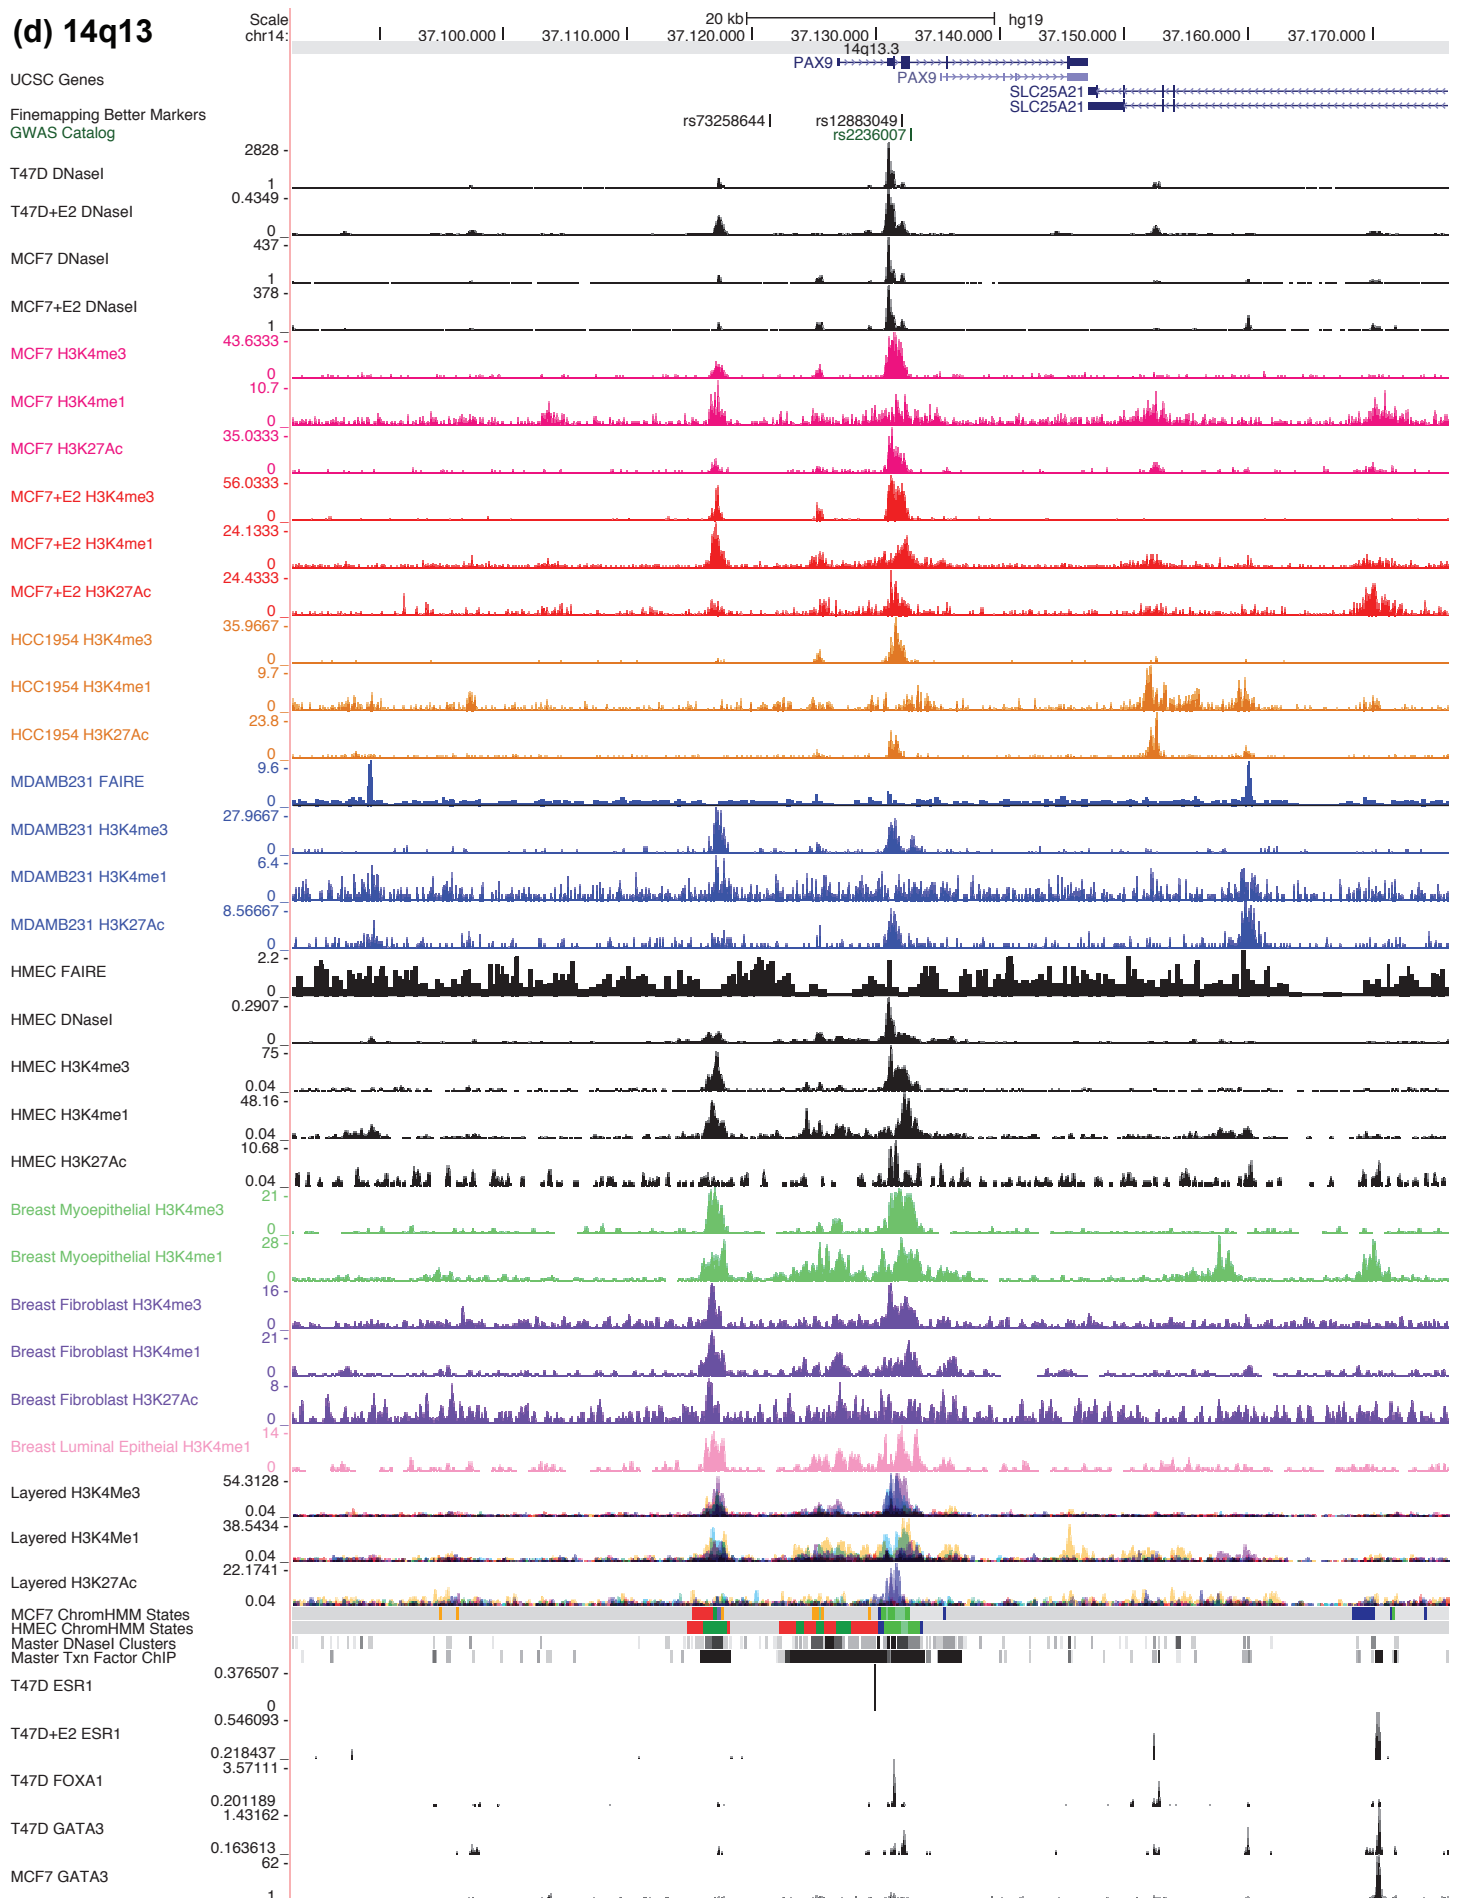



(e) 16q12 (TOX3)

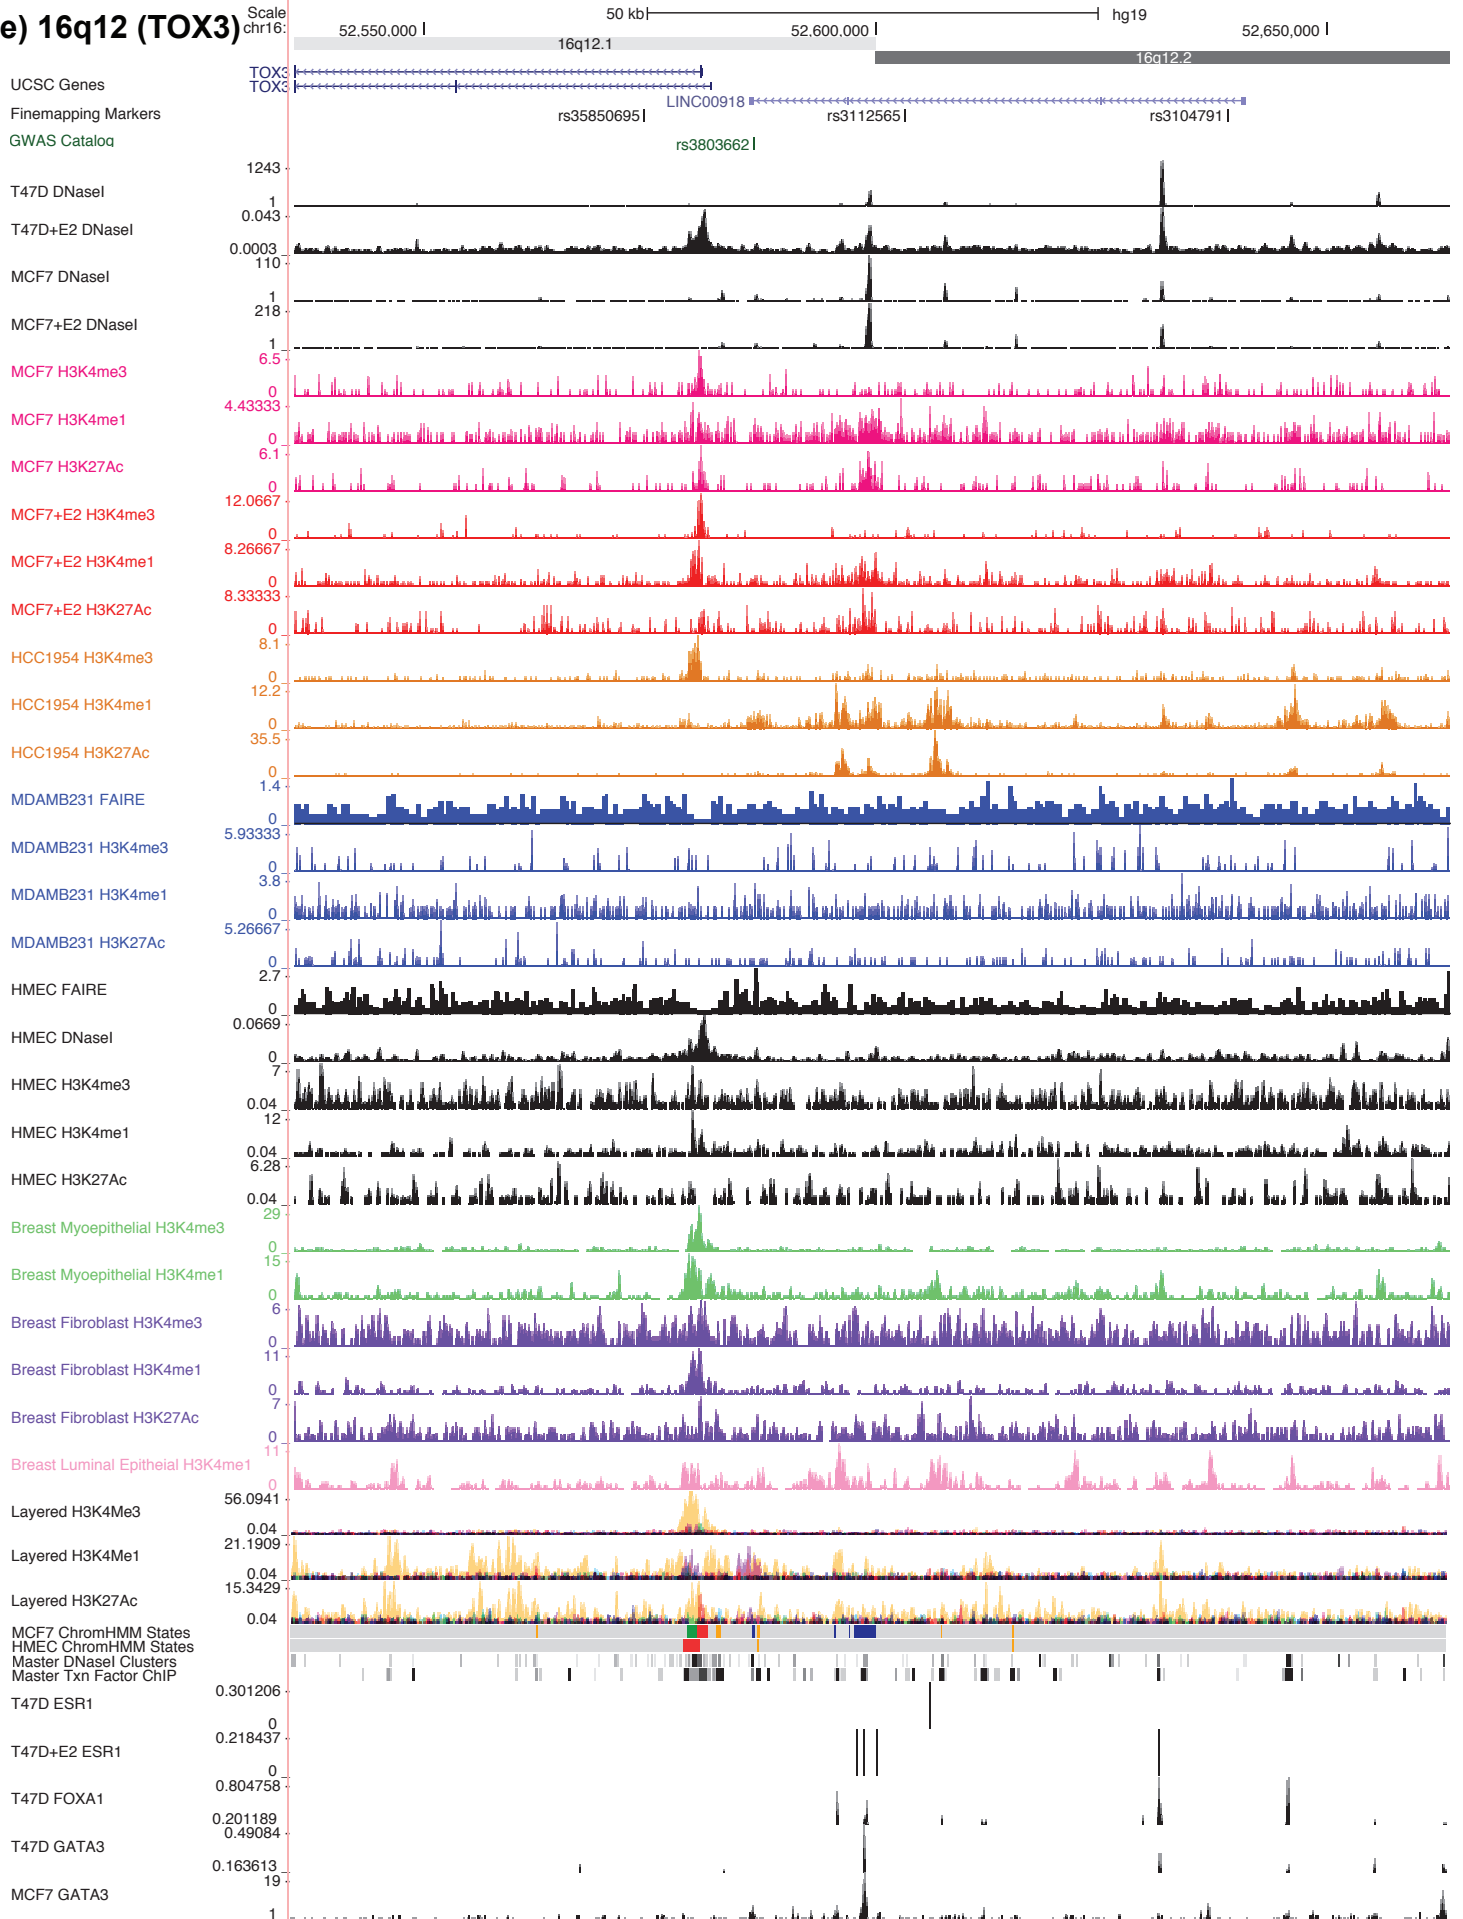

**(f) 16q12 (FTO)**

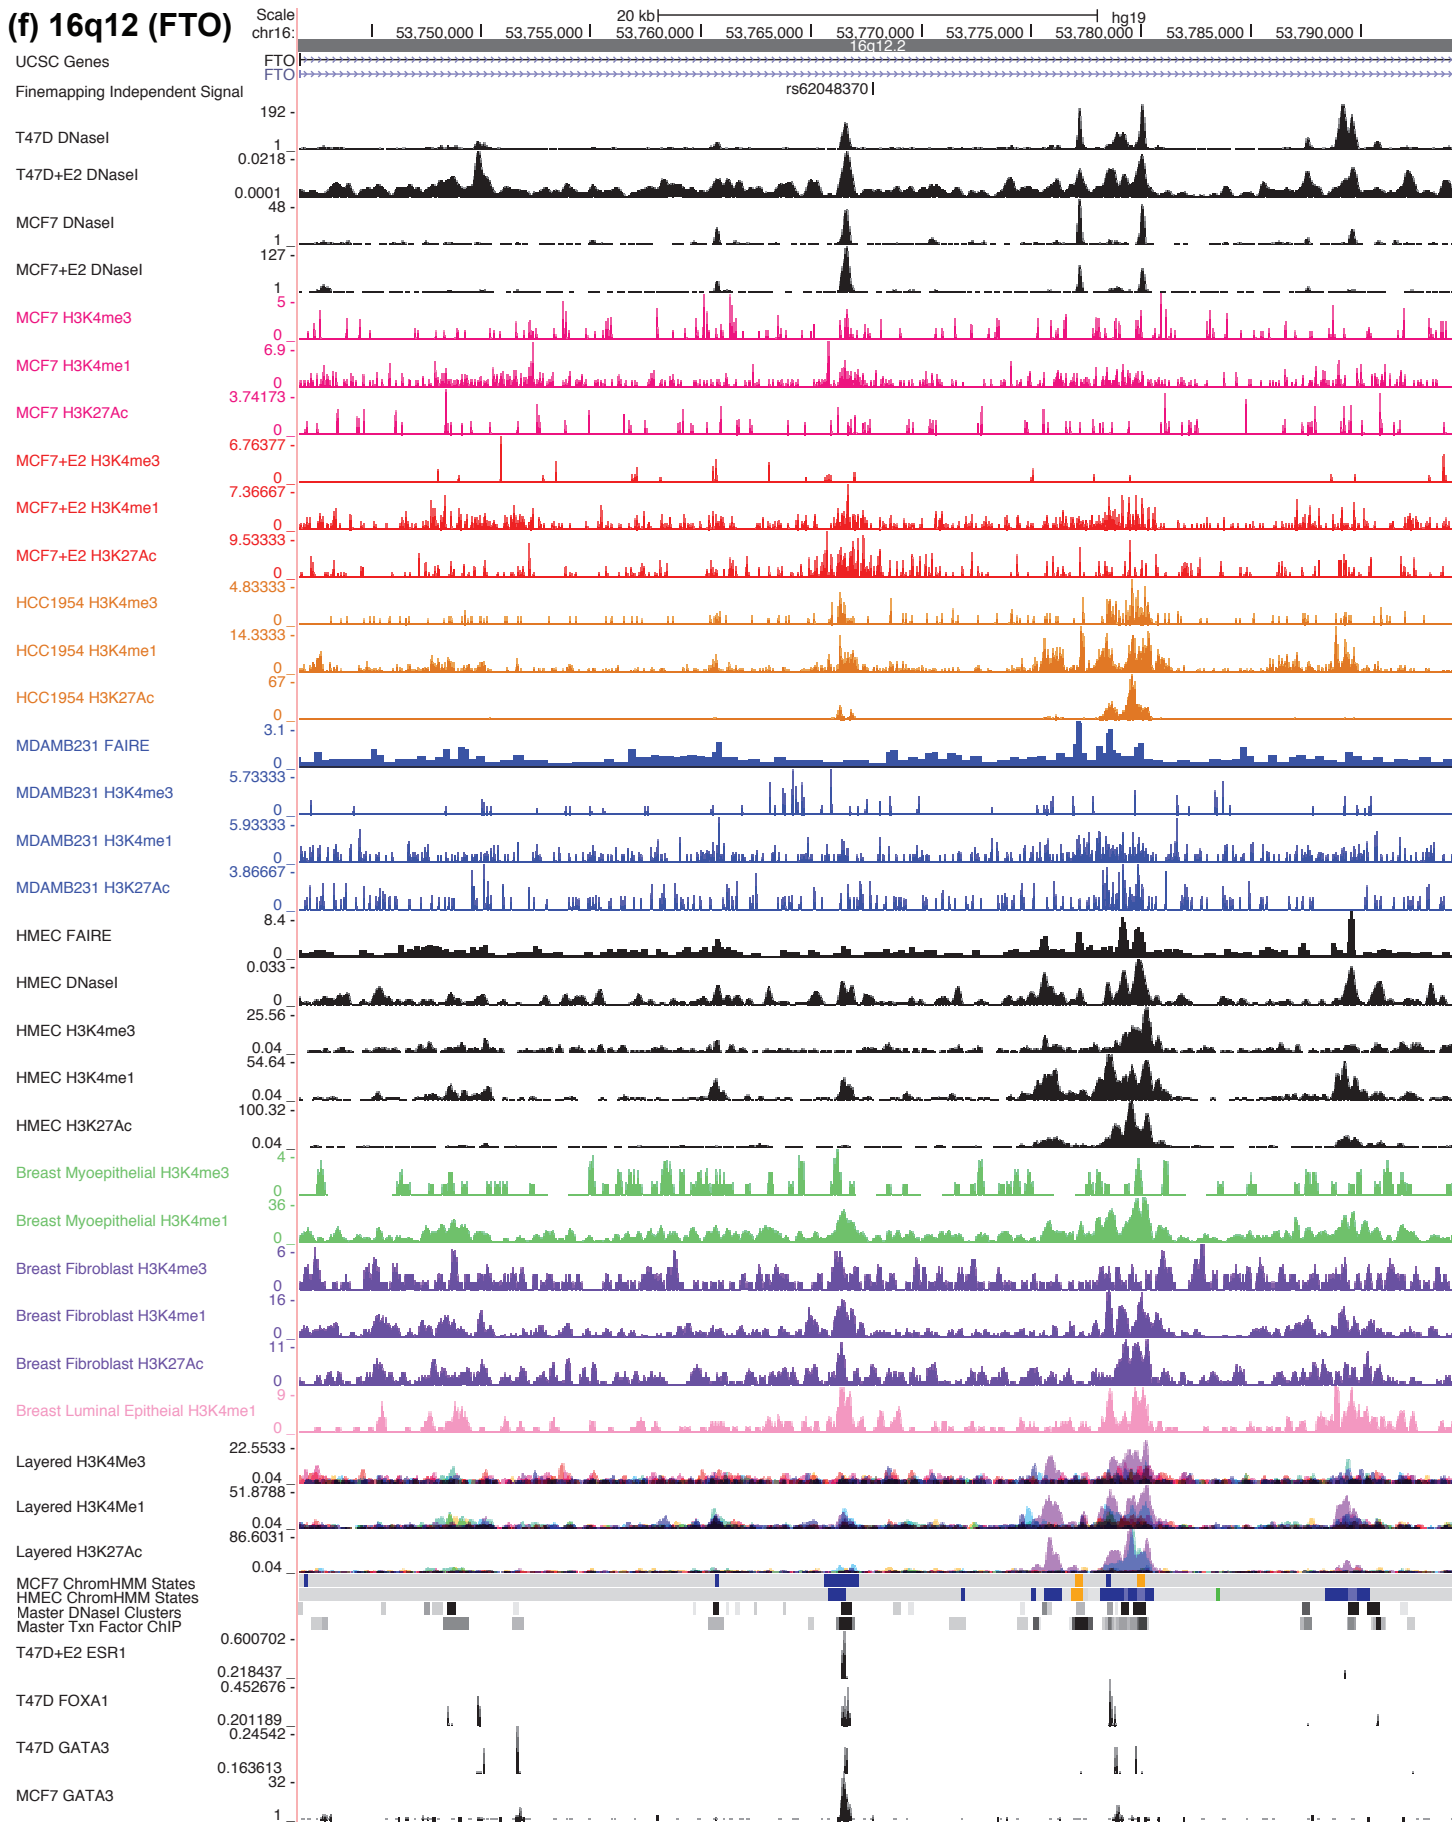

# (g) 16q23

UCSC Genes  
Finemapping Better Marker  
GWAS Catalog

T47D DNaseI

T47D+E2 DNaseI

MCF7 DNaseI

MCF7+E2 DNaseI

MCF7 H3K4me3

MCF7 H3K4me1

MCF7 H3K27Ac

MCF7+E2 H3K4me3

MCF7+E2 H3K4me1

MCF7+E2 H3K27Ac

HCC1954 H3K4me3

HCC1954 H3K4me1

HCC1954 H3K27Ac

MDAMB231 FAIRE

MDAMB231 H3K4me3

MDAMB231 H3K4me1

MDAMB231 H3K27Ac

HMEC FAIRE

HMEC DNaseI

HMEC H3K4me3

HMEC H3K4me1

HMEC H3K27Ac

Breast Myoepithelial H3K4me3

Breast Myoepithelial H3K4me1

Breast Fibroblast H3K4me3

Breast Fibroblast H3K4me1

Breast Fibroblast H3K27Ac

Breast Luminal Epithelial H3K4me1

Layered H3K4me3

Layered H3K4me1

Layered H3K27Ac

MCF7 ChromHMM States

HMEC ChromHMM States

Master DNaseI Clusters

Master Txn Factor ChIP

T47D ESR1

T47D+E2 ESR1

T47D FOXA1

T47D GATA3

MCF7 GATA3

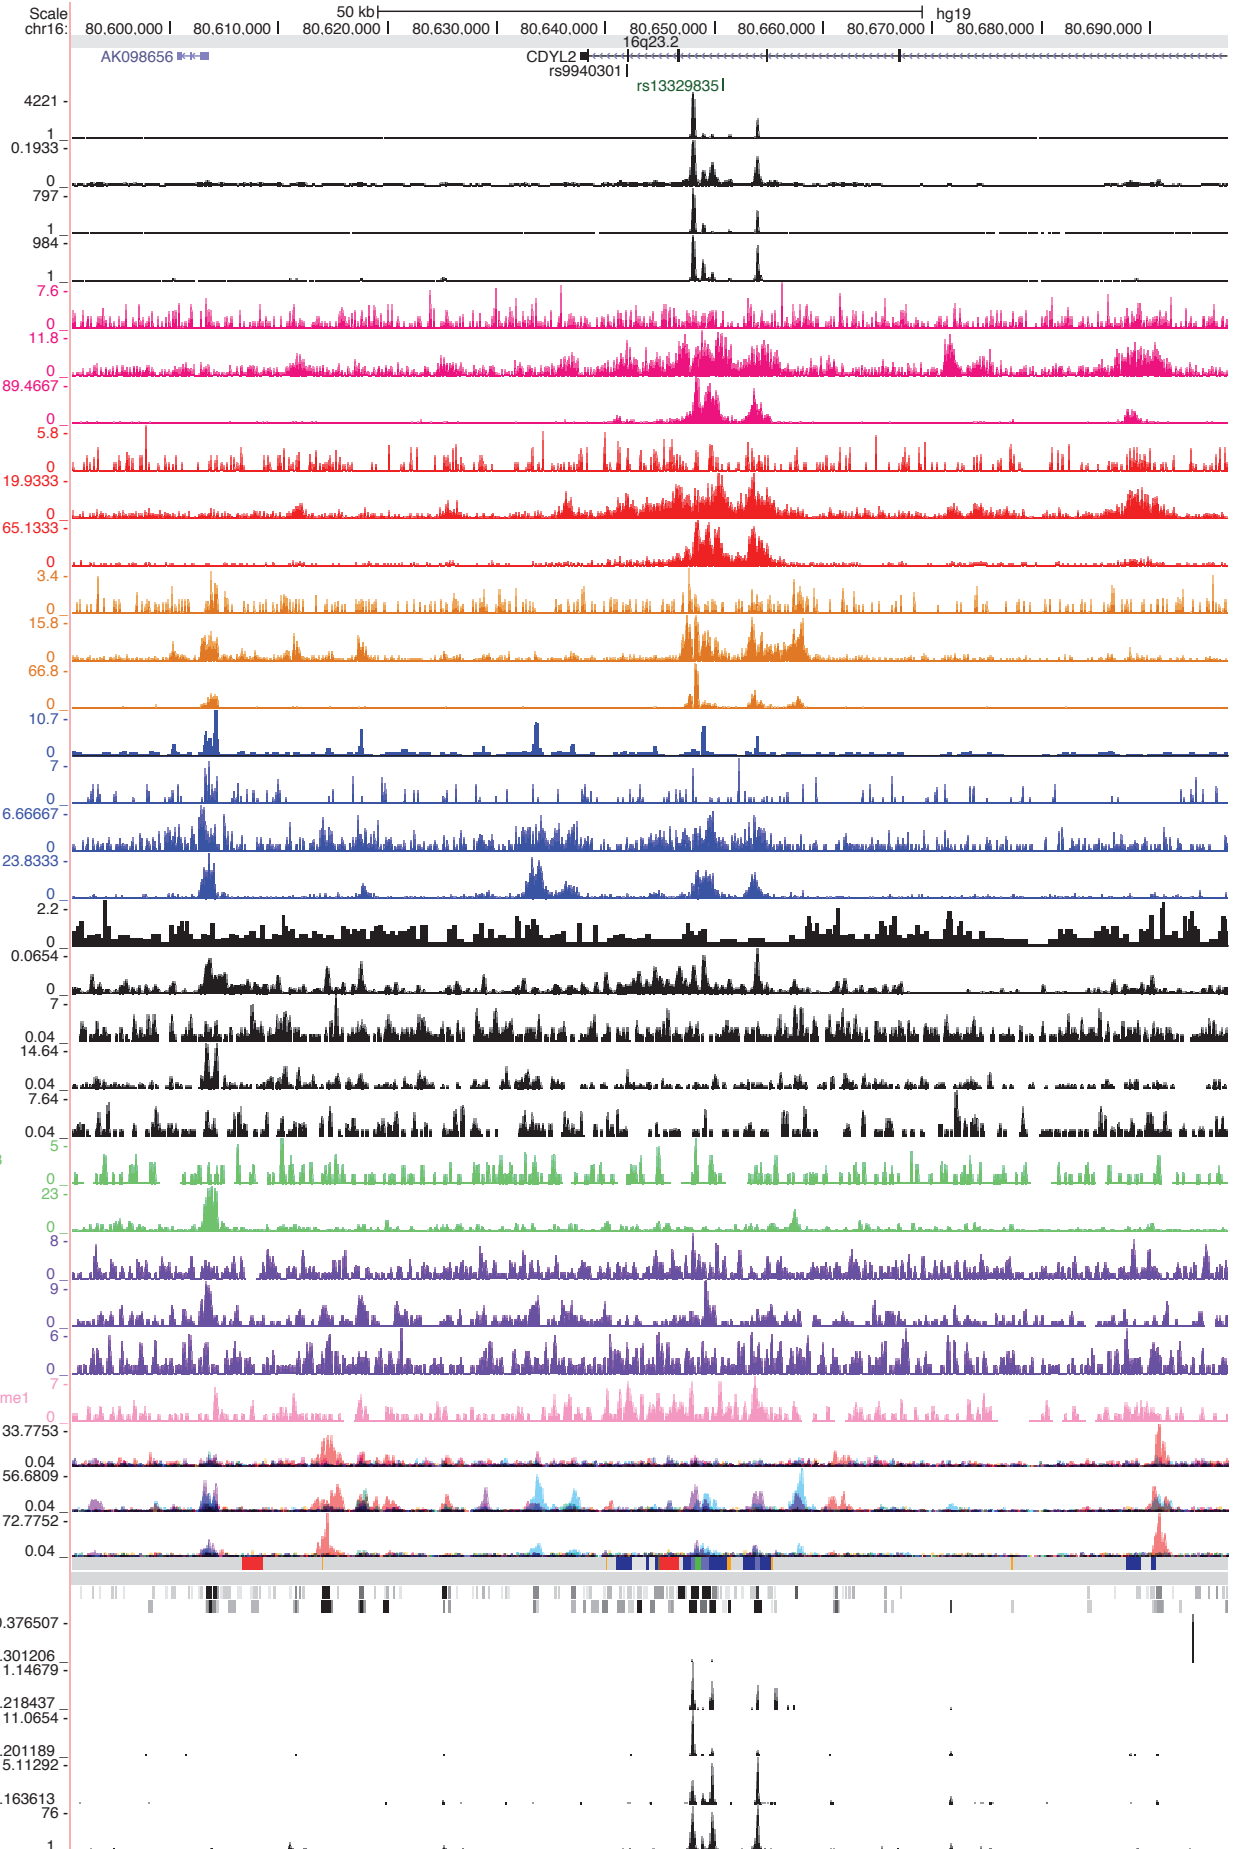

# (h) 19p13

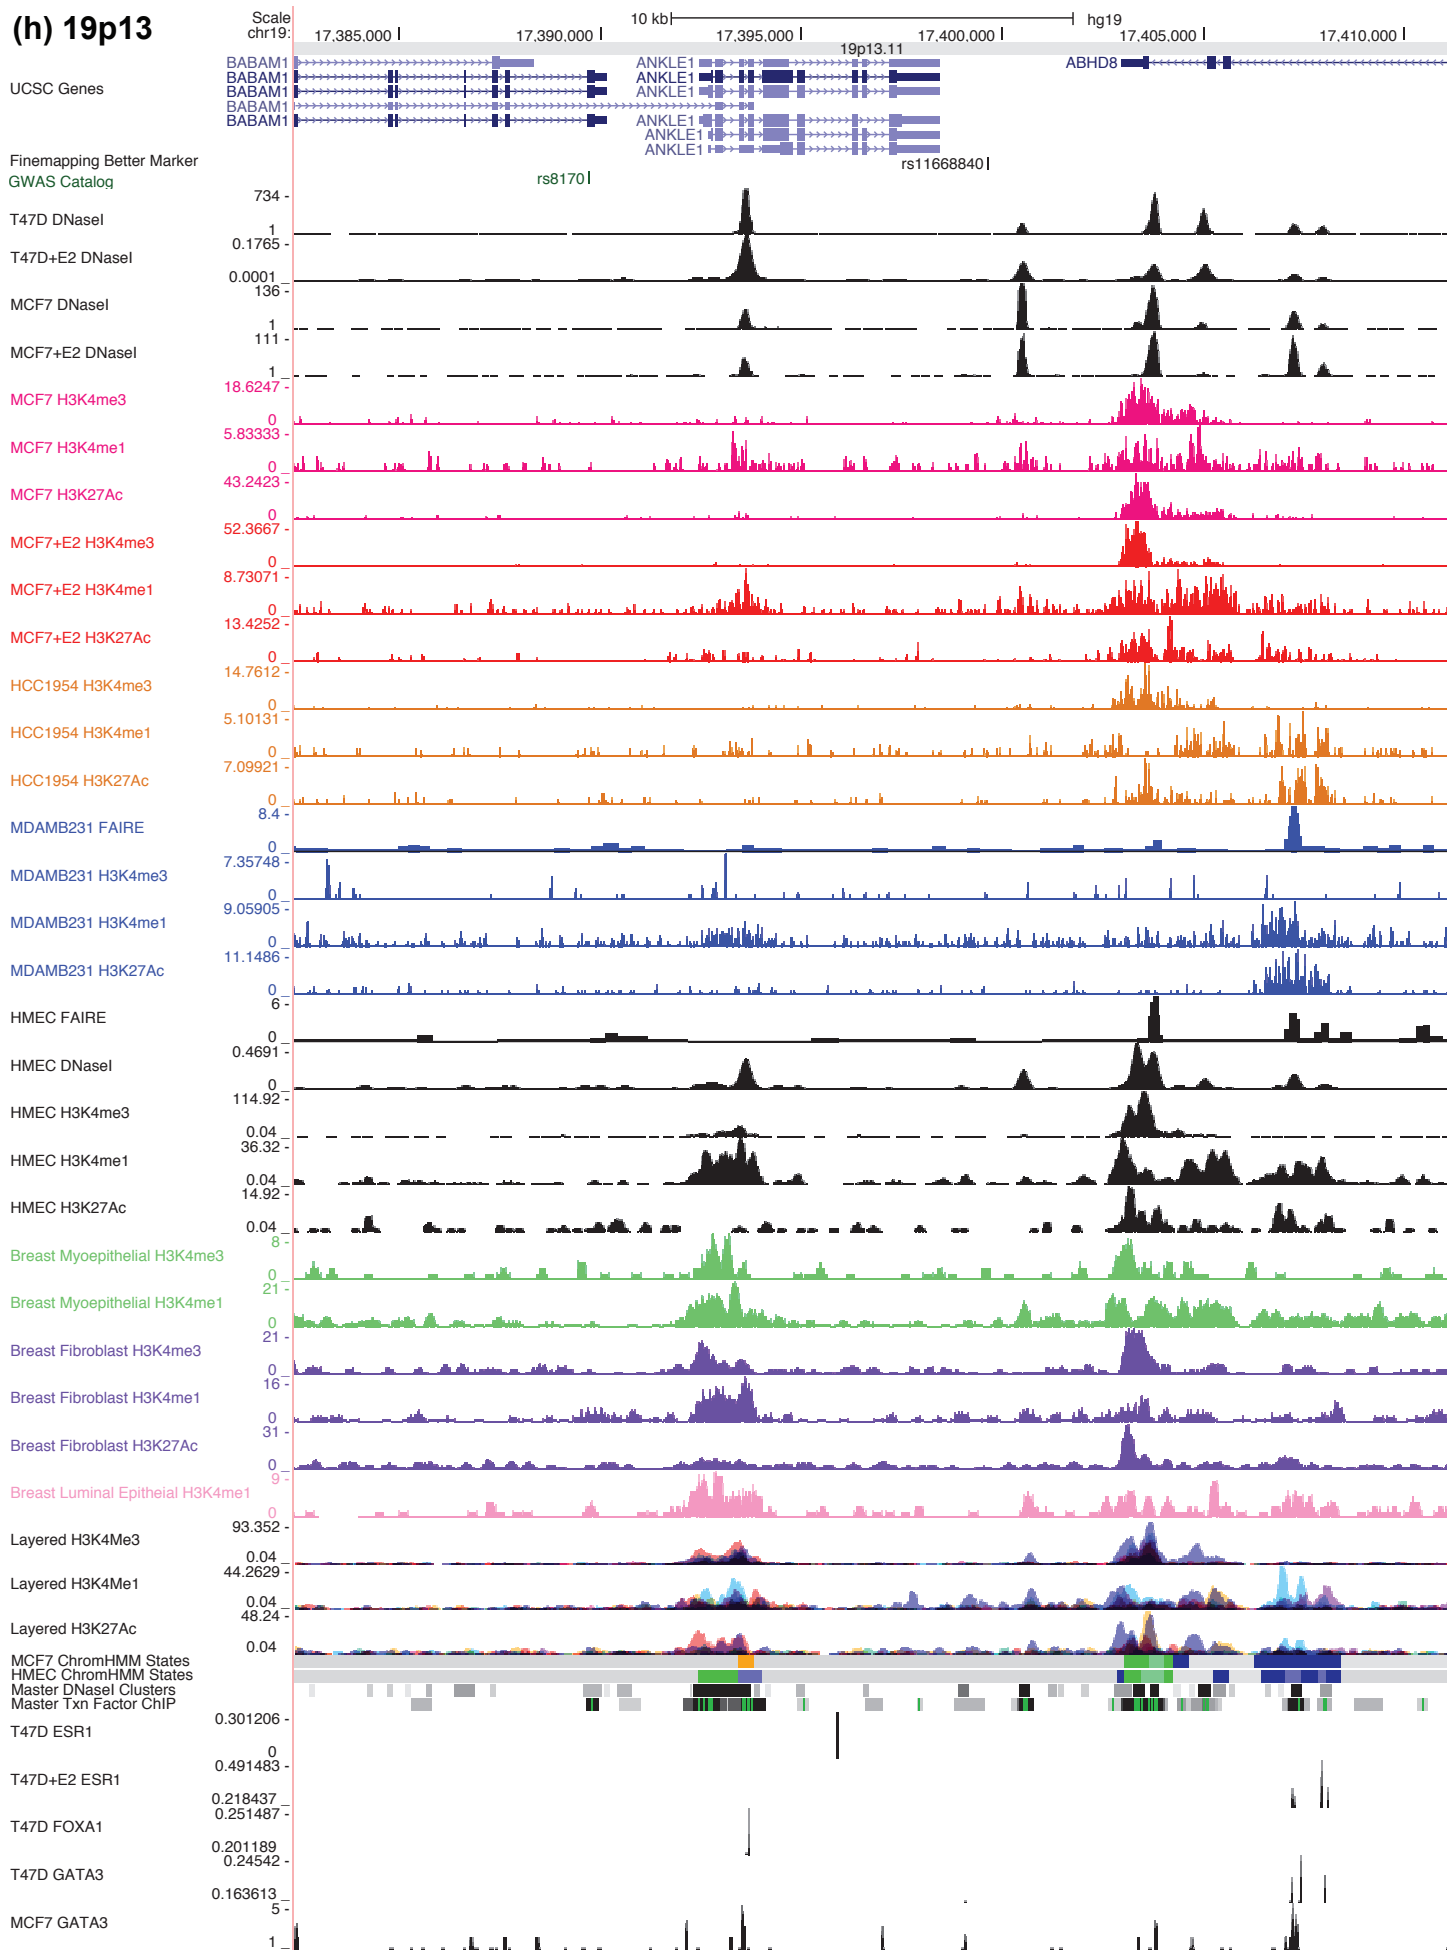

Supplement: NIHMS862401-supplement-9.pdf [file NIHMS862401-supplement-9.pdf]
